# Supplementary material for: Serum metabolome analysis in hyperthyroid cats before and after radioactive iodine therapy
Source: Research Square preprint supplement (doi:10.21203/rs.3.rs-3221800/v1), 2023-08-09
Supplement: Supplementary file 1 [file 520e3508abb72a964bd9d286.xlsx]

## Sheet: Sheet1
Supplementary Table S2. Top 25 metabolic pathways affected in hyperthryoid (n = 7) versus control (n = 12) cats.
Database	Pathway	Total Compounts	Pathway Hits	Raw P value	False Discovery Rate	Impact
KEGG	Tyrosine metabolism	42	4	1.42e-06	5.28e-05	0.16435
	Arginine biosynthesis	14	12	1.7e-06	5.28e-05	0.59898
	Terpenoid backbone biosynthesis	18	1	6.36e-06	0.00013149	0.11429
	Arginine and proline metabolism	38	15	6.34e-05	0.00098266	0.67593
	Purine metabolism	65	15	9.37e-05	0.0010297	0.12542
	Pyrimidine metabolism	39	11	9.96e-05	0.0010297	0.35016
	D-Glutamine and D-glutamate metabolism	6	3	0.00027445	0.0022337	0.5
	Histidine metabolism	16	12	0.00028822	0.0022337	0.81146
	Alanine, aspartate and glutamate metabolism	28	15	0.00057641	0.0039709	0.74119
	Butanoate metabolism	15	6	0.00081343	0.0050433	0
	Citrate cycle (TCA cycle)	20	5	0.0013371	0.0075362	0.25782
	Pantothenate and CoA biosynthesis	19	8	0.001521	0.0078587	0.05714
	Glycerophospholipid metabolism	36	11	0.0025278	0.012056	0.63457
	Glycosylphosphatidylinositol (GPI)-anchor biosynthesis	14	1	0.0035269	0.015619	0.00399
	Steroid biosynthesis	42	4	0.0040648	0.016061	0.0282
	Steroid hormone biosynthesis	85	5	0.0042793	0.016061	0.04289
	Arachidonic acid metabolism	36	2	0.0044037	0.016061	0.3135
	Valine, leucine and isoleucine degradation	40	8	0.0050776	0.01749	0.05516
	Pentose phosphate pathway	22	3	0.0058869	0.01921	0.04712
	Glycine, serine and threonine metabolism	33	14	0.0066081	0.020485	0.72905
	beta-Alanine metabolism	21	8	0.0075083	0.022167	0.5597
	Nitrogen metabolism	6	2	0.0099541	0.028052	0
	Thiamine metabolism	7	1	0.010764	0.028972	0
	Taurine and hypotaurine metabolism	8	6	0.011345	0.028972	0.99999
	Aminoacyl-tRNA biosynthesis	48	19	0.011682	0.028972	0.16667
SMPDB	Arginine and Proline Metabolism	48	14	1.17e-07	1e-05	0.46944
	Thyroid hormone synthesis	5	1	7.35e-06	0.00031586	0
	Phenylalanine and Tyrosine Metabolism	25	5	4.45e-05	0.0012759	0.22124
	Tyrosine Metabolism	55	5	9.18e-05	0.0016829	0
	Steroid Biosynthesis	43	3	0.00010101	0.0016829	0.094332
	Phytanic Acid Peroxisomal Oxidation	19	2	0.00011741	0.0016829	0
	Mitochondrial Electron Transport Chain	15	3	0.000176	0.0019889	0.01867
	Purine Metabolism	63	13	0.00024913	0.0019889	0.11147
	Malate-Aspartate Shuttle	7	2	0.00025303	0.0019889	0.42857
	Pyrimidine Metabolism	54	10	0.0002619	0.0019889	0.15818
	Aspartate Metabolism	34	10	0.00027751	0.0019889	0.94583
	Pentose Phosphate Pathway	27	1	0.00032765	0.0021502	0
	Urea Cycle	23	8	0.00035004	0.0021502	0.53899
	Beta-Alanine Metabolism	26	10	0.00045449	0.0025632	0.44628
	Valine, Leucine and Isoleucine Degradation	51	9	0.00047687	0.0025632	0.027012
	Phospholipid Biosynthesis	25	7	0.00059681	0.0030192	0.39328
	Lysine Degradation	20	3	0.00094942	0.0045361	0.45
	Glutamate Metabolism	45	8	0.0013094	0.0054756	0.074167
	Citric Acid Cycle	26	5	0.0013371	0.0054756	0.2299
	Warburg Effect	49	5	0.0013371	0.0054756	0.10074
	Glycine and Serine Metabolism	50	15	0.0014621	0.0054848	0.1493
	Oxidation of Branched Chain Fatty Acids	22	5	0.0025559	0.0091588	0
	Cardiolipin Biosynthesis	11	2	0.0029136	0.010023	0.2987
	Butyrate Metabolism	16	2	0.0034811	0.011514	0
	Sphingolipid Metabolism	36	11	0.0039594	0.012611	0.4805
KEGG = Kyoto Encyclopedia of Genes and Genomes
SMPDB = Small Molecule Pathway Database
