# Supplementary material for: Serum metabolome analysis in hyperthyroid cats before and after radioactive iodine therapy
Source: Research Square preprint supplement (doi:10.21203/rs.3.rs-3221800/v1), 2023-08-09
Supplement: Supplementary file 2 [file 9d38b7e18b32f631d2cf5192.xlsx]

## Sheet: Data Key & Explanation
	Data Key & Explanation
HeatMap Description	This is the statistical heat map data table associated with the statsitical anlaysis of the data.
	Chemical Annotation Descriptions
PATHWAY SORTORDER	An internally-generated number intended for sorting compounds by biochemical SUPER PATHWAY and SUB PATHWAY
BIOCHEMICAL NAME	The name of the identified biochemical
Biochemical Name	Indicates a compound that has been confirmed based on an authentic chemical standard and we are highly confident in its identity. (Metabolomics Standards Initiative Tier 1 identification)
Biochemical Name*	Indicates a compound that has not been confirmed based on a standard, but we are confident in its identity. (Not Tier 1)
Biochemical Name**	Indicates a compound for which a standard is not available, but we are reasonably confident in its identity or the information provided. (Not Tier 1)
Biochemical Name (#) or [#]	Indicates a compound that is a structural isomer of another compound in the Metabolon spectral library. For example, a steroid that may be sulfated at one of several positions that are indistinguishable by the mass spectrometry data or a diacylglycerol for which more than one stereospecific molecule exists.
SUPER PATHWAY	The general biochemical class assigned to the identified biochemical (e.g. lipid, amino acid, carbohydrate, etc.) intended for sorting compounds by broad biochemical classes
SUB PATHWAY	A more specific biochemical class assigned to the identified biochemical (e.g. TCA cycle, monoacylglycerols, etc.) intended for grouping/sorting compounds by biochemical pathway/class
PLATFORM	The Metabolon untargeted metabolomics platform consists of four different methods (i.e. Pos Late, Pos Early, Polar, and Neg). This column indicates which method was used to report the values associated with the detected biochemical.
COMP ID	An internally-generated Metabolon compound identifier
KEGG	An alphanumeric compound identifier and link to compound information in the Kyoto Encyclopedia of Genes and Genomes (KEGG)
HMDB	An alphanumeric compound identifier and link to compound information maintained by the Human Metabolome Database (HMDB)
PUBCHEM	A unique numerical identifier assigned by the National Center for Biotechnology Information (NCBI) and searchable in the PubChem database
CHEM ID	Unique identifier for each biochemical. CHEM IDs are listed in the top row of the data tabs of the accompanying client data table (CDT) file.
CAS	A unique numerical identifier assigned by the Chemical Abstracts Service (CAS) to every chemical substance described in the open scientific literature
	Statistical Analysis/Descriptors
FOLD CHANGE	Indicates the ratio of the mean scaled intesity for a metabolite between two experimental groups.
0.55	Green: indicates significant difference (p≤0.05) between the groups shown, metabolite ratio of < 1.00
0.76	Light Green: narrowly missed statistical cutoff for significance 0.05<p<0.10, metabolite ratio of < 1.00
1.71	Red: indicates significant difference (p≤0.05) between the groups shown; metabolite ratio of ≥ 1.00
1.32	Light Red: narrowly missed statistical cutoff for significance 0.05<p<0.10, metabolite ratio of ≥ 1.00
1.2	Non-colored text and cell: mean values are not significantly different for that comparison
	Blue: indicates significant (p≤0.05) ANOVA effect.
	Light Blue: indicates 0.05<p<0.10 ANOVA effect
P-VALUE	p-values for each comparison is derived from the Natural Log-Transformed Data using the corresponding statistical analysis (for eg. t-Test, ANOVA, etc.)
Q-VALUE	Q-values for each comparison is derived from the Natural Log-Transformed Data using False Discovery Rate (FDR) method.
Mean Values	Represents the mean scaled intensity for a metabolite in a particular experimental group.
% FILL	Represents the total percent of samples in a experimental group a metabolite was detected.
© Metabolon, Inc. All rights reserved. The Metabolon name, logo and related trademarks and service marks, owned by Metabolon, Inc. are registered and/or used in the United States and many foreign countries. Any use, copying or reproduction of the trademarks, logos, information, images or designs contained in this document is strictly prohibited without the prior written permission of Metabolon, I…

## Sheet: Pathway Heatmap
Supplementary Table S1. Results of significant metabolites in hyperthryoid (n = 7) versus control (n = 12) cats.
Heat map of statistically significant biochemicals profiled in this study. Red and green shaded cells indicate p≤0.05 (red indicates that the mean values are significantly higher for that comparison; green values significantly lower). Light red and light green shaded cells indicate 0.05<p<0.10 (light red indicates that the mean values trend higher for that comparison; light green values trend low…										Fold of Change							Statistical Values
										Welch's Two-Sample t-Test			Matched Pairs t-Test				Welch's Two-Sample t-Test						Matched Pairs t-Test							Mean Values					% Filled Values
										HYP 0	HYP 1	HYP 3	HYP 1	HYP 3	HYP 3		HYP 0		HYP 1		HYP 3		HYP 1		HYP 3		HYP 3			F CON	HYP 0	HYP 1	HYP 3		F CON	HYP 0	HYP 1	HYP 3		Super Pathway	Sub Pathway	Chemical ID	CAS
																X	F CON		F CON		F CON		HYP 0		HYP 0		HYP 1		X
Pathway Sort Order	Super Pathway	Sub Pathway	Biochemical Name	Platform	Comp ID	KEGG	HMDB	PUBCHEM	X	F CON	F CON	F CON	HYP 0	HYP 0	HYP 1	X	p-value	q-value	p-value	q-value	p-value	q-value	p-value	q-value	p-value	q-value	p-value	q-value	X					X					X
1	Amino Acid	Glycine, Serine and Threonine Metabolism	glycine	LC/MS pos early	58	C00037	HMDB0000123	750		0.75	0.88	1	1.17	1.33	1.14		0.0505949	0.0957925	0.418226	0.681928	0.860031	0.868761	0.019204	0.0540092	0.0753396	0.119815	0.217352	0.743264		1.1368	0.8549	0.9986	1.1402		100	100	100	100		Amino Acid	Glycine, Serine and Threonine Metabolism	340	56-40-6
2			N-acetylglycine	LC/MS polar	27710		HMDB0000532	10972		1.03	1.21	0.87	1.18	0.84	0.71		0.948568	0.530639	0.741931	0.773858	0.753461	0.854631	0.529196	0.334047	0.55597	0.384908	0.316636	0.81569		1.2895	1.3262	1.5634	1.1165		100	100	100	100		Amino Acid	Glycine, Serine and Threonine Metabolism	100001006	543-24-8
5			sarcosine	LC/MS pos early	1516	C00213	HMDB0000271	1088		0.8	0.75	1.12	0.94	1.41	1.49		0.363424	0.327601	0.205954	0.579607	0.71302	0.849177	0.610208	0.364496	0.208754	0.219935	0.147896	0.734339		1.1969	0.9572	0.9018	1.3459		100	100	100	100		Amino Acid	Glycine, Serine and Threonine Metabolism	1023	107-97-1
6			dimethylglycine	LC/MS pos early	5086	C03626	HMDB0000092	673		0.77	0.75	0.91	0.97	1.17	1.21		0.132411	0.175292	0.0728178	0.551308	0.669583	0.832616	0.872283	0.446162	0.0688645	0.114976	0.013432	0.672423		1.1738	0.9073	0.8833	1.0648		100	100	100	100		Amino Acid	Glycine, Serine and Threonine Metabolism	806	1118-68-9
7			betaine	LC/MS pos early	3141	C00719	HMDB0000043	247		0.55	1.08	0.99	1.96	1.81	0.92		0.00774554	0.0353392	0.444936	0.69519	0.77102	0.854631	0.000250741	0.0181999	0.0030252	0.0408052	0.399128	0.825559		1.2218	0.6725	1.3158	1.2143		100	100	100	100		Amino Acid	Glycine, Serine and Threonine Metabolism	799	107-43-7
10			serine	LC/MS pos early	1648	C00065	HMDB0000187	5951		0.85	0.81	0.91	0.95	1.07	1.13		0.342733	0.321333	0.161629	0.579607	0.65877	0.829943	0.479281	0.313555	0.655753	0.417147	0.340447	0.81569		1.2433	1.0626	1.0045	1.1374		100	100	100	100		Amino Acid	Glycine, Serine and Threonine Metabolism	503	56-45-1
11			N-acetylserine	LC/MS polar	37076		HMDB0002931	65249		0.81	0.87	0.99	1.08	1.23	1.14		0.110534	0.152848	0.375782	0.669085	0.873629	0.870829	0.695237	0.393165	0.0057283	0.0449856	0.151567	0.734339		1.1269	0.9076	0.9763	1.1142		100	100	100	100		Amino Acid	Glycine, Serine and Threonine Metabolism	100001851	97-14-3
17			threonine	LC/MS pos early	1284	C00188	HMDB0000167	6288		0.87	0.81	1.06	0.94	1.23	1.31		0.397149	0.347333	0.205114	0.579607	0.817076	0.868171	0.234953	0.204376	0.312087	0.282326	0.0584323	0.703731		1.1575	1.0035	0.9406	1.23		100	100	100	100		Amino Acid	Glycine, Serine and Threonine Metabolism	564	72-19-5
18			N-acetylthreonine	LC/MS neg	33939		HMDB0062557	152204		0.7	0.74	0.79	1.04	1.12	1.08		0.138755	0.180531	0.231719	0.579607	0.414414	0.744374	0.969424	0.475155	0.283387	0.270751	0.129872	0.729821		1.3084	0.9214	0.9619	1.0345		100	100	100	100		Amino Acid	Glycine, Serine and Threonine Metabolism	100001274	17093-74-2
19			allo-threonine	LC/MS polar	15142	C05519	HMDB0004041	99289		0.67	1	1.08	1.5	1.61	1.08		0.0130623	0.0479167	0.992757	0.809126	0.746442	0.854631	0.0309275	0.0666151	0.0357546	0.0820473	0.798415	0.935671		0.9125	0.609	0.9128	0.9825		83	43	86	86		Amino Acid	Glycine, Serine and Threonine Metabolism	100000272	28954-12-3
29		Alanine and Aspartate Metabolism	alanine	LC/MS pos early	1126	C00041	HMDB0000161	5950		1.08	0.8	0.87	0.74	0.81	1.09		0.284694	0.283213	0.0833994	0.551308	0.2318	0.682672	0.000558639	0.0217456	0.00570883	0.0449856	0.241701	0.770853		1.1148	1.2041	0.8924	0.9733		100	100	100	100		Amino Acid	Alanine and Aspartate Metabolism	811	56-41-7
31			N-acetylalanine	LC/MS polar	1585	C02847	HMDB0000766	88064		0.87	0.87	0.98	0.99	1.13	1.13		0.202799	0.231374	0.215924	0.579607	0.975142	0.882192	0.727867	0.404276	0.170588	0.193518	0.018592	0.672423		1.137	0.992	0.9837	1.1161		100	100	100	100		Amino Acid	Alanine and Aspartate Metabolism	1110	97-69-8
32			N-methylalanine	LC/MS pos early	37069	C02721	HMDB0094692	4377		3.94	1.34	1.5	0.34	0.38	1.12		0.626458	0.441225	0.800941	0.780265	0.695329	0.843715	0.355918	0.262644	0.522433	0.372936	0.214104	0.743264		0.1637	0.6442	0.2196	0.2455		25	14	14	29		Amino Acid	Alanine and Aspartate Metabolism	100001823	600-21-5
33			N,N-dimethylalanine	LC/MS pos early	63151			5488191		0.94	3.39	3.79	3.6	4.02	1.12		0.784104	0.48106	0.0760032	0.551308	0.176439	0.648226	0.00744058	0.0378015	0.0496252	0.0972406	0.866508	0.942048		0.9888	0.9316	3.3545	3.7428		100	100	100	100		Amino Acid	Alanine and Aspartate Metabolism	100020371	2812-31-9
35			N-carbamoylalanine	LC/MS pos early	52340			426409		2.29	1.54	1.7	0.68	0.74	1.1		0.108861	0.152128	0.595767	0.738422	0.00977791	0.491602	0.42715	0.28959	0.863731	0.484353	0.286696	0.795136		0.9169	2.098	1.4162	1.559		92	100	71	100		Amino Acid	Alanine and Aspartate Metabolism	100006369	77340-50-2
36			aspartate	LC/MS pos early	443	C00049	HMDB0000191	5960		1.34	0.9	1.46	0.67	1.09	1.63		0.155505	0.196046	0.487184	0.716481	0.128412	0.638125	0.0406612	0.0744839	0.763802	0.456682	0.0206692	0.672423		0.9002	1.2058	0.8059	1.315		100	100	100	100		Amino Acid	Alanine and Aspartate Metabolism	234	56-84-8
37			N-acetylaspartate (NAA)	LC/MS pos early	22185	C01042	HMDB0000812	65065		1.23	1.33	1.47	1.08	1.2	1.11		0.368903	0.329726	0.29373	0.618352	0.167443	0.648226	0.503561	0.323994	0.214173	0.223825	0.426787	0.845053		0.9343	1.1464	1.239	1.3732		100	100	100	100		Amino Acid	Alanine and Aspartate Metabolism	100000787	997-55-7;997-55-7
40			asparagine	LC/MS pos early	512	C00152	HMDB0000168	6267		0.73	0.58	0.77	0.78	1.05	1.34		0.0315787	0.075823	0.000257028	0.107885	0.13011	0.638125	0.0249606	0.0601398	0.957971	0.507757	0.0716848	0.703731		1.3259	0.9733	0.7631	1.0256		100	100	100	100		Amino Acid	Alanine and Aspartate Metabolism	917	70-47-3
42			N-acetylasparagine	LC/MS pos early	33942		HMDB0006028	99715		0.67	0.83	1.07	1.23	1.6	1.3		0.0817928	0.128208	0.568475	0.730008	0.487446	0.755964	0.0713869	0.104312	0.0379578	0.0844052	0.0450635	0.672423		1.2151	0.8137	1.0025	1.3005		100	100	100	100		Amino Acid	Alanine and Aspartate Metabolism	100001257	4033-40-3
43			hydroxyasparagine**	LC/MS pos early	62060	C20631	HMDB32332	15991574		0.74	0.82	0.72	1.11	0.97	0.87		0.11021	0.152848	0.38642	0.67121	0.122208	0.638125	0.485041	0.316437	0.597138	0.399587	0.0727021	0.703731		1.2741	0.9425	1.0488	0.9152		100	100	100	100		Amino Acid	Alanine and Aspartate Metabolism	100020205
46		Glutamate Metabolism	glutamate	LC/MS pos early	57	C00025 C00217	HMDB0000148	33032		1.31	1	1.37	0.77	1.05	1.37		0.00125387	0.0112261	0.905475	0.789259	0.0730454	0.577955	0.0289664	0.0638839	0.980738	0.513714	0.0221072	0.672423		0.9024	1.1799	0.9029	1.2396		100	100	100	100		Amino Acid	Glutamate Metabolism	561	56-86-0
47			glutamine	LC/MS pos early	53	C00064	HMDB0000641	5961		0.88	0.82	0.94	0.93	1.06	1.15		0.268188	0.272436	0.0989663	0.551308	0.632398	0.815377	0.20034	0.187163	0.478932	0.35395	0.0192035	0.672423		1.1014	0.971	0.8985	1.0336		100	100	100	100		Amino Acid	Glutamate Metabolism	563	56-85-9
48			alpha-ketoglutaramate*	LC/MS polar	62101	C00940	HMDB0001552	48		1.2	1.12	1.25	0.93	1.04	1.11		0.0607398	0.106464	0.471152	0.712619	0.237278	0.682672	0.47203	0.311227	0.859447	0.483665	0.443241	0.852161		0.9482	1.14	1.0626	1.1837		100	100	100	100		Amino Acid	Glutamate Metabolism	100002397	18465-19-5
49			N-acetylglutamate	LC/MS pos early	15720	C00624	HMDB0001138	70914		0.86	1.3	1.5	1.52	1.75	1.15		0.558919	0.42162	0.216368	0.579607	0.162128	0.648226	0.0126302	0.0464947	0.0209888	0.0720218	0.483232	0.866632		0.9714	0.8332	1.2666	1.4563		100	100	100	100		Amino Acid	Glutamate Metabolism	100000282	5817-08-03
50			N-acetylglutamine	LC/MS polar	33943	C02716	HMDB0006029	182230		0.82	0.82	0.94	1.01	1.14	1.14		0.57396	0.423446	0.644073	0.747594	0.841268	0.868761	0.805671	0.425724	0.366965	0.306851	0.0863605	0.703731		1.1302	0.924	0.9316	1.0574		100	100	100	100		Amino Acid	Glutamate Metabolism	100001253	2490-97-3
57			N-acetyl-aspartyl-glutamate (NAAG)	LC/MS pos early	35665	C12270	HMDB0001067	188803		1.14	0.77	0.75	0.68	0.65	0.96		0.117589	0.15998	0.967309	0.800749	0.935151	0.87517	0.0230909	0.0579896	0.0138917	0.0622439	0.817368	0.936236		1.3607	1.5525	1.0536	1.0152		100	100	100	100		Amino Acid	Glutamate Metabolism	100001612	3106-85-2
61			N-methyl-GABA	LC/MS pos early	39577	C15987		70703		1.84	1.98	1.48	1.07	0.81	0.75		0.0869547	0.131612	0.142234	0.551308	0.137432	0.638125	0.94904	0.469173	0.382799	0.312694	0.455895	0.857653		0.7816	1.4382	1.5451	1.1604		92	100	100	100		Amino Acid	Glutamate Metabolism	100003152	1119-48-8
62			2-pyrrolidinone	LC/MS pos early	31675		HMDB0002039	12025		0.42	0.67	1.55	1.6	3.7	2.31		0.0344824	0.079541	0.496425	0.716481	0.505495	0.76642	0.158994	0.163109	0.0255561	0.0735823	0.226526	0.750316		1.6882	0.7058	1.1283	2.6108		100	100	100	100		Amino Acid	Glutamate Metabolism	100001081	616-45-5
64			S-1-pyrroline-5-carboxylate	LC/MS pos early	42370	C04322	HMDB0001301	11966181		0.76	0.54	1.2	0.7	1.57	2.23		0.310032	0.298307	0.0145273	0.4917	0.537019	0.778204	0.0462162	0.0796612	0.227247	0.233543	0.0104709	0.672423		1.4052	1.0713	0.7549	1.6811		100	100	100	100		Amino Acid	Glutamate Metabolism	35	2906-39-0
72		Histidine Metabolism	histidine	LC/MS neg	59	C00135	HMDB0000177	6274		0.88	0.8	1.11	0.9	1.25	1.39		0.207934	0.235625	0.0496662	0.551308	0.788485	0.860385	0.0674817	0.101356	0.292941	0.272624	0.0455065	0.672423		1.0952	0.9686	0.8726	1.2111		100	100	100	100		Amino Acid	Histidine Metabolism	355	5934-29-2
73			1-methylhistidine	LC/MS neg	30460	C01152	HMDB0000001	92105		0.45	0.54	0.54	1.21	1.2	0.99		0.0733432	0.119946	0.262681	0.595292	0.231241	0.682672	0.207986	0.190496	0.598666	0.400062	0.762204	0.926554		1.9652	0.8797	1.066	1.0554		100	100	100	100		Amino Acid	Histidine Metabolism	100001051	332-80-9
74			3-methylhistidine	LC/MS neg	15677	C01152	HMDB0000479	64969		0.54	0.89	1.23	1.65	2.28	1.38		0.134191	0.17677	0.86064	0.785893	0.488576	0.755964	0.0342998	0.0696603	0.0751776	0.119815	0.519511	0.880178		1.5059	0.8102	1.3354	1.8458		100	100	100	100		Amino Acid	Histidine Metabolism	100000042	368-16-1
80			trans-urocanate	LC/MS pos early	607	C00785	HMDB0000301	736715		0.31	0.57	0.77	1.88	2.5	1.33		9.08561e-05	0.00344547	0.00372873	0.32773	0.137919	0.638125	0.00934041	0.04088	0.00769863	0.0469288	0.488944	0.869177		1.5669	0.4792	0.9	1.1989		100	100	100	100		Amino Acid	Histidine Metabolism	537	104-98-3
82			imidazole propionate	LC/MS pos early	40730		HMDB0002271	70630		1.39	0.88	0.86	0.63	0.62	0.98		0.189603	0.220985	0.806539	0.782098	0.770962	0.854631	0.0720312	0.104312	0.129218	0.159162	0.127934	0.729821		1.6255	2.2515	1.4266	1.3921		100	100	100	100		Amino Acid	Histidine Metabolism	100003434	1074-59-5
83			formiminoglutamate	LC/MS pos early	43493	C00439	HMDB0000854	439233		0.82	0.46	0.95	0.56	1.16	2.06		0.36092	0.326841	0.49176	0.716481	0.980954	0.882192	0.00728818	0.0378015	0.342167	0.295456	0.316437	0.81569		2.1797	1.7798	1.0037	2.0638		100	100	100	100		Amino Acid	Histidine Metabolism	100002500	816-90-0
85			imidazole lactate	LC/MS pos early	15716	C05568	HMDB0002320	793		0.87	0.31	0.68	0.36	0.78	2.18		0.241651	0.255298	0.0795318	0.551308	0.723961	0.849177	0.000199658	0.0181999	0.130504	0.160354	0.230878	0.756157		2.5461	2.2125	0.7931	1.7261		100	100	100	100		Amino Acid	Histidine Metabolism	100000263	14403-45-3
86			carnosine	LC/MS pos early	1768	C00386	HMDB0000033	439224		0.92	1.04	0.98	1.14	1.07	0.94		0.722688	0.46726	0.477136	0.716434	0.847178	0.868761	0.228205	0.200632	0.433442	0.333576	0.367891	0.819254		1.0288	0.9422	1.0709	1.0111		100	100	100	100		Amino Acid	Histidine Metabolism	249	305-84-0
88			N-acetylcarnosine	LC/MS pos early	43488		HMDB0012881	9903482		1.44	1.01	0.96	0.7	0.67	0.95		0.212906	0.238779	0.667215	0.754438	0.46399	0.755964	0.0630233	0.0965214	0.0336897	0.0800209	0.485427	0.866632		1.2466	1.795	1.2619	1.1971		100	100	100	100		Amino Acid	Histidine Metabolism	100004046	56353-15-2
89			anserine	LC/MS neg	15747	C01262	HMDB0000194	112072		1.24	0.87	0.74	0.7	0.6	0.86		0.0936283	0.138538	0.728618	0.773858	0.269878	0.683971	0.0552492	0.0897148	0.0262098	0.0737224	0.193656	0.738344		1.1554	1.4354	1.0029	0.859		100	100	100	100		Amino Acid	Histidine Metabolism	100000044	10030-52-1
90			histamine	LC/MS pos early	1574	C00388	HMDB0000870	774		2.26	0.76	2.76	0.34	1.22	3.63		0.256098	0.265777	0.787394	0.778124	0.472447	0.755964	0.140885	0.152689	0.568864	0.387898	0.414616	0.836554		0.3605	0.8141	0.2747	0.9965		25	43	29	43		Amino Acid	Histidine Metabolism	354	51-45-6
92			1-methylhistamine	LC/MS pos early	43831	C05127	HMDB0000898	3614		1.54	1.24	1.4	0.81	0.91	1.13		0.139385	0.180905	0.493829	0.716481	0.180174	0.648226	0.0238097	0.0589385	0.808053	0.469462	0.397572	0.825559		0.9456	1.4515	1.1748	1.3243		100	100	100	100		Amino Acid	Histidine Metabolism	100001204	501-75-7
93			1-methyl-4-imidazoleacetate	LC/MS pos early	32350	C05828	HMDB0002820	75810		0.28	0.51	0.57	1.84	2.06	1.12		0.000115115	0.00344547	0.0280823	0.519117	0.0668076	0.577955	0.00165094	0.0274573	0.00563073	0.0449856	0.392667	0.825559		1.9682	0.5476	1.0077	1.1271		100	100	100	100		Amino Acid	Histidine Metabolism	100001208	2625-49-2
94			1-methyl-5-imidazoleacetate	LC/MS pos early	62946		HMDB04988	6451814		0.72	0.79	0.92	1.09	1.27	1.17		0.603094	0.432754	0.953061	0.798344	0.779575	0.85544	0.550254	0.341796	0.364294	0.305125	0.743304	0.923804		1.3227	0.958	1.0477	1.2207		100	100	100	100		Amino Acid	Histidine Metabolism	100002910	4200-48-0
95			1-methyl-5-imidazolelactate	LC/MS neg	64596					0.46	0.32	0.38	0.7	0.82	1.17		0.64204	0.444495	0.15527	0.568634	0.281572	0.691308	0.0416837	0.0748884	0.296341	0.27391	0.634057	0.920108		2.5776	1.1922	0.8352	0.9786		100	100	100	100		Amino Acid	Histidine Metabolism	100021478	2022510-60-5
98			1-ribosyl-imidazoleacetate*	LC/MS pos early	61868	C05131	HMDB0002331	440569		0.37	0.6	0.58	1.63	1.6	0.98		0.00697112	0.0328786	0.0735462	0.551308	0.0559301	0.577955	0.0195139	0.0542571	0.0218987	0.0724022	0.954293	0.950247		1.8969	0.6941	1.1287	1.1089		100	100	100	100		Amino Acid	Histidine Metabolism	100001668	29605-99-0
99			4-imidazoleacetate	LC/MS pos early	32349	C02835	HMDB0002024	96215		0.79	0.55	0.97	0.7	1.23	1.77		0.641767	0.444495	0.206693	0.579607	0.885127	0.872229	0.140505	0.152632	0.62676	0.41066	0.133071	0.734339		1.4718	1.1625	0.8115	1.4348		100	100	100	100		Amino Acid	Histidine Metabolism	100001207	645-65-8
103			N-acetylhistamine	LC/MS pos early	48679	C05135	HMDB0013253	69602		0.32	0.4	0.48	1.25	1.51	1.2		0.211828	0.238076	0.697442	0.768389	0.934851	0.87517	0.0992962	0.123687	0.100976	0.138888	0.323111	0.81569		2.9612	0.9342	1.1715	1.4089		92	86	100	100		Amino Acid	Histidine Metabolism	100006123	673-49-4
107		Lysine Metabolism	lysine	LC/MS pos early	1301	C00047 C00739	HMDB0003405	5962		1.12	0.82	1.08	0.73	0.97	1.32		0.232219	0.25034	0.202673	0.579607	0.568219	0.792044	0.014697	0.049076	0.621409	0.408626	0.13958	0.734339		1.0418	1.1628	0.8505	1.1239		100	100	100	100		Amino Acid	Lysine Metabolism	407	56-87-1
109			N6-acetyllysine	LC/MS neg	36752	C02727	HMDB0000206	92832		0.68	1.05	1.13	1.54	1.67	1.08		0.0186196	0.056058	0.602583	0.739018	0.595021	0.802324	0.0127512	0.0464947	0.0426812	0.0912737	0.789114	0.935671		1.1528	0.7834	1.2101	1.3053		100	100	100	100		Amino Acid	Lysine Metabolism	100001734	692-04-6
116			N6-methyllysine	LC/MS pos early	62860	C02728	HMDB0002038	164795		0.99	1.33	1.03	1.34	1.04	0.77		0.831648	0.495273	0.186226	0.579607	0.614124	0.807658	0.0780199	0.109442	0.728688	0.441737	0.215939	0.743264		0.994	0.9825	1.3199	1.0215		100	100	100	100		Amino Acid	Lysine Metabolism	100003415	1188-07-4
117			N6,N6-dimethyllysine	LC/MS pos early	62862	C05545	HMDB0013287	193344		0.6	0.99	1.02	1.65	1.69	1.02		0.0725089	0.119321	0.657853	0.751486	0.536691	0.778204	0.0252226	0.0601398	0.028433	0.0757205	0.600137	0.920108		1.0297	0.6211	1.0236	1.0467		92	71	100	100		Amino Acid	Lysine Metabolism	100020417	2259-86-1
118			N6,N6,N6-trimethyllysine	LC/MS pos early	1498	C03793	HMDB0001325	440120		0.82	0.68	0.69	0.83	0.84	1.01		0.556241	0.420354	0.106624	0.551308	0.104265	0.617178	0.106087	0.129049	0.0908039	0.132486	0.811153	0.935671		1.312	1.0728	0.8947	0.8994		100	100	100	100		Amino Acid	Lysine Metabolism	189	23284-33-5
121			5-hydroxylysine	LC/MS pos early	15685	C16741	HMDB0000450	3032849		0.37	0.73	1.59	1.99	4.35	2.19		0.237466	0.25303	0.785888	0.778124	0.327994	0.72078	0.31188	0.242055	0.0513405	0.09944	0.154313	0.734339		2.203	0.8083	1.6055	3.5125		100	100	100	100		Amino Acid	Lysine Metabolism	100000054	13204-98-3
122			5-(galactosylhydroxy)-lysine	LC/MS pos early	43582			66995551		0.74	0.74	0.75	1	1.02	1.02		0.903108	0.519381	0.761626	0.778124	0.807907	0.866266	0.748549	0.412014	0.761454	0.456099	0.915858	0.942048		1.3715	1.0187	1.0193	1.0346		100	100	100	100		Amino Acid	Lysine Metabolism	100002462	32448-36-5
123			fructosyllysine	LC/MS pos early	46227		HMDB0034879	9839580		1.35	0.96	1.19	0.71	0.88	1.24		0.00936756	0.038963	0.898517	0.789259	0.269251	0.683971	0.0211989	0.0556309	0.135106	0.1652	0.214364	0.743264		0.9271	1.256	0.8908	1.1042		100	100	100	100		Amino Acid	Lysine Metabolism	100005373	21291-40-7
125			2-aminoadipate	LC/MS neg	6146	C00956	HMDB0000510	92136		0.99	0.79	0.8	0.8	0.81	1.01		0.910195	0.519783	0.291636	0.618352	0.331485	0.72078	0.0597968	0.0934691	0.0331825	0.0796445	0.962639	0.951529		1.2519	1.2404	0.9946	1.0068		100	100	100	100		Amino Acid	Lysine Metabolism	381	542-32-5;1118-90-7
127			2-oxoadipate	LC/MS polar	38347	C00322	HMDB0000225	71		1.39	1.12	1.06	0.8	0.76	0.95		0.00881989	0.0375725	0.51745	0.720287	0.910678	0.87517	0.0579049	0.0923145	0.154122	0.179331	0.694247	0.920108		0.887	1.2372	0.9911	0.9416		100	100	100	100		Amino Acid	Lysine Metabolism	92	3184-35-8
129			glutarylcarnitine (C5-DC)	LC/MS pos early	44664		HMDB0013130	71317118		0.6	0.42	0.38	0.69	0.64	0.92		0.689595	0.458201	0.130615	0.551308	0.0752765	0.577955	0.132333	0.147177	0.0429051	0.0913636	0.361806	0.818807		2.0691	1.2472	0.8628	0.7956		92	100	86	100		Amino Acid	Lysine Metabolism	100001593	102636-82-8
133			pipecolate	LC/MS pos early	1444		HMDB0000070			0.65	1	1.14	1.53	1.74	1.13		0.154136	0.195642	0.858823	0.785893	0.641437	0.820034	0.0253632	0.0601398	0.0340409	0.0803153	0.583178	0.920108		1.345	0.8805	1.3508	1.5311		100	100	100	100		Amino Acid	Lysine Metabolism	1025	4043-87-2
135			6-oxopiperidine-2-carboxylate	LC/MS neg	43231		HMDB0061705	3014237		0.67	0.68	0.68	1.03	1.02	1		0.430853	0.367085	0.757738	0.778124	0.712725	0.849177	0.477733	0.312981	0.554116	0.384778	0.936599	0.94919		1.7831	1.1872	1.2188	1.216		100	100	100	100		Amino Acid	Lysine Metabolism	100004499	34622-39-4
137			N-acetyl-cadaverine	LC/MS pos early	43530		HMDB0002284	10374713		0.88	0.66	0.7	0.75	0.79	1.05		0.515723	0.400938	0.639197	0.744668	0.995517	0.887233	0.0854413	0.115017	0.221734	0.229756	0.305309	0.802204		1.9555	1.722	1.2896	1.3593		100	100	100	100		Amino Acid	Lysine Metabolism	100002249	32343-73-0
138			5-aminovalerate	LC/MS pos early	18319	C00431	HMDB0003355	138		1.51	2.68	3.49	1.77	2.31	1.3		0.958092	0.531618	0.372479	0.669085	0.611688	0.80654	0.205987	0.189781	0.558329	0.38501	0.638223	0.920108		1.1692	1.7662	3.1309	4.0765		100	100	100	100		Amino Acid	Lysine Metabolism	100000454	660-88-8
139			N,N-dimethyl-5-aminovalerate	LC/MS pos early	62819					0.5	0.57	1.06	1.13	2.11	1.86		0.604878	0.432754	0.989036	0.808857	0.479621	0.755964	0.183971	0.179251	0.068009	0.11469	0.198791	0.743264		1.9474	0.9805	1.1114	2.0715		100	100	100	100		Amino Acid	Lysine Metabolism	100020842
140			N,N,N-trimethyl-5-aminovalerate	LC/MS pos early	57687			14274897		1.79	1.36	1.34	0.76	0.75	0.99		0.0697102	0.11653	0.102374	0.551308	0.0826067	0.577955	0.244629	0.208521	0.397527	0.32012	0.91464	0.942048		0.829	1.4865	1.1242	1.1141		100	100	100	100		Amino Acid	Lysine Metabolism	100015962
142		Phenylalanine Metabolism	phenylalanine	LC/MS pos early	64	C00079	HMDB0000159	6140		1.11	0.82	0.96	0.74	0.87	1.17		0.0335983	0.0785305	0.00668711	0.442297	0.458949	0.753573	0.000350662	0.0181999	0.00511795	0.0449856	0.00924261	0.672423		1.0195	1.1278	0.8355	0.9757		100	100	100	100		Amino Acid	Phenylalanine Metabolism	460	63-91-2
144			N-acetylphenylalanine	LC/MS neg	33950	C03519	HMDB0000512	74839		1.03	0.83	1.05	0.8	1.02	1.27		0.654362	0.448907	0.201621	0.579607	0.845146	0.868761	0.00205422	0.0274573	0.888285	0.486284	0.20358	0.743264		1.0743	1.1098	0.8896	1.1289		100	100	100	100		Amino Acid	Phenylalanine Metabolism	100001256	2018-61-3
155			phenylpyruvate	LC/MS polar	566	C00166	HMDB0000205	997		1.34	1.29	1.45	0.96	1.08	1.13		0.0265392	0.069401	0.205107	0.579607	0.355009	0.72078	0.395158	0.277737	0.635115	0.413763	0.998732	0.954738		0.9105	1.2195	1.1748	1.3218		100	100	100	100		Amino Acid	Phenylalanine Metabolism	241	156-06-9
156			phenyllactate (PLA)	LC/MS neg	22130	C05607	HMDB0000779 HMDB0000563	3848		0.55	0.4	0.55	0.72	1.01	1.39		0.206959	0.235104	0.0253414	0.519117	0.184969	0.652763	0.0597229	0.0934691	0.634185	0.413763	0.0272325	0.672423		2.0443	1.1176	0.8097	1.1295		100	100	100	100		Amino Acid	Phenylalanine Metabolism	100000774	828-01-3
160			phenylacetate	LC/MS neg	57745	C07086	HMDB0000209	999		3.34	3.37	2.36	1.01	0.7	0.7		0.10044	0.144943	0.13379	0.551308	0.0900719	0.577955	0.804574	0.425625	0.609907	0.405235	0.590748	0.920108		0.6631	2.2162	2.2318	1.562		75	86	86	100		Amino Acid	Phenylalanine Metabolism	100000011	103-82-2
161			2-hydroxyphenylacetate	LC/MS polar	1432	C05852	HMDB0000669	11970		1.25	1.54	1.37	1.23	1.09	0.89		0.402606	0.349516	0.104789	0.551308	0.0467884	0.577955	0.0999503	0.123841	0.146819	0.175257	0.614561	0.920108		0.8715	1.0911	1.3429	1.1913		100	100	100	100		Amino Acid	Phenylalanine Metabolism	235	614-75-5
167		Tyrosine Metabolism	tyrosine	LC/MS pos early	1299	C00082	HMDB0000158	6057		1.18	0.84	1.01	0.71	0.86	1.21		0.0775099	0.123324	0.0671929	0.551308	0.826142	0.868761	0.0113995	0.0447096	0.245023	0.245567	0.0911661	0.703731		1.0157	1.1937	0.849	1.0297		100	100	100	100		Amino Acid	Tyrosine Metabolism	815	60-18-4
168			N-acetyltyrosine	LC/MS neg	32390		HMDB0000866	68310		0.99	0.81	0.78	0.82	0.79	0.97		0.632439	0.443561	0.477375	0.716434	0.357419	0.72078	0.0362246	0.071699	0.0625584	0.109542	0.682384	0.920108		1.1828	1.1696	0.9548	0.9216		100	100	100	86		Amino Acid	Tyrosine Metabolism	100001104	537-55-3
176			m-tyramine sulfate	LC/MS neg	48417					0.46	0.76	1.06	1.66	2.33	1.4		0.0108498	0.0425646	0.266767	0.595292	0.667695	0.832409	0.0935837	0.120787	0.0210671	0.0720218	0.299002	0.795136		1.3617	0.6202	1.0301	1.4428		100	71	100	86		Amino Acid	Tyrosine Metabolism	100006104	175727-14-7
186			3-(4-hydroxyphenyl)lactate	LC/MS neg	32197	C03672	HMDB0000755	9378		1.17	0.78	0.8	0.67	0.69	1.03		0.145552	0.187071	0.175789	0.579607	0.236018	0.682672	0.00244738	0.027883	0.00480126	0.0438702	0.915232	0.942048		1.0403	1.2122	0.8123	0.8333		100	100	100	100		Amino Acid	Tyrosine Metabolism	240	6482-98-0
195			phenol sulfate	LC/MS neg	32553	C02180	HMDB0060015	74426		1.03	1.39	0.7	1.36	0.68	0.5		0.896847	0.517192	0.563169	0.726638	0.996531	0.887233	0.659775	0.379671	0.844282	0.480977	0.159777	0.734339		1.7981	1.8465	2.5062	1.2626		100	100	100	100		Amino Acid	Tyrosine Metabolism	100001510	937-34-8
198			4-methoxyphenol sulfate	LC/MS neg	48457					0.17	0.31	0.38	1.82	2.24	1.23		0.0830258	0.129088	0.605064	0.739766	0.910018	0.87517	0.0910648	0.119896	0.0139509	0.0622439	0.650277	0.920108		3.7943	0.6365	1.1592	1.4267		92	71	100	86		Amino Acid	Tyrosine Metabolism	100006262	3233-60-1
206			vanillactate	LC/MS neg	54910		HMDB0000913	160637		0.76	0.86	0.89	1.13	1.17	1.03		0.697947	0.459894	0.845741	0.785893	0.661657	0.829943	0.869491	0.44583	0.245165	0.245567	0.389157	0.825559		1.0775	0.8185	0.9282	0.9584		75	71	57	100		Amino Acid	Tyrosine Metabolism	100006129	2475-56-1
209			3-methoxytyrosine	LC/MS pos early	12017		HMDB0001434	9307		1.04	1.1	1.1	1.05	1.05	1		0.36479	0.327714	0.193773	0.579607	0.209713	0.662551	0.2084	0.190502	0.524763	0.374068	0.957095	0.950247		0.9577	0.9975	1.0497	1.0513		100	100	100	100		Amino Acid	Tyrosine Metabolism	1342	300-48-1
211			3-methoxytyramine sulfate	LC/MS neg	44618			54133459		0.51	0.84	1.05	1.66	2.08	1.26		0.000179956	0.004708	0.396938	0.67404	0.846459	0.868761	0.0473935	0.081092	0.00332145	0.0408052	0.407738	0.833183		1.1078	0.56	0.9291	1.1669		100	29	71	86		Amino Acid	Tyrosine Metabolism	100004634
229			dopamine 3-O-sulfate	LC/MS neg	48407	C13690	HMDB0006275	122136		0.64	0.86	1.31	1.35	2.05	1.52		0.184618	0.218247	0.855207	0.785893	0.683338	0.84334	0.0239995	0.0590025	0.0256233	0.0735823	0.398758	0.825559		1.1711	0.751	1.0108	1.5392		100	86	100	100		Amino Acid	Tyrosine Metabolism	100006361
235			4-hydroxycinnamate sulfate	LC/MS neg	48410			6070438		0.2	0.34	0.26	1.73	1.33	0.77		0.0890804	0.133302	0.282283	0.606261	0.2683	0.683971	0.510559	0.327383	0.27105	0.262457	0.970882	0.952347		4.8753	0.9537	1.6523	1.2728		83	43	100	86		Amino Acid	Tyrosine Metabolism	100006095	376374-66-2
237			4-hydroxyphenylacetate sulfate	LC/MS neg	53027					0.21	0.49	0.44	2.34	2.14	0.91		0.0189667	0.0562861	0.53531	0.726638	0.373526	0.736869	0.111285	0.133288	0.155786	0.180391	0.780882	0.931556		2.3723	0.4911	1.1514	1.0497		100	100	100	100		Amino Acid	Tyrosine Metabolism	100006633
250			thyroxine	LC/MS neg	2761	C01829	HMDB0000248	5819		11.25	0.94	0.88	0.08	0.08	0.93		1.62044e-05	0.00194065	0.419371	0.681928	0.424466	0.744374	2.72498e-05	0.0127288	2.4778e-05	0.00761725	0.74053	0.923804		0.672	7.5603	0.6338	0.5881		75	100	29	57		Amino Acid	Tyrosine Metabolism	1094	51-48-9
259		Tryptophan Metabolism	tryptophan	LC/MS pos early	54	C00078	HMDB0000929	6305		1.13	1.01	1.09	0.89	0.96	1.08		0.0993941	0.144638	0.984052	0.807624	0.251402	0.682672	0.145092	0.155446	0.553119	0.384778	0.16119	0.734339		0.9627	1.0915	0.9707	1.0491		100	100	100	100		Amino Acid	Tryptophan Metabolism	565	73-22-3
260			N-acetyltryptophan	LC/MS neg	33959	C03137	HMDB0013713	439917;700653		0.41	0.53	0.55	1.27	1.34	1.05		0.0323819	0.076363	0.176629	0.579607	0.252418	0.682672	0.205503	0.189781	0.328955	0.289981	0.833555	0.94052		2.0666	0.8535	1.085	1.1414		100	100	100	100		Amino Acid	Tryptophan Metabolism	100001254	1218-34-4
266			C-glycosyltryptophan	LC/MS neg	48782		HMDB0240296	10981970		0.74	0.72	0.74	0.97	0.99	1.02		0.592488	0.42932	0.495643	0.716481	0.538614	0.778204	0.545747	0.340355	0.789612	0.464015	0.971567	0.952347		1.3916	1.0304	1.0044	1.0246		100	100	100	100		Amino Acid	Tryptophan Metabolism	100006379	180509-18-6
268			oxindolylalanine	LC/MS pos early	64568			20977764		0.55	0.78	0.89	1.43	1.63	1.14		0.090745	0.135409	0.743494	0.773858	0.664368	0.829943	0.218392	0.196213	0.0389724	0.0855261	0.256285	0.782573		1.6033	0.8769	1.2561	1.4272		100	100	100	100		Amino Acid	Tryptophan Metabolism	100022120
269			tryptophan betaine	LC/MS pos early	37097	C09213	HMDB0061115	442106		10.51	10.65	8.72	1.01	0.83	0.82		0.17201	0.210817	0.138549	0.551308	0.0287576	0.552106	0.778219	0.417355	0.240794	0.244178	0.593475	0.920108		0.5609	5.8928	5.9748	4.8887		67	100	86	100		Amino Acid	Tryptophan Metabolism	100001743	20671-76-5
272			kynurenine	LC/MS pos early	15140	C00328	HMDB0000684	161166		1.21	1.01	1.1	0.84	0.91	1.09		0.398799	0.347625	0.910831	0.789259	0.756711	0.854631	0.0289938	0.0638839	0.263091	0.258234	0.110798	0.703731		0.9953	1.2047	1.0066	1.0978		100	100	100	100		Amino Acid	Tryptophan Metabolism	100000265	2922-83-0
275			N-acetylkynurenine (2)	LC/MS neg	48757		HMDB0240342	73817779		0.31	0.32	0.53	1.05	1.7	1.63		0.0372852	0.0833457	0.0474625	0.551308	0.367895	0.732586	0.414012	0.285412	0.251349	0.250128	0.359643	0.815898		2.7181	0.8398	0.8782	1.4271		100	100	100	100		Amino Acid	Tryptophan Metabolism	100006378
277			kynurenate	LC/MS neg	1417	C01717	HMDB0000715	3845		0.96	0.76	0.8	0.8	0.84	1.06		0.819316	0.491035	0.143519	0.551308	0.239674	0.682672	0.0147794	0.049076	0.0359696	0.0821601	0.796536	0.935671		1.118	1.0687	0.8505	0.8981		100	100	100	100		Amino Acid	Tryptophan Metabolism	98	492-27-3
280			anthranilate	LC/MS pos early	4970	C00108	HMDB0001123	227		0.95	0.9	1.27	0.95	1.34	1.41		0.975024	0.535389	0.742681	0.773858	0.536584	0.778204	0.757632	0.412014	0.459766	0.345251	0.0854406	0.703731		1.0615	1.0056	0.9585	1.348		100	100	86	100		Amino Acid	Tryptophan Metabolism	1258	118-92-3
287			picolinate	LC/MS pos early	1512	C10164	HMDB0002243	1018		1.01	1	1.11	0.99	1.1	1.11		0.939051	0.528829	0.784229	0.778124	0.487988	0.755964	0.808747	0.426384	0.509435	0.36731	0.451548	0.855403		1.2416	1.2503	1.2391	1.3756		100	100	100	100		Amino Acid	Tryptophan Metabolism	1022	98-98-6
292			serotonin	LC/MS pos early	2342	C00780	HMDB0000259	5202		1.37	0.98	0.78	0.71	0.57	0.8		0.0441838	0.0899982	0.88172	0.786109	0.604962	0.80654	0.0720636	0.104312	0.0155469	0.0643676	0.0961651	0.703731		0.9369	1.2874	0.9166	0.7353		100	100	100	100		Amino Acid	Tryptophan Metabolism	504	153-98-0
295			5-hydroxyindoleacetate	LC/MS neg	437	C05635	HMDB0000763	1826		0.84	0.67	0.8	0.79	0.95	1.2		0.912724	0.520103	0.347749	0.645735	0.646301	0.823242	0.324521	0.249322	0.615055	0.407776	0.521061	0.881199		1.2788	1.0752	0.8523	1.0221		100	86	71	71		Amino Acid	Tryptophan Metabolism	71	54-16-0
303			indolelactate	LC/MS pos early	18349	C02043	HMDB0000671	92904		1.19	0.78	0.82	0.65	0.69	1.06		0.18928	0.220985	0.156811	0.57132	0.281421	0.691308	0.0134731	0.0464947	0.0483871	0.0965793	0.763047	0.926554		1.0861	1.2933	0.8468	0.8937		100	100	100	100		Amino Acid	Tryptophan Metabolism	100000463	832-97-3
304			indoleacetate	LC/MS neg	27513	C00954	HMDB0000197	802		0.4	0.43	0.44	1.09	1.12	1.02		0.0203674	0.0587913	0.0212447	0.519117	0.0299536	0.552106	0.539863	0.339404	0.665525	0.420154	0.861797	0.942048		2.0477	0.8165	0.8896	0.9112		100	100	100	100		Amino Acid	Tryptophan Metabolism	100001034	87-51-4;6505-45-9
309			indoleacrylate	LC/MS neg	22114		HMDB0000734	5375048		0.45	0.64	0.45	1.42	1	0.7		0.742922	0.470961	0.474198	0.71493	0.97213	0.882192	0.169086	0.16949	0.188442	0.205425	0.267664	0.785378		1.9997	0.8946	1.2747	0.8957		92	100	100	100		Amino Acid	Tryptophan Metabolism	100000800	1204-06-4
310			indolepropionate	LC/MS pos early	32405		HMDB0002302	3744		0.28	0.76	0.54	2.76	1.95	0.71		0.0989268	0.144356	0.620551	0.742984	0.84641	0.868761	0.0412896	0.0745973	0.0245187	0.0732182	0.316607	0.81569		2.494	0.6902	1.9018	1.3467		83	100	100	100		Amino Acid	Tryptophan Metabolism	100001083	830-96-6
321			indole-3-carboxylate	LC/MS neg	38116	C19837	HMDB0003320	69867		1.23	0.62	0.88	0.5	0.72	1.43		0.314323	0.301169	0.630266	0.743608	0.330718	0.72078	0.0326627	0.068726	0.666211	0.420154	0.0429922	0.672423		0.8952	1.1038	0.5506	0.7898		33	71	29	86		Amino Acid	Tryptophan Metabolism	100002185	771-50-6
323			indoleacetylglycine	LC/MS neg	54730			446640		0.2	0.32	0.28	1.64	1.4	0.85		0.0011214	0.0110258	0.0244359	0.519117	0.00692734	0.491602	0.0448865	0.0782354	0.14023	0.170223	0.633931	0.920108		3.2314	0.637	1.0434	0.8914		100	100	100	100		Amino Acid	Tryptophan Metabolism	100006730	13113-08-1
325			5-hydroxyindole sulfate	LC/MS neg	52914					0.98	1.58	1.7	1.61	1.73	1.07		0.471475	0.384337	0.329023	0.633259	0.239195	0.682672	0.414294	0.285412	0.327069	0.289379	0.773797	0.931556		1.0415	1.0235	1.65	1.7728		83	100	100	100		Amino Acid	Tryptophan Metabolism	100009042
326			7-hydroxyindole sulfate	LC/MS neg	52915					2.05	2.15	1.69	1.05	0.82	0.79		0.0450179	0.0899982	0.0504833	0.551308	0.212449	0.666241	0.804495	0.425625	0.232291	0.238239	0.185935	0.734339		0.7394	1.5158	1.5888	1.2476		67	100	86	100		Amino Acid	Tryptophan Metabolism	100009043
327			3-indoxyl sulfate	LC/MS neg	27672		HMDB0000682	10258		0.96	1.27	1.22	1.33	1.28	0.97		0.287904	0.285332	0.313678	0.620283	0.341247	0.72078	0.787209	0.420727	0.930608	0.500457	0.840492	0.94052		1.091	1.042	1.3823	1.3344		100	100	100	100		Amino Acid	Tryptophan Metabolism	100000467	2642-37-7
332			6-bromotryptophan	LC/MS neg	62503			9856996		0.9	0.96	1	1.06	1.11	1.04		0.491184	0.391345	0.551668	0.726638	0.668453	0.832409	0.734696	0.407585	0.962415	0.508045	0.305291	0.802204		1.1007	0.9944	1.0541	1.099		100	100	100	100		Amino Acid	Tryptophan Metabolism	100020414
337		Leucine, Isoleucine and Valine Metabolism	leucine	LC/MS pos early	60	C00123	HMDB0000687	6106		1.03	0.84	1.01	0.81	0.98	1.21		0.693311	0.458938	0.216784	0.579607	0.76942	0.854631	0.0261935	0.0605338	0.889261	0.486284	0.0928598	0.703731		1.1157	1.1505	0.9361	1.1286		100	100	100	100		Amino Acid	Leucine, Isoleucine and Valine Metabolism	397	61-90-5
341			N-acetylleucine	LC/MS neg	1587	C02710	HMDB0011756	70912		1.07	0.82	1.13	0.77	1.06	1.37		0.568627	0.422203	0.224437	0.579607	0.466116	0.755964	0.00950604	0.0411148	0.823194	0.476057	0.163125	0.734339		1.0552	1.1244	0.8698	1.1955		100	100	100	100		Amino Acid	Leucine, Isoleucine and Valine Metabolism	1082	1188-21-2
347			N-methylleucine	LC/MS pos early	35666			2777993		0.81	0.67	0.93	0.83	1.15	1.39		0.350582	0.323435	0.121	0.551308	0.757516	0.854631	0.275407	0.2253	0.667068	0.420154	0.129737	0.729821		1.2163	0.988	0.8157	1.1354		100	100	57	100		Amino Acid	Leucine, Isoleucine and Valine Metabolism	100001581	66866-69-1
348			4-methyl-2-oxopentanoate	LC/MS neg	22116	C00233	HMDB0000695	70		1.4	0.99	1.01	0.71	0.72	1.02		0.105603	0.149154	0.883643	0.786109	0.944274	0.877486	0.0309853	0.0666151	0.0659865	0.113377	0.929124	0.94919		0.9611	1.3435	0.9494	0.9675		100	100	100	100		Amino Acid	Leucine, Isoleucine and Valine Metabolism	100000551	816-66-0
352			alpha-hydroxyisocaproate	LC/MS neg	22132	C03264	HMDB0000665 HMDB0000624 HMDB00746	92779;83697;439960		0.79	0.68	0.92	0.87	1.17	1.34		0.219421	0.241825	0.0677912	0.551308	0.649487	0.823687	0.298842	0.235401	0.316938	0.284422	0.00462506	0.672423		1.2726	0.9998	0.87	1.1671		100	100	100	100		Amino Acid	Leucine, Isoleucine and Valine Metabolism	100000706	10303-64-7
356			isovalerate (i5:0)	LC/MS neg	44656	C08262	HMDB0000718	10430		1.17	1.26	1.23	1.08	1.05	0.97		0.189532	0.220985	0.729747	0.773858	0.307026	0.712315	0.638234	0.373931	0.993098	0.516645	0.657251	0.920108		0.9217	1.0814	1.1636	1.1309		100	100	100	100		Amino Acid	Leucine, Isoleucine and Valine Metabolism	100000708	503-74-2
358			isovalerylglycine	LC/MS neg	35107		HMDB00678	546304		0.62	1.71	1.11	2.75	1.79	0.65		0.11741	0.15998	0.161153	0.579607	0.428051	0.744374	0.0105502	0.0436119	0.00983379	0.0549104	0.289715	0.795136		1.1237	0.6971	1.9196	1.2452		100	100	100	100		Amino Acid	Leucine, Isoleucine and Valine Metabolism	100001452	16284-60-9
359			isovalerylcarnitine (C5)	LC/MS pos early	34407	C20826	HMDB0000688	169235		0.71	0.77	0.78	1.09	1.1	1.01		0.199464	0.229053	0.318163	0.623928	0.355139	0.72078	0.984537	0.477832	0.565267	0.386508	0.65161	0.920108		1.5212	1.0751	1.1739	1.1832		100	100	100	100		Amino Acid	Leucine, Isoleucine and Valine Metabolism	100001393	31023-24-2
368			beta-hydroxyisovalerate	LC/MS neg	12129		HMDB0000754	69362		0.84	0.96	0.88	1.15	1.05	0.91		0.418115	0.358545	0.957215	0.798344	0.529564	0.778204	0.232402	0.202912	0.948027	0.504501	0.295093	0.795136		1.1349	0.9527	1.0932	0.9981		100	100	100	100		Amino Acid	Leucine, Isoleucine and Valine Metabolism	1442	625-08-1
369			beta-hydroxyisovaleroylcarnitine	LC/MS pos early	35433					0.92	0.67	0.74	0.72	0.8	1.1		0.955109	0.531618	0.174942	0.579607	0.347082	0.72078	0.0161485	0.0513142	0.0785709	0.121869	0.728269	0.923804		1.2864	1.1897	0.8604	0.95		100	100	100	100		Amino Acid	Leucine, Isoleucine and Valine Metabolism	100001594	99159-87-2
372			3-methylglutaconate	LC/MS polar	57747		HMDB0000522	1551553		0.49	0.56	0.57	1.13	1.16	1.03		0.0218313	0.0613409	0.0676318	0.551308	0.0853019	0.577955	0.344293	0.260654	0.179948	0.19919	0.394275	0.825559		1.7745	0.874	0.9868	1.0179		100	100	100	100		Amino Acid	Leucine, Isoleucine and Valine Metabolism	100002458	5746-90-7
386			5-methylnorleucine	LC/MS pos early	43546			94817		1.22	1.07	1.03	0.88	0.84	0.96		0.175682	0.213829	0.345958	0.645735	0.325215	0.72078	0.0688736	0.102133	0.312316	0.282326	0.909004	0.942048		1.1255	1.3738	1.2073	1.1578		100	100	100	100		Amino Acid	Leucine, Isoleucine and Valine Metabolism	100004549	31872-98-7
390			isoleucine	LC/MS pos early	1125	C16424 C00407 C06418	HMDB0000172	6306		1.17	0.92	1.08	0.79	0.93	1.17		0.130235	0.172852	0.600351	0.739018	0.298093	0.705706	0.00931174	0.04088	0.378984	0.311205	0.0532351	0.703731		0.9947	1.1623	0.9179	1.0761		100	100	100	100		Amino Acid	Leucine, Isoleucine and Valine Metabolism	376	73-32-5
392			N-acetylisoleucine	LC/MS neg	33967		HMDB0061684	306109		1.02	0.96	1.23	0.95	1.21	1.28		0.607071	0.433006	0.85702	0.785893	0.151634	0.648226	0.496545	0.321248	0.277327	0.266756	0.0983979	0.703731		0.9828	0.9987	0.9476	1.212		100	100	100	100		Amino Acid	Leucine, Isoleucine and Valine Metabolism	100001276	3077-46-1
399			3-methyl-2-oxovalerate	LC/MS neg	15676	C00671 C06008 C03465	HMDB0000491	440877;439286		1.63	1.04	1.08	0.64	0.66	1.04		0.0142252	0.0504313	0.695132	0.767697	0.650543	0.823687	0.00724325	0.0378015	0.0247936	0.0732182	0.883571	0.942048		0.9466	1.5432	0.9837	1.0189		100	100	100	100		Amino Acid	Leucine, Isoleucine and Valine Metabolism	100000036	1460-34-0;51829-07-3
400			2-hydroxy-3-methylvalerate	LC/MS neg	36746		HMDB0000317	164623		0.76	0.76	1.19	1	1.57	1.57		0.316935	0.301652	0.287438	0.614526	0.487066	0.755964	0.697174	0.393308	0.0827139	0.125962	0.0378708	0.672423		1.2017	0.9113	0.9097	1.4291		100	100	100	100		Amino Acid	Leucine, Isoleucine and Valine Metabolism	100001541	488-15-3
402			2-methylbutyrylcarnitine (C5)	LC/MS pos early	45095		HMDB0000378	6426901		0.98	0.76	0.94	0.77	0.96	1.24		0.906586	0.519406	0.19811	0.579607	0.752713	0.854631	0.0839193	0.114193	0.863745	0.484353	0.154693	0.734339		1.1565	1.1371	0.8746	1.0875		100	100	100	100		Amino Acid	Leucine, Isoleucine and Valine Metabolism	100001509	31023-25-3
405			tiglylcarnitine (C5:1-DC)	LC/MS pos early	35428		HMDB0002366	22833596		1.02	0.92	1	0.9	0.98	1.09		0.582177	0.42653	0.986238	0.808448	0.932719	0.87517	0.290121	0.232054	0.418445	0.327212	0.914777	0.942048		1.0242	1.0461	0.9388	1.0232		75	100	86	86		Amino Acid	Leucine, Isoleucine and Valine Metabolism	100001597	64191-86-2
410			3-hydroxy-2-ethylpropionate	LC/MS neg	32397		HMDB0000396	188979		0.81	0.88	0.57	1.09	0.71	0.65		0.82	0.491035	0.859871	0.785893	0.256472	0.682672	0.986687	0.478106	0.0043039	0.0408052	0.0223155	0.672423		1.4117	1.1365	1.2387	0.8043		100	100	100	100		Amino Acid	Leucine, Isoleucine and Valine Metabolism	100001170	4374-62-3
412			ethylmalonate	LC/MS polar	15765		HMDB0000622	11756		0.75	0.91	0.8	1.22	1.07	0.88		0.355474	0.325433	0.914291	0.789259	0.536326	0.778204	0.0486375	0.0828407	0.465956	0.346656	0.114919	0.711613		1.2303	0.924	1.1249	0.9887		100	100	100	100		Amino Acid	Leucine, Isoleucine and Valine Metabolism	2054	601-75-2
415			methylsuccinate	LC/MS polar	15745		HMDB0001844	10349		0.6	0.8	0.85	1.34	1.43	1.07		0.00908772	0.0384038	0.318653	0.623928	0.53196	0.778204	0.0651244	0.0984482	0.0242865	0.0732182	0.395579	0.825559		1.3429	0.8042	1.0765	1.1477		100	100	100	100		Amino Acid	Leucine, Isoleucine and Valine Metabolism	2051	498-21-5
421			valine	LC/MS pos early	1649	C00183	HMDB0000883	6287		1.12	0.91	0.99	0.82	0.89	1.09		0.239312	0.253334	0.508201	0.720287	0.925141	0.87517	0.00587864	0.03673	0.0738032	0.118497	0.13025	0.729821		1.0445	1.1652	0.9498	1.0361		100	100	100	100		Amino Acid	Leucine, Isoleucine and Valine Metabolism	566	72-18-4
422			N-acetylvaline	LC/MS neg	1591		HMDB0011757	66789		0.91	0.86	0.91	0.95	1	1.05		0.726864	0.468812	0.432032	0.689832	0.719299	0.849177	0.430532	0.291459	0.930066	0.500457	0.491329	0.869177		1.1266	1.0201	0.9706	1.0212		100	100	100	100		Amino Acid	Leucine, Isoleucine and Valine Metabolism	1084	96-81-1
428			3-methyl-2-oxobutyrate	LC/MS neg	44526	C00141	HMDB0000019	49		1.31	1.18	0.97	0.9	0.74	0.82		0.0867717	0.131612	0.221457	0.579607	0.933868	0.87517	0.295962	0.233922	0.022497	0.0731643	0.100213	0.703731		0.8497	1.1161	1.0001	0.8245		100	100	100	100		Amino Acid	Leucine, Isoleucine and Valine Metabolism	100000936	3715-29-5
429			alpha-hydroxyisovalerate	LC/MS neg	33937		HMDB0000407	99823		0.96	0.9	0.96	0.94	1	1.07		0.905698	0.519406	0.66379	0.75443	0.879707	0.872229	0.627765	0.371657	0.956635	0.507757	0.436606	0.846183		1.2309	1.1792	1.1051	1.1802		100	100	100	100		Amino Acid	Leucine, Isoleucine and Valine Metabolism	100001300	600-37-3
431			isobutyrylcarnitine (C4)	LC/MS pos early	33441		HMDB0000736	168379		1.04	0.69	0.64	0.67	0.62	0.93		0.539343	0.412303	0.249073	0.592053	0.146273	0.641688	0.00185759	0.0274573	0.00550713	0.0449856	0.526946	0.884446		1.3868	1.4397	0.962	0.8928		100	100	100	100		Amino Acid	Leucine, Isoleucine and Valine Metabolism	100001055	25518-49-4
432			isobutyrylglycine	LC/MS neg	35437		HMDB0000730	10855600		0.35	3.65	1.35	10.49	3.88	0.37		0.0270636	0.0698536	0.401236	0.679643	0.309669	0.715569	0.0217815	0.0560408	0.00691725	0.04574	0.836927	0.94052		0.7703	0.268	2.812	1.0411		75	29	71	86		Amino Acid	Leucine, Isoleucine and Valine Metabolism	100001590	15926-18-8
433			3-hydroxyisobutyrate	LC/MS polar	1549	C01188 C06001	HMDB0000023 HMDB0000336	11966314		1.39	1.2	1.07	0.86	0.77	0.9		0.0440449	0.0899982	0.51138	0.720287	0.761736	0.854631	0.0858762	0.11527	0.00151089	0.0408052	0.240261	0.770853		0.882	1.2218	1.0559	0.946		100	100	100	100		Amino Acid	Leucine, Isoleucine and Valine Metabolism	111	2068-83-9
440		Methionine, Cysteine, SAM and Taurine Metabolism	methionine	LC/MS pos early	1302	C00073	HMDB0000696	6137		0.9	0.74	1.07	0.82	1.18	1.44		0.585135	0.427511	0.0963263	0.551308	0.929991	0.87517	0.0975612	0.122836	0.757069	0.454406	0.0726519	0.703731		1.1126	1.0013	0.8212	1.1855		100	100	100	100		Amino Acid	Methionine, Cysteine, SAM and Taurine Metabolism	415	63-68-3
441			N-acetylmethionine	LC/MS neg	1589	C02712	HMDB0011745	448580		0.89	0.8	1.14	0.9	1.29	1.44		0.611755	0.434369	0.254253	0.593264	0.529106	0.778204	0.146362	0.156448	0.197998	0.213527	0.0304379	0.672423		1.1451	1.0138	0.9121	1.3104		100	100	100	100		Amino Acid	Methionine, Cysteine, SAM and Taurine Metabolism	1083	65-82-7
443			N-formylmethionine	LC/MS neg	2829	C03145	HMDB0001015	439750		0.9	0.93	0.97	1.04	1.08	1.04		0.313168	0.300776	0.554064	0.726638	0.795756	0.860642	0.414878	0.285412	0.142924	0.172659	0.330188	0.81569		1.0367	0.9285	0.969	1.0064		100	100	100	100		Amino Acid	Methionine, Cysteine, SAM and Taurine Metabolism	194	4289-98-9
444			S-methylmethionine	LC/MS pos early	38127	C05319	HMDB0038670	458		0.4	1.71	1.69	4.3	4.25	0.99		0.0232509	0.0633561	0.516661	0.720287	0.709102	0.848782	0.0252848	0.0601398	0.0275809	0.0745199	0.728496	0.923804		0.7716	0.3069	1.3204	1.3044		58	14	71	86		Amino Acid	Methionine, Cysteine, SAM and Taurine Metabolism	100002183	3493-12-07
445			methionine sulfone	LC/MS pos early	44878		HMDB0062174	69961		0.53	0.96	1.19	1.82	2.24	1.23		0.0830876	0.129088	0.701607	0.768423	0.553321	0.782356	0.00844871	0.039465	0.0439824	0.0923572	0.637617	0.920108		1.4273	0.7551	1.3753	1.6947		100	100	100	100		Amino Acid	Methionine, Cysteine, SAM and Taurine Metabolism	100004635	820-10-0
446			methionine sulfoxide	LC/MS pos early	18374	C02989	HMDB0002005	158980		0.53	0.92	1.29	1.75	2.46	1.4		0.0060603	0.0304883	0.626264	0.743608	0.861784	0.868761	0.0588673	0.0932126	0.0600967	0.107533	0.328236	0.81569		1.4365	0.7558	1.3245	1.859		100	100	100	100		Amino Acid	Methionine, Cysteine, SAM and Taurine Metabolism	100000039	3226-65-1
447			N-acetylmethionine sulfoxide	LC/MS pos early	45428			11902949		0.75	0.84	1.39	1.12	1.86	1.66		0.304517	0.295693	0.735424	0.773858	0.261531	0.683017	0.24075	0.207104	0.0345818	0.0809848	0.0580074	0.703731		1.098	0.8219	0.9171	1.5252		75	43	71	86		Amino Acid	Methionine, Cysteine, SAM and Taurine Metabolism	100005463	108646-71-5
452			S-adenosylhomocysteine (SAH)	LC/MS neg	42382	C00021	HMDB0000939	439155		1.07	0.69	1.07	0.65	1	1.55		0.552812	0.418361	0.135595	0.551308	0.97589	0.882192	0.0211468	0.0556309	0.539637	0.379835	0.292221	0.795136		1.207	1.2886	0.8352	1.2926		100	100	86	71		Amino Acid	Methionine, Cysteine, SAM and Taurine Metabolism	197	979-92-0
453			5-methylthioribose**	LC/MS pos early	62100		HMDB0001087	6419710		0.64	0.79	0.76	1.24	1.18	0.95		0.0144373	0.0508422	0.301888	0.618792	0.200789	0.662551	0.154926	0.162625	0.357548	0.30098	0.565392	0.905152		1.3533	0.8647	1.0723	1.0228		100	100	100	100		Amino Acid	Methionine, Cysteine, SAM and Taurine Metabolism	100002103	23656-67-9
454			2,3-dihydroxy-5-methylthio-4-pentenoate (DMTPA)*	LC/MS neg	62805		HMDB0240388			0.59	0.71	0.72	1.21	1.23	1.01		0.00870417	0.0375725	0.113957	0.551308	0.132753	0.638125	0.0799257	0.110146	0.0687286	0.114976	0.730945	0.923804		1.4124	0.8304	1.004	1.0178		100	100	100	100		Amino Acid	Methionine, Cysteine, SAM and Taurine Metabolism	100020893
455			2-hydroxy-4-(methylthio)butanoic acid	LC/MS polar	63739		HMDB0037115	11427		0.31	0.6	0.88	1.94	2.82	1.45		0.00383597	0.0227209	0.193644	0.579607	0.481894	0.755964	0.193339	0.184308	0.0914912	0.132886	0.598071	0.920108		1.6837	0.5248	1.0186	1.4807		92	71	100	71		Amino Acid	Methionine, Cysteine, SAM and Taurine Metabolism	100021372	583-91-5
459			cystathionine	LC/MS pos early	15705	C02291	HMDB0000099	439258		1.35	1.08	0.95	0.8	0.7	0.88		0.24579	0.257611	0.711073	0.768423	0.674402	0.835004	0.183216	0.179043	0.0862045	0.128605	0.181936	0.734339		1.0068	1.3629	1.0868	0.96		100	100	100	100		Amino Acid	Methionine, Cysteine, SAM and Taurine Metabolism	310	535-34-2
460			alpha-ketobutyrate	LC/MS polar	4968	C00109	HMDB0000005	58		1.49	1.08	0.61	0.72	0.41	0.57		0.0525603	0.0974186	0.812085	0.78336	0.216722	0.666275	0.0714895	0.104312	0.0163818	0.0663066	0.0942025	0.703731		0.9402	1.4011	1.0123	0.5759		92	100	100	71		Amino Acid	Methionine, Cysteine, SAM and Taurine Metabolism	796	600-18-0
461			cysteine	LC/MS pos early	1868	C00097	HMDB0000574	5862		1.58	1.26	0.99	0.79	0.62	0.79		0.0155587	0.0527358	0.141168	0.551308	0.969966	0.882192	0.071274	0.104312	0.0304618	0.0771789	0.0357277	0.672423		0.9586	1.5175	1.2047	0.9462		100	100	100	100		Amino Acid	Methionine, Cysteine, SAM and Taurine Metabolism	800	52-90-4;56-89-3
463			S-methylcysteine	LC/MS polar	39592		HMDB0002108	88180;7058174;24417		1.47	1.2	1.05	0.81	0.71	0.88		0.00157881	0.0124476	0.228131	0.579607	0.663447	0.829943	0.0615614	0.0955354	0.0268215	0.0737224	0.359612	0.815898		0.8299	1.2218	0.9918	0.8714		83	100	86	100		Amino Acid	Methionine, Cysteine, SAM and Taurine Metabolism	100002749	1187-84-4
464			S-methylcysteine sulfoxide	LC/MS pos early	43378		HMDB0029432	82142		1.44	1.46	1.35	1.01	0.94	0.93		0.000805189	0.0100696	0.000425384	0.112165	0.0130363	0.491602	0.701222	0.394602	0.5005	0.363475	0.331267	0.81569		0.7716	1.109	1.1238	1.0406		100	100	100	100		Amino Acid	Methionine, Cysteine, SAM and Taurine Metabolism	100002927	6853-87-8
466			S-carboxyethylcysteine	LC/MS pos early	64177					0.52	0.9	1.09	1.75	2.11	1.21		0.060867	0.106464	0.754053	0.778124	0.418444	0.744374	0.0077207	0.0379625	0.00260099	0.0408052	0.414244	0.836554		1.3991	0.7216	1.2619	1.5251		100	100	100	100		Amino Acid	Methionine, Cysteine, SAM and Taurine Metabolism	100021530	4033-46-9
467			cysteine s-sulfate	LC/MS pos early	22176	C05824	HMDB0000731	115015		1.64	1.25	1.06	0.76	0.64	0.85		0.154443	0.195642	0.831615	0.785893	0.931841	0.87517	0.115705	0.135457	0.0484293	0.0965793	0.759526	0.925905		1.0374	1.7056	1.2927	1.0996		100	100	100	100		Amino Acid	Methionine, Cysteine, SAM and Taurine Metabolism	100000808	1637-71-4
468			cystine	LC/MS pos early	56	C00491	HMDB0000192	67678		1.16	0.78	0.78	0.67	0.68	1.01		0.238489	0.25303	0.327013	0.632531	0.346482	0.72078	0.00263704	0.0293285	0.0157542	0.0643676	0.916586	0.942048		1.1275	1.3082	0.8784	0.8848		100	100	86	86		Amino Acid	Methionine, Cysteine, SAM and Taurine Metabolism	279	56-89-3
472			lanthionine	LC/MS pos early	42002			98504		1.12	2.49	1.85	2.21	1.65	0.74		0.50584	0.397413	0.00573934	0.442297	0.101149	0.615598	0.00130196	0.0274573	0.00968313	0.0546767	0.0661349	0.703731		0.7837	0.8802	1.9496	1.4502		100	100	100	100		Amino Acid	Methionine, Cysteine, SAM and Taurine Metabolism	100003892	3183-08-02
474			cysteine sulfinic acid	LC/MS pos early	37443	C00606	HMDB0000996	109		1.79	1.56	1.61	0.87	0.9	1.03		0.00436002	0.0239909	0.00931407	0.461729	0.0110325	0.491602	0.30568	0.239174	0.593438	0.398585	0.859718	0.942048		0.8035	1.4359	1.2537	1.2921		100	100	100	100		Amino Acid	Methionine, Cysteine, SAM and Taurine Metabolism	100002113	207121-48-0
476			hypotaurine	LC/MS pos early	590	C00519	HMDB0000965	107812		1.72	0.99	1.01	0.57	0.59	1.03		0.0217234	0.0613409	0.908305	0.789259	0.731575	0.852079	0.00174037	0.0274573	0.00310735	0.0408052	0.754518	0.923804		1.0078	1.736	0.9948	1.0223		100	100	100	100		Amino Acid	Methionine, Cysteine, SAM and Taurine Metabolism	358	300-84-5
477			taurine	LC/MS pos early	2125	C00245	HMDB0000251	1123		1.12	0.83	1.27	0.74	1.14	1.53		0.184059	0.218247	0.313641	0.620283	0.239816	0.682672	0.0262629	0.0605338	0.709868	0.435051	0.0425465	0.672423		1.033	1.1526	0.8575	1.3133		100	100	100	100		Amino Acid	Methionine, Cysteine, SAM and Taurine Metabolism	512	107-35-7
479			N-acetyltaurine	LC/MS neg	48187		HMDB0240253	159864		0.96	0.81	1.03	0.84	1.07	1.28		0.644125	0.445354	0.411536	0.681048	0.813167	0.86653	0.0413619	0.0745973	0.937841	0.50114	0.141659	0.734339		1.0729	1.0347	0.8646	1.1036		100	100	100	100		Amino Acid	Methionine, Cysteine, SAM and Taurine Metabolism	100005466
482			succinoyltaurine	LC/MS polar	63678					0.5	0.6	0.54	1.2	1.07	0.89		0.430075	0.367014	0.757882	0.778124	0.459527	0.753573	0.469993	0.310523	0.96416	0.508432	0.512719	0.876655		2.1284	1.0684	1.2874	1.1462		100	100	100	100		Amino Acid	Methionine, Cysteine, SAM and Taurine Metabolism	100021220
487			3-sulfo-alanine	LC/MS polar	47089	C00506	HMDB0002757	72886		0.8	1.08	3.73	1.35	4.65	3.44		0.482318	0.387167	0.899918	0.789259	0.188274	0.652763	0.424224	0.288444	0.0625124	0.109542	0.146305	0.734339		1.0234	0.8206	1.11	3.8146		83	86	100	100		Amino Acid	Methionine, Cysteine, SAM and Taurine Metabolism	382	498-40-8
490		Urea cycle; Arginine and Proline Metabolism	arginine	LC/MS pos early	1638	C00062	HMDB0000517	6322		1.07	0.87	1.05	0.82	0.98	1.2		0.650358	0.447322	0.263537	0.595292	0.523831	0.778204	0.028094	0.0627899	0.987299	0.515501	0.080911	0.703731		0.9869	1.0556	0.861	1.0363		100	100	100	100		Amino Acid	Urea cycle; Arginine and Proline Metabolism	231	1119-34-2
491			argininosuccinate	LC/MS pos early	15497	C03406	HMDB0000052	60150382		1.75	1.1	1.22	0.63	0.7	1.11		0.0096972	0.0400189	0.783419	0.778124	0.406828	0.744374	0.0346057	0.069743	0.17319	0.196027	0.438218	0.84741		0.9139	1.5981	1.0045	1.1144		100	100	100	86		Amino Acid	Urea cycle; Arginine and Proline Metabolism	232	156637-58-0
492			urea	LC/MS pos early	1670	C00086	HMDB0000294	1176		0.56	0.78	0.82	1.39	1.45	1.04		0.00277555	0.0185196	0.30195	0.618792	0.43409	0.744947	0.0151213	0.0493941	0.0012619	0.0408052	0.609865	0.920108		1.3462	0.7605	1.0564	1.0999		100	100	100	100		Amino Acid	Urea cycle; Arginine and Proline Metabolism	533	57-13-6
494			ornithine	LC/MS pos early	1493	C00077	HMDB0000214	6262		1.67	0.77	1.02	0.46	0.61	1.33		0.268083	0.272436	0.404787	0.680312	0.850748	0.868761	0.0614352	0.0955354	0.383286	0.312694	0.269964	0.78716		1.0601	1.7654	0.8162	1.0838		100	100	100	100		Amino Acid	Urea cycle; Arginine and Proline Metabolism	444	3184-13-2
496			3-amino-2-piperidone	LC/MS pos early	62853		HMDB0000323	5200225		0.37	0.89	1.49	2.41	4.06	1.69		0.0239848	0.064313	0.902753	0.789259	0.421766	0.744374	0.0180535	0.0532048	0.0078277	0.0469288	0.506607	0.872892		1.6296	0.6002	1.4453	2.4359		100	100	100	100		Amino Acid	Urea cycle; Arginine and Proline Metabolism	100020361	1892-22-4
498			2-oxoarginine*	LC/MS pos early	55072	C03771	HMDB0004225	558		0.79	1.32	1.18	1.67	1.5	0.9		0.378303	0.335855	0.70687	0.768423	0.759545	0.854631	0.0674649	0.101356	0.153285	0.179331	0.758915	0.925905		1.1205	0.8859	1.4757	1.3266		100	100	100	100		Amino Acid	Urea cycle; Arginine and Proline Metabolism	100002784	3715-10-04
499			citrulline	LC/MS pos early	2132	C00327	HMDB0000904	9750		1.08	1.01	1.09	0.93	1	1.08		0.437933	0.370725	0.961674	0.798344	0.542719	0.778204	0.222629	0.19922	0.948632	0.504501	0.600108	0.920108		0.9364	1.0142	0.9457	1.0171		100	100	100	100		Amino Acid	Urea cycle; Arginine and Proline Metabolism	391	372-75-8
500			homoarginine	LC/MS polar	22137	C01924	HMDB0000670	9085		1.13	1.38	1.44	1.22	1.27	1.05		0.768222	0.477416	0.21423	0.579607	0.153326	0.648226	0.17687	0.1743	0.305148	0.278314	0.907236	0.942048		1.4722	1.669	2.0292	2.1257		100	100	100	100		Amino Acid	Urea cycle; Arginine and Proline Metabolism	100000961	156-86-5
501			homocitrulline	LC/MS pos early	22138	C02427	HMDB0000679	65072		0.49	0.75	0.83	1.52	1.69	1.11		0.24729	0.258157	0.774121	0.778124	0.89114	0.875161	0.122021	0.138344	0.0990996	0.137956	0.508641	0.872892		1.6796	0.8287	1.2622	1.3971		100	100	100	100		Amino Acid	Urea cycle; Arginine and Proline Metabolism	100000963	1190-49-4
502			proline	LC/MS pos early	1898	C00148 C000763	HMDB0000162 HMDB0003411	145742;614;8988		0.62	0.72	0.96	1.16	1.54	1.33		0.00627542	0.0309805	0.0787862	0.551308	0.957774	0.880562	0.0959743	0.121493	0.0172824	0.0663066	0.0213958	0.672423		1.3423	0.8327	0.9677	1.2839		100	100	100	100		Amino Acid	Urea cycle; Arginine and Proline Metabolism	480	147-85-3
505			dimethylarginine (SDMA + ADMA)	LC/MS pos early	36808	C21189 C03626	HMDB0003334 HMDB0001539	123831;169148		0.91	0.84	0.88	0.92	0.97	1.05		0.506047	0.397413	0.172615	0.579607	0.373291	0.736869	0.280773	0.228489	0.516294	0.37066	0.529508	0.884446		1.1105	1.014	0.9366	0.9823		100	100	100	100		Amino Acid	Urea cycle; Arginine and Proline Metabolism	100001810	102783-24-4
506			N-acetylarginine	LC/MS pos early	33953	C02562	HMDB0004620	67427		0.92	0.81	0.96	0.88	1.04	1.19		0.828892	0.494189	0.349485	0.646062	0.840547	0.868761	0.197304	0.184831	0.649158	0.415054	0.119025	0.711613		1.1671	1.0754	0.9427	1.1172		100	100	100	100		Amino Acid	Urea cycle; Arginine and Proline Metabolism	100001266	155-84-0
508			carboxymethylarginine	LC/MS pos early	64071		HMDB39111			0.98	1.61	1.35	1.64	1.37	0.84		0.895946	0.517192	0.211247	0.579607	0.25186	0.682672	0.250446	0.211932	0.432359	0.333576	0.808821	0.935671		0.8757	0.8621	1.4134	1.1842		92	86	100	86		Amino Acid	Urea cycle; Arginine and Proline Metabolism	100021052	18416-86-9
515			N-delta-acetylornithine	LC/MS neg	43249	C00437	HMDB0003357	9920500		0.43	0.9	0.71	2.07	1.63	0.79		0.00328075	0.0201514	0.658505	0.751486	0.243912	0.682672	0.0129992	0.0464947	0.0115331	0.0568227	0.515168	0.876851		1.4331	0.6214	1.2865	1.0153		100	100	100	100		Amino Acid	Urea cycle; Arginine and Proline Metabolism	100004523
520			trans-4-hydroxyproline	LC/MS pos early	32306	C01157	HMDB0000725	5810		0.76	1.43	1.48	1.89	1.96	1.04		0.60542	0.432754	0.0237424	0.519117	0.162262	0.648226	0.000122328	0.0159526	0.0238373	0.0732182	0.668261	0.920108		0.9707	0.7329	1.3845	1.4357		100	100	100	100		Amino Acid	Urea cycle; Arginine and Proline Metabolism	1001	51-35-4
522			pro-hydroxy-pro	LC/MS pos early	35127		HMDB0006695	11902893		0.68	0.66	0.47	0.97	0.69	0.71		0.160058	0.200793	0.189505	0.579607	0.0161705	0.491602	0.574164	0.348391	0.896077	0.488417	0.0176417	0.672423		1.8773	1.28	1.2362	0.8827		100	100	100	100		Amino Acid	Urea cycle; Arginine and Proline Metabolism	100001167	18684-24-7
525			N-methylproline	LC/MS pos early	37431		HMDB0094696	643474		0.97	1.86	1.86	1.92	1.92	1		0.879208	0.513375	0.0590516	0.551308	0.0855546	0.577955	0.00158607	0.0274573	0.00414713	0.0408052	0.940018	0.94919		0.9859	0.9572	1.8362	1.8345		100	100	100	100		Amino Acid	Urea cycle; Arginine and Proline Metabolism	100001956	475-11-6
526			N,N,N-trimethyl-alanylproline betaine (TMAP)	LC/MS pos early	62947		HMDB0240365			0.55	0.34	0.32	0.63	0.58	0.93		0.151606	0.193439	0.00857366	0.461729	0.00363633	0.491602	0.0923246	0.120128	0.0253451	0.0735823	0.84285	0.94052		2.2806	1.2502	0.7861	0.7291		100	100	100	100		Amino Acid	Urea cycle; Arginine and Proline Metabolism	100020217
529			argininate*	LC/MS pos early	57461		HMDB0003148	160437		0.48	0.87	0.82	1.8	1.71	0.95		0.0154487	0.0527358	0.452667	0.69994	0.462598	0.75574	0.139961	0.152632	0.0726839	0.117988	0.748637	0.923804		1.4013	0.6746	1.2126	1.1534		100	100	100	100		Amino Acid	Urea cycle; Arginine and Proline Metabolism	100002769	157-07-3
535		Creatine Metabolism	guanidinoacetate	LC/MS pos early	43802	C00581	HMDB0000128	763		0.69	1.17	1.63	1.71	2.38	1.39		0.165735	0.206479	0.613547	0.742984	0.277852	0.690904	0.0279463	0.0627601	0.0131619	0.0612449	0.395818	0.825559		1.2049	0.8263	1.4138	1.9696		100	100	100	100		Amino Acid	Creatine Metabolism	344	352-97-6
536			creatine	LC/MS pos early	27718	C00300	HMDB0000064	586		1.15	0.63	1.8	0.55	1.57	2.85		0.0497632	0.0948981	0.661682	0.753116	0.247061	0.682672	0.0144806	0.0490152	0.769653	0.458106	0.247363	0.782573		1.5335	1.762	0.9697	2.7635		100	100	100	100		Amino Acid	Creatine Metabolism	1221	57-00-1
537			creatinine	LC/MS pos early	513	C00791	HMDB0000562	588		0.64	0.94	1.02	1.46	1.59	1.09		0.00065839	0.00898899	0.694661	0.767697	0.811656	0.86653	0.00391844	0.0358894	0.00164816	0.0408052	0.212371	0.743264		1.1939	0.7698	1.1239	1.2222		100	100	100	100		Amino Acid	Creatine Metabolism	275	60-27-5
538			creatine phosphate	LC/MS polar	33951	C02305	HMDB0001511	587;9548602		0.2	0.62	0.6	3.08	3	0.97		8.70527e-07	0.000229922	0.0893049	0.551308	0.0512619	0.577955	0.0248481	0.0601398	0.000966113	0.0408052	0.700961	0.920108		1.3776	0.2758	0.8494	0.8263		100	57	71	100		Amino Acid	Creatine Metabolism	100000112	67-07-2;922-32-7
545		Polyamine Metabolism	putrescine	LC/MS pos early	1408	C00134	HMDB0001414	1045		1.05	1.06	1.14	1.01	1.08	1.07		0.877423	0.513375	0.987512	0.808654	0.650965	0.823687	0.820844	0.42937	0.717532	0.438145	0.516319	0.876851		0.9897	1.039	1.0507	1.1249		100	100	100	100		Amino Acid	Polyamine Metabolism	49	110-60-1
546			N-acetylputrescine	LC/MS pos early	37496	C02714	HMDB0002064	122356		0.81	0.98	1	1.21	1.24	1.02		0.180906	0.217679	0.994021	0.809126	0.920598	0.87517	0.1789	0.175918	0.291782	0.272624	0.854375	0.942048		1.0499	0.8489	1.0272	1.0486		100	100	100	100		Amino Acid	Polyamine Metabolism	192	18233-70-0
550			N-carbamoylputrescine	LC/MS pos early	63854	C00436	HMDB0033458	502		1.59	1.01	0.57	0.64	0.36	0.57		0.483008	0.387167	0.928362	0.791347	0.307437	0.712315	0.0747628	0.107009	0.052219	0.100162	0.165063	0.734339		1.8335	2.9076	1.8464	1.0493		100	100	100	86		Amino Acid	Polyamine Metabolism	100021503
552			N-acetyl-isoputreanine	LC/MS pos early	62309			131802901		0.45	0.55	0.53	1.2	1.17	0.97		0.0753786	0.121274	0.274285	0.596776	0.22566	0.677152	0.0268451	0.061469	0.0176801	0.0663066	0.595087	0.920108		1.9549	0.8862	1.0665	1.0356		100	100	100	100		Amino Acid	Polyamine Metabolism	100020487
553			spermidine	LC/MS pos early	485	C00315	HMDB0001257	1102		1.44	1.33	1.65	0.92	1.15	1.24		0.269484	0.272704	0.360665	0.658891	0.0123467	0.491602	0.762835	0.413856	0.162948	0.186536	0.175391	0.734339		0.833	1.198	1.1076	1.3735		100	100	100	100		Amino Acid	Polyamine Metabolism	50	124-20-9
558			(N(1) + N(8))-acetylspermidine	LC/MS pos early	57814	C00612 C01029	HMDB0001276 HMDB0002189	123689;496		1.1	1.12	1.19	1.01	1.08	1.07		0.961716	0.532323	0.936925	0.793437	0.814599	0.866987	0.884601	0.450119	0.834335	0.478819	0.0699622	0.703731		1.0996	1.2131	1.2275	1.3092		100	100	100	100		Amino Acid	Polyamine Metabolism	100016038
564			5-methylthioadenosine (MTA)	LC/MS pos early	1419	C00170	HMDB0001173	439176		1.23	0.85	0.67	0.69	0.54	0.79		0.0858088	0.130799	0.483689	0.716481	0.0750989	0.577955	0.0646868	0.0981041	0.0168817	0.0663066	0.00659801	0.672423		1.0951	1.3524	0.9297	0.7333		100	100	100	100		Amino Acid	Polyamine Metabolism	212	2457-80-9
568			4-acetamidobutanoate	LC/MS pos early	1558	C02946	HMDB0003681	18189		0.52	0.64	0.69	1.22	1.32	1.08		0.0166204	0.0535337	0.0924305	0.551308	0.18527	0.652763	0.216409	0.195906	0.144516	0.173747	0.178161	0.734339		1.3589	0.712	0.8683	0.9415		100	100	100	100		Amino Acid	Polyamine Metabolism	1113	3025-96-5
570		Guanidino and Acetamido Metabolism	1-methylguanidine	LC/MS pos early	48114	C02294	HMDB0001522	10111		0.22	0.96	0.95	4.41	4.37	0.99		0.000895382	0.0100696	0.914508	0.789259	0.928927	0.87517	0.00322897	0.032789	0.0060227	0.0449856	0.987631	0.953784		1.5545	0.3393	1.4977	1.4835		100	100	100	100		Amino Acid	Guanidino and Acetamido Metabolism	100000715	22661-87-6
571			4-guanidinobutanoate	LC/MS pos early	15681	C01035	HMDB0003464	500		0.34	0.51	0.78	1.49	2.27	1.53		0.0477986	0.0931792	0.275714	0.596776	0.921682	0.87517	0.158938	0.163109	0.0206293	0.0720218	0.0352623	0.672423		2.0721	0.7122	1.0578	1.615		100	86	100	100		Amino Acid	Guanidino and Acetamido Metabolism	100000096	463-003;463-00-3
572			guanidinosuccinate	LC/MS polar	32446	C03139	HMDB0003157	439918		0.17	0.33	0.34	1.89	1.92	1.01		0.0538601	0.0980026	0.545049	0.726638	0.565342	0.791865	0.0122318	0.0464461	0.012302	0.0594456	0.776488	0.931556		4.5013	0.7871	1.4894	1.5102		100	100	100	100		Amino Acid	Guanidino and Acetamido Metabolism	100001212	6133-30-8
575		Glutathione Metabolism	glutathione, oxidized (GSSG)	LC/MS pos early	27727	D00031 C00127	HMDB0003337	65359		0.82	0.84	0.96	1.03	1.17	1.14		0.772876	0.47827	0.443498	0.694802	0.507753	0.767152	0.467801	0.310093	0.541923	0.379835	0.931569	0.94919		1.4899	1.2226	1.2555	1.4347		100	100	100	71		Amino Acid	Glutathione Metabolism	448	103239-24-3
581			cysteine-glutathione disulfide	LC/MS pos early	35159	R00900	HMDB0000656	3080690		0.92	0.72	0.82	0.79	0.89	1.13		0.991862	0.540896	0.225095	0.579607	0.405572	0.744374	0.167028	0.168492	0.374463	0.309689	0.807018	0.935671		1.3232	1.212	0.9587	1.0799		100	100	100	100		Amino Acid	Glutathione Metabolism	100001437	13081-14-6
582			S-methylglutathione	LC/MS neg	33944	C11347		115260		0.88	1.04	1	1.17	1.14	0.97		0.398366	0.347625	0.883114	0.786109	0.839377	0.868761	0.225406	0.199413	0.57872	0.391959	0.611095	0.920108		0.922	0.8134	0.9556	0.9234		92	86	71	57		Amino Acid	Glutathione Metabolism	100001259	2922-56-7
584			cysteinylglycine	LC/MS pos early	35637	C01419	HMDB0000078	439498		1.63	0.8	0.64	0.49	0.39	0.8		0.564222	0.422203	0.586508	0.735252	0.179395	0.648226	0.288941	0.231904	0.222322	0.229891	0.376383	0.819254		0.9826	1.6007	0.7827	0.6241		75	71	43	14		Amino Acid	Glutathione Metabolism	278	19246-18-5
585			cysteinylglycine disulfide*	LC/MS pos early	62103		HMDB0000709	22833544		1.22	0.89	0.81	0.73	0.67	0.91		0.396701	0.347333	0.792841	0.778124	0.435083	0.744947	0.197448	0.184831	0.115384	0.148094	0.282337	0.795136		1.1173	1.3639	0.9976	0.9081		100	100	100	100		Amino Acid	Glutathione Metabolism	100002466	70555-24-7
587			5-oxoproline	LC/MS neg	1494	C01879 C02237	HMDB0000267	439685;7405		0.94	0.85	1.13	0.9	1.2	1.34		0.816832	0.490877	0.258505	0.595292	0.51838	0.774738	0.255883	0.214975	0.413823	0.32576	0.00468404	0.672423		1.1143	1.052	0.9419	1.2615		100	100	100	100		Amino Acid	Glutathione Metabolism	1021	98-79-3
588			2-aminobutyrate	LC/MS pos early	42374	C02356	HMDB0000452	80283		1.1	0.81	0.84	0.74	0.76	1.03		0.457899	0.379014	0.267629	0.595292	0.347235	0.72078	0.00729458	0.0378015	0.029872	0.0769851	0.823953	0.936955		1.1411	1.2548	0.9268	0.9558		100	100	100	100		Amino Acid	Glutathione Metabolism	1128	1492-24-6
590			2-hydroxybutyrate/2-hydroxyisobutyrate	LC/MS polar	52281	C21297 C05984	HMDB0000729 HMDB00008	4277439;440864		0.73	0.91	0.72	1.25	0.99	0.79		0.618801	0.437332	0.733995	0.773858	0.479523	0.755964	0.914624	0.457913	0.292393	0.272624	0.335519	0.81569		1.4262	1.0374	1.3019	1.0222		100	100	100	100		Amino Acid	Glutathione Metabolism	100008928
592			ophthalmate	LC/MS neg	34592		HMDB0005765	7018721		0.69	0.58	0.72	0.84	1.05	1.25		0.406596	0.352097	0.190618	0.579607	0.401253	0.744374	0.642327	0.374114	0.961382	0.508034	0.704554	0.920108		0.947	0.6497	0.5488	0.6845		67	71	43	57		Amino Acid	Glutathione Metabolism	100001311	495-27-2
603		Felinine Metabolism	felinine	LC/MS neg	33468			534472;164607		0.92	1.25	1.19	1.35	1.29	0.95		0.7996	0.484935	0.518962	0.720287	0.573508	0.794827	0.386301	0.275159	0.356586	0.300778	0.88968	0.942048		1.1626	1.0753	1.4523	1.3864		100	100	100	100		Amino Acid	Felinine Metabolism	100001312	471-09-0
604			gamma-glutamylfelinylglycine*	LC/MS pos early	33466			87632550		0.56	0.97	0.77	1.72	1.37	0.8		0.0413285	0.0875586	0.951816	0.798344	0.273056	0.68599	0.0135369	0.0464947	0.118486	0.150746	0.230865	0.756157		1.2897	0.7244	1.2459	0.9927		100	100	100	100		Amino Acid	Felinine Metabolism	100001319
605			N-acetylfelinine*	LC/MS neg	41880			134820350		0.44	0.75	0.62	1.69	1.4	0.83		0.0552913	0.0996824	0.650548	0.750909	0.337527	0.72078	0.0375515	0.0730866	0.0531062	0.100711	0.11421	0.711613		2.0219	0.8945	1.5153	1.2544		100	100	100	100		Amino Acid	Felinine Metabolism	100004038
642		Lactoyl Amino Acid	N-lactoyl leucine	LC/MS neg	64880					1.31	0.92	1.34	0.71	1.03	1.45		0.0971742	0.142977	0.652263	0.750909	0.207343	0.662551	0.0434857	0.0768145	0.957404	0.507757	0.145396	0.734339		0.9991	1.3067	0.9233	1.3431		100	100	100	100		Amino Acid	Lactoyl Amino Acid	100022480	210769-82-7
644			N-lactoyl phenylalanine	LC/MS neg	64881					1.11	0.85	1.11	0.77	1	1.31		0.679508	0.454964	0.435197	0.689895	0.275647	0.688497	0.263873	0.220105	0.702193	0.433832	0.124321	0.722722		1.0766	1.1907	0.9126	1.1947		100	100	100	100		Amino Acid	Lactoyl Amino Acid	100022482	183241-73-8
646			N-lactoyl valine	LC/MS neg	64883					1.61	1.32	1.81	0.82	1.13	1.38		0.0401339	0.0862657	0.211025	0.579607	0.018825	0.491602	0.283847	0.229962	0.432484	0.333576	0.110404	0.703731		0.6792	1.0904	0.8946	1.2303		75	100	100	100		Amino Acid	Lactoyl Amino Acid	100022485	21753-44-6
648	Peptide	Gamma-glutamyl Amino Acid	gamma-glutamylalanine	LC/MS pos early	37063	C03738	HMDB0029142	440103		0.94	0.87	0.75	0.92	0.8	0.87		0.859871	0.506938	0.403341	0.680294	0.172134	0.648226	0.399631	0.279033	0.189064	0.205657	0.322374	0.81569		1.1002	1.0371	0.9586	0.8305		100	100	100	100		Peptide	Gamma-glutamyl Amino Acid	100001843	5875-41-2
650			gamma-glutamylglutamate	LC/MS pos early	36738	C05282	HMDB0011737	92865		1.62	0.89	1.27	0.55	0.79	1.43		0.00131843	0.0114171	0.525936	0.7248	0.421519	0.744374	0.00141199	0.0274573	0.115341	0.148094	0.0338881	0.672423		0.9186	1.4871	0.8177	1.1689		100	100	100	100		Peptide	Gamma-glutamyl Amino Acid	331	1116-22-9
651			gamma-glutamylglutamine	LC/MS pos early	2730	C05283	HMDB0011738	150914		0.88	0.77	0.78	0.87	0.88	1		0.391851	0.34441	0.0298671	0.519117	0.0319929	0.564264	0.420046	0.287275	0.418662	0.327212	0.913196	0.942048		1.2109	1.0702	0.9354	0.9393		100	100	100	100		Peptide	Gamma-glutamyl Amino Acid	1140	10148-81-9
652			gamma-glutamylglycine	LC/MS pos early	33949		HMDB0011667	100099		0.63	0.78	0.77	1.24	1.22	0.98		0.0232735	0.0633561	0.182202	0.579607	0.171912	0.648226	0.0628735	0.0965214	0.245789	0.245567	0.754824	0.923804		1.2999	0.8184	1.0138	0.9982		100	100	100	100		Peptide	Gamma-glutamyl Amino Acid	100001294	1948-29-4
653			gamma-glutamylhistidine	LC/MS pos early	18245		HMDB0029151	7017195		0.87	0.77	0.97	0.89	1.12	1.27		0.488109	0.389609	0.129046	0.551308	0.799674	0.860642	0.239162	0.206642	0.572354	0.389222	0.189783	0.735893		1.2394	1.075	0.9521	1.206		100	100	100	100		Peptide	Gamma-glutamyl Amino Acid	1235	37460-15-4
654			gamma-glutamylisoleucine*	LC/MS pos early	34456		HMDB0011170	22885096		0.94	0.79	0.82	0.84	0.87	1.04		0.961702	0.532323	0.274892	0.596776	0.400929	0.744374	0.205869	0.189781	0.270005	0.262457	0.59601	0.920108		1.1888	1.1232	0.9386	0.9759		100	100	100	100		Peptide	Gamma-glutamyl Amino Acid	100001485
655			gamma-glutamylleucine	LC/MS pos early	18369		HMDB0011171	151023		0.9	0.81	0.82	0.9	0.91	1.02		0.646045	0.445516	0.233285	0.579607	0.284719	0.695086	0.419968	0.287275	0.432873	0.333576	0.828986	0.938045		1.1976	1.0785	0.967	0.9849		100	100	100	100		Peptide	Gamma-glutamyl Amino Acid	1268	2566-39-4
657			gamma-glutamyl-epsilon-lysine	LC/MS pos early	33934		HMDB0003869	7015685		0.83	0.92	1.08	1.11	1.31	1.18		0.257163	0.266079	0.407457	0.680312	0.84438	0.868761	0.715054	0.39955	0.541658	0.379835	0.367684	0.819254		1.1037	0.9131	1.0104	1.196		100	100	100	100		Peptide	Gamma-glutamyl Amino Acid	100001262	17105-15-6
658			gamma-glutamylmethionine	LC/MS pos early	44872		HMDB0029155	7009567		0.89	0.72	0.88	0.8	0.98	1.22		0.661247	0.450123	0.120624	0.551308	0.482418	0.755964	0.195073	0.184461	0.669437	0.420529	0.394689	0.825559		1.2309	1.0996	0.8851	1.0815		100	100	100	100		Peptide	Gamma-glutamyl Amino Acid	100001313	17663-87-5
659			gamma-glutamylphenylalanine	LC/MS pos early	33422		HMDB0000594	111299		1.22	0.81	0.9	0.67	0.74	1.1		0.123357	0.165385	0.144271	0.551308	0.440122	0.74548	0.014263	0.0486308	0.00156409	0.0408052	0.253621	0.782573		1.0645	1.2943	0.8646	0.9545		100	100	100	100		Peptide	Gamma-glutamyl Amino Acid	100000491	7432-24-8
660			gamma-glutamylthreonine	LC/MS pos early	33364		HMDB0029159	76078708		0.87	0.81	0.9	0.93	1.03	1.11		0.306665	0.296688	0.0895615	0.551308	0.448263	0.748843	0.455907	0.303795	0.883817	0.486284	0.323199	0.81569		1.1691	1.0141	0.9481	1.0489		100	100	100	100		Peptide	Gamma-glutamyl Amino Acid	100001314	5652-48-2
661			gamma-glutamyltryptophan	LC/MS pos early	33947		HMDB0029160	3989307		1.11	0.92	0.79	0.83	0.72	0.86		0.446589	0.374609	0.669519	0.754438	0.236834	0.682672	0.176776	0.1743	0.0247259	0.0732182	0.159694	0.734339		1.1572	1.281	1.0653	0.9165		100	100	86	100		Peptide	Gamma-glutamyl Amino Acid	100001295	66471-20-3
662			gamma-glutamyltyrosine	LC/MS pos early	2734		HMDB0011741	94340		1.28	0.73	0.82	0.57	0.64	1.12		0.115813	0.158489	0.0940049	0.551308	0.317372	0.72078	0.00111744	0.0274573	0.00300993	0.0408052	0.0594315	0.703731		1.1583	1.485	0.8509	0.9515		100	100	100	100		Peptide	Gamma-glutamyl Amino Acid	1102	7432-23-7
663			gamma-glutamylvaline	LC/MS pos early	43829		HMDB0011172	7015683		0.96	0.9	0.89	0.93	0.92	0.99		0.924863	0.52532	0.702007	0.768423	0.639456	0.818713	0.460387	0.306343	0.363493	0.304962	0.797819	0.935671		1.1118	1.068	0.9956	0.9869		100	100	100	100		Peptide	Gamma-glutamyl Amino Acid	100001126	2746-34-1
664			gamma-glutamylserine	LC/MS pos early	54914		HMDB0029158	22844748		0.9	0.8	0.76	0.89	0.84	0.94		0.482153	0.387167	0.129733	0.551308	0.0193405	0.491602	0.373135	0.268976	0.267337	0.260872	0.780071	0.931556		1.2001	1.0836	0.965	0.9109		100	100	100	100		Peptide	Gamma-glutamyl Amino Acid	100009231	5875-35-4
665			gamma-glutamylcitrulline*	LC/MS pos early	62104					1.07	0.96	0.82	0.9	0.77	0.85		0.756975	0.475222	0.732066	0.773858	0.319723	0.72078	0.418786	0.287255	0.1118	0.145556	0.456163	0.857653		1.0546	1.1289	1.0111	0.8643		100	100	100	100		Peptide	Gamma-glutamyl Amino Acid	100020241
666			gamma-glutamyl-2-aminobutyrate	LC/MS pos early	37092					0.93	0.8	0.72	0.86	0.77	0.9		0.737994	0.470152	0.616607	0.742984	0.427809	0.744374	0.351986	0.262644	0.0325903	0.0795055	0.826397	0.938045		1.2032	1.1204	0.9606	0.8655		92	100	86	100		Peptide	Gamma-glutamyl Amino Acid	100001502	16869-42-4
761		Dipeptide	cyclo(gly-pro)	LC/MS pos early	37077			193540		0.23	1.5	1.9	6.67	8.42	1.26		0.0449948	0.0899982	0.124682	0.551308	0.272679	0.68599	0.00055844	0.0217456	0.00367761	0.0408052	0.939943	0.94919		1.5429	0.348	2.3218	2.9317		100	100	100	100		Peptide	Dipeptide	100001946	3705-27-9
778			cyclo(leu-pro)	LC/MS pos early	37104		HMDB0034276	7074739		0.24	0.71	1.21	2.92	4.97	1.7		0.00673469	0.0320497	0.268659	0.595292	0.851634	0.868761	0.129302	0.145539	0.00198102	0.0408052	0.0700674	0.703731		1.51	0.3682	1.075	1.8289		92	43	86	86		Peptide	Dipeptide	100001925	2873-36-1
782			cyclo(met-pro)	LC/MS pos early	52350			6502027		0.82	1.51	1.25	1.85	1.53	0.83		0.475469	0.385511	0.385268	0.67121	0.115888	0.638125	0.156112	0.162772	0.0292145	0.0765436	0.893064	0.942048		1.0922	0.8908	1.6458	1.3618		100	100	100	100		Peptide	Dipeptide	100006759	1355217-56-9
798			cyclo(pro-sulfo-tyr)*	LC/MS neg	62840					0.2	1.08	1.19	5.36	5.9	1.1		0.00358832	0.0216288	0.88693	0.786543	0.584542	0.799325	0.0191896	0.0540092	0.00194761	0.0408052	0.675196	0.920108		1.5925	0.322	1.7275	1.9003		92	43	100	86		Peptide	Dipeptide	100020992
806			felinylglycine*	LC/MS pos early	41879			87631897		0.56	0.98	0.65	1.76	1.16	0.66		0.143741	0.185194	0.538432	0.726638	0.319365	0.72078	0.0101058	0.0425275	0.306026	0.278609	0.0688205	0.703731		1.4497	0.8072	1.4196	0.9375		100	100	100	100		Peptide	Dipeptide	100004037
835			glycylleucine	LC/MS pos early	34398	C02155	HMDB0000759	92843		0.76	0.63	1.15	0.83	1.53	1.85		0.656776	0.449602	0.260144	0.595292	0.579087	0.79483	0.360882	0.26422	0.092934	0.133821	0.0913835	0.703731		1.1787	0.8906	0.7371	1.361		75	71	43	71		Peptide	Dipeptide	100001258	869-19-2
845			glycylvaline	LC/MS pos early	18357		HMDB0028854	2724807		4.25	0.97	1.99	0.23	0.47	2.05		0.0198978	0.0579392	0.971385	0.800846	0.031412	0.564264	0.053065	0.0878985	0.63009	0.412305	0.0377979	0.672423		0.9357	3.9793	0.9066	1.8627		67	100	57	100		Peptide	Dipeptide	100000487	1963-21-9
963			prolylglycine	LC/MS pos early	40703		HMDB0011178	6426709		0.7	0.63	0.67	0.89	0.95	1.06		0.219742	0.241825	0.162341	0.579607	0.259131	0.682672	0.891047	0.452366	0.847262	0.481662	0.684673	0.920108		1.0351	0.7283	0.6515	0.6902		92	57	71	71		Peptide	Dipeptide	100003674	2578-57-6
1153		Polypeptide	glu-gly-asn-val**	LC/MS pos early	62917					2.65	1.19	2	0.45	0.75	1.69		0.00782732	0.0353392	0.563546	0.726638	0.0188712	0.491602	0.0679702	0.101437	0.638339	0.414093	0.0353504	0.672423		0.8614	2.2859	1.0211	1.7249		100	100	100	100		Peptide	Polypeptide	100021107
1199		Acetylated Peptides	phenylacetylalanine	LC/MS neg	57645			564251		1.82	0.94	1.03	0.51	0.56	1.1		0.479096	0.386967	0.868448	0.785893	0.972595	0.882192	0.157061	0.163082	0.326762	0.289379	0.872415	0.942048		1.238	2.2566	1.1589	1.2739		92	86	100	100		Peptide	Acetylated Peptides	100009240	17966-65-3
1201			phenylacetylcarnitine	LC/MS pos early	48425			101724840		3.58	1.7	1.53	0.47	0.43	0.9		0.17529	0.213829	0.45735	0.702488	0.933505	0.87517	0.0469539	0.0806352	0.0647955	0.1119	0.17643	0.734339		0.4653	1.6667	0.7897	0.7104		58	71	71	57		Peptide	Acetylated Peptides	100006108	287108-21-8
1203			phenylacetylglutamate	LC/MS neg	52925		HMDB0059772	11579826		0.9	0.68	0.72	0.76	0.8	1.06		0.928539	0.52532	0.897921	0.789259	0.538423	0.778204	0.552354	0.342191	0.351346	0.299534	0.394397	0.825559		1.4824	1.334	1.0097	1.0688		83	86	100	100		Peptide	Acetylated Peptides	100009045
1204			phenylacetylglutamine	LC/MS neg	35126	C04148	HMDB0006344	92258		0.98	1.18	1.09	1.21	1.11	0.92		0.79934	0.484935	0.798748	0.780057	0.896997	0.87517	0.934389	0.464325	0.565288	0.386508	0.532461	0.88598		1.286	1.2612	1.5232	1.3964		83	100	86	86		Peptide	Acetylated Peptides	100001417	28047-15-6
1207			phenylacetylglycine	LC/MS pos early	33945	C05598	HMDB0000821	68144		0.94	1.59	1.27	1.69	1.35	0.8		0.67348	0.453194	0.181459	0.579607	0.428891	0.744374	0.0160587	0.0513142	0.451969	0.341973	0.101383	0.703731		1.2114	1.1398	1.9255	1.5353		100	100	100	100		Peptide	Acetylated Peptides	100001275	500-98-1
1208			4-hydroxyphenylacetylglycine	LC/MS neg	43525	C05596	HMDB0000735	440732		0.2	0.54	0.44	2.73	2.24	0.82		0.0031072	0.0195397	0.480427	0.716434	0.280689	0.691308	0.0208647	0.0555515	0.0142935	0.0624623	0.739032	0.923804		2.6147	0.5136	1.4019	1.1486		100	100	100	100		Peptide	Acetylated Peptides	100004418	28116-23-6
1213			phenylacetylserine	LC/MS neg	54911					1.27	1.34	1.4	1.05	1.1	1.05		0.669448	0.451055	0.573586	0.730901	0.621573	0.81022	0.708541	0.396846	0.922522	0.497971	0.878606	0.942048		0.9095	1.1556	1.2157	1.276		92	100	100	100		Peptide	Acetylated Peptides	100010900
1214			phenylacetyltaurine	LC/MS neg	63154			2179693		1.29	1.42	1.34	1.1	1.04	0.95		0.701798	0.460467	0.530572	0.726638	0.787709	0.860385	0.435135	0.2933	0.869105	0.485021	0.475096	0.866632		1.0443	1.3469	1.4784	1.4032		100	100	100	100		Peptide	Acetylated Peptides	100008932	33953-90-1
1219		Modified Peptides	pyroglutamylalanine*	LC/MS neg	62087			159907		0.9	0.62	0.91	0.69	1.01	1.47		0.762951	0.47582	0.117482	0.551308	0.755263	0.854631	0.00526364	0.03673	0.973371	0.512214	0.0539922	0.703731		1.386	1.2511	0.8628	1.266		100	100	100	100		Peptide	Modified Peptides	100020227
1235			pyroglutamylvaline	LC/MS neg	32394			152416		0.5	0.64	0.78	1.29	1.56	1.21		0.0733369	0.119946	0.377726	0.669085	0.884925	0.872229	0.228998	0.200691	0.087673	0.129588	0.193687	0.738344		1.7522	0.8764	1.1265	1.3653		100	100	100	100		Peptide	Modified Peptides	100001132	21282-10-0
1236			N,N-dimethyl-pro-pro	LC/MS pos early	64571					0.52	0.36	0.39	0.68	0.74	1.09		0.134608	0.176879	0.00837071	0.461729	0.0208642	0.498969	0.0524623	0.0872094	0.112341	0.145882	0.56869	0.908868		2.0859	1.0931	0.7441	0.8121		100	100	100	100		Peptide	Modified Peptides	100022041
1237	Carbohydrate	Glycolysis, Gluconeogenesis, and Pyruvate Metabolism	1,5-anhydroglucitol (1,5-AG)	LC/MS neg	20675	C07326	HMDB0002712	64960		0.57	1.61	1.42	2.83	2.5	0.88		0.128221	0.171038	0.961951	0.798344	0.824711	0.868761	0.131884	0.147029	0.0053921	0.0449856	0.640451	0.920108		1.1648	0.662	1.8727	1.6522		92	100	71	86		Carbohydrate	Glycolysis, Gluconeogenesis, and Pyruvate Metabolism	100000580	154-58-5
1240			glucose	LC/MS polar	48152	C00031	HMDB0000122	5793		1.18	1.28	1.23	1.09	1.05	0.96		0.233256	0.250946	0.150778	0.565266	0.172011	0.648226	0.358696	0.263125	0.717193	0.438145	0.691675	0.920108		1.0059	1.1836	1.2863	1.2377		100	100	100	100		Carbohydrate	Glycolysis, Gluconeogenesis, and Pyruvate Metabolism	572	50-99-7
1256			pyruvate	LC/MS polar	48990	C00022	HMDB0000243	1060		1.68	1.38	0.69	0.82	0.41	0.5		0.0474678	0.0931792	0.225893	0.579607	0.470347	0.755964	0.210294	0.191858	0.00251941	0.0408052	0.000170972	0.159028		1.0204	1.7137	1.4072	0.7028		100	100	100	100		Carbohydrate	Glycolysis, Gluconeogenesis, and Pyruvate Metabolism	823	127-17-3
1257			lactate	LC/MS polar	527	C00186	HMDB0000190	612		1.34	1.1	1.06	0.82	0.79	0.96		0.12251	0.164668	0.614788	0.742984	0.933561	0.87517	0.119743	0.137264	0.284288	0.271097	0.690584	0.920108		1.0313	1.3839	1.134	1.0887		100	100	100	100		Carbohydrate	Glycolysis, Gluconeogenesis, and Pyruvate Metabolism	482	79-33-4
1260			glycerate	LC/MS polar	1572	C00258	HMDB0006372 HMDB0000139	752;439194		0.9	0.89	0.99	0.99	1.1	1.11		0.63845	0.444495	0.542399	0.726638	0.849421	0.868761	0.741471	0.410855	0.259068	0.255282	0.260816	0.782573		1.0243	0.9225	0.9095	1.0106		100	100	100	100		Carbohydrate	Glycolysis, Gluconeogenesis, and Pyruvate Metabolism	1052	600-19-1
1278		Pentose Metabolism	ribose	LC/MS polar	1471	C00121	HMDB0000283	5779		3.75	2.02	1.88	0.54	0.5	0.93		0.000103025	0.00344547	0.135459	0.551308	0.0100697	0.491602	0.0587627	0.0932126	0.0194154	0.0701875	0.732499	0.923804		0.6472	2.4246	1.3089	1.2166		92	100	86	100		Carbohydrate	Pentose Metabolism	914	50-69-1
1279			ribitol	LC/MS polar	15772	C00532 C01904 C00474 C00379	HMDB0002917 HMDB0000508 HMDB0001851 HMDB0000568	6912		1.1	1.05	1.05	0.95	0.95	1		0.288566	0.285452	0.340973	0.640672	0.725153	0.849177	0.665464	0.381408	0.559346	0.38501	0.651734	0.920108		1.0337	1.1369	1.0803	1.0813		100	100	100	100		Carbohydrate	Pentose Metabolism	100000406	488-81-3
1280			ribonate	LC/MS polar	27731	C01685	HMDB0000867	5460677		1.1	0.97	1.15	0.88	1.05	1.18		0.564828	0.422203	0.935536	0.793437	0.490096	0.756342	0.346171	0.261652	0.732292	0.442854	0.269534	0.78716		1.0551	1.1595	1.0246	1.2128		100	100	100	100		Carbohydrate	Pentose Metabolism	100001007	5336-08-03
1286			arabinose	LC/MS polar	575	C00216	HMDB0029942	66308		0.49	0.95	0.79	1.93	1.61	0.83		0.115247	0.158124	0.901279	0.789259	0.727248	0.850477	0.306857	0.239694	0.334039	0.291377	0.686519	0.920108		1.6478	0.8125	1.5686	1.3084		83	86	100	86		Carbohydrate	Pentose Metabolism	828	28697-53-2
1294			arabitol/xylitol	LC/MS polar	48885	C00542 C01904 C00379	HMDB0002917 HMDB0001851 HMDB0000568	6912;94154		0.48	0.67	0.57	1.39	1.19	0.85		0.0151303	0.0527358	0.278798	0.600927	0.0785244	0.577955	0.000867551	0.0274573	0.0666245	0.113498	0.0535405	0.703731		1.6525	0.7901	1.0996	0.9392		100	100	100	100		Carbohydrate	Pentose Metabolism	100006430
1300			arabonate/xylonate	LC/MS polar	48255	C00502 C05411	HMDB0000539	122045;6602431		0.65	0.85	0.91	1.31	1.4	1.07		0.122402	0.164668	0.562653	0.726638	0.820761	0.868761	0.027817	0.0627601	0.00348812	0.0408052	0.120115	0.711613		1.2189	0.7896	1.035	1.1061		100	100	100	100		Carbohydrate	Pentose Metabolism	100006115
1305			sedoheptulose	LC/MS polar	53237	C02076	HMDB0003219	5459879		1.81	1.44	1.81	0.8	1	1.26		0.0165521	0.0535337	0.109924	0.551308	0.0730809	0.577955	0.377383	0.271201	0.87311	0.485021	0.554012	0.89775		0.6462	1.1671	0.9287	1.1689		83	100	100	86		Carbohydrate	Pentose Metabolism	100002619	3019-74-7
1307			lyxonate	LC/MS polar	61858		HMDB0060255			0.62	1.1	1.04	1.78	1.68	0.94		0.0460217	0.0913924	0.938038	0.793437	0.881381	0.872229	0.021835	0.0560408	0.0794579	0.122114	0.619372	0.920108		1.2702	0.7818	1.392	1.3151		100	100	100	100		Carbohydrate	Pentose Metabolism	100019968
1317		Glycogen Metabolism	maltose	LC/MS polar	15586	C00208	HMDB0000163	10991489		0.7	0.48	1.25	0.69	1.78	2.59		0.235604	0.252444	0.028199	0.519117	0.378152	0.738491	0.55717	0.3429	0.997014	0.51761	0.708112	0.920108		1.7057	1.2003	0.8231	2.1309		100	86	100	100		Carbohydrate	Glycogen Metabolism	913	6363-53-7
1343		Disaccharides and Oligosaccharides	sucrose	LC/MS polar	1519	C00089	HMDB0000258	5988		0.18	0.24	0.3	1.34	1.65	1.23		0.00862973	0.0375725	0.0346954	0.520187	0.0882163	0.577955	0.311952	0.242055	0.186694	0.203962	0.377188	0.819254		2.9549	0.5364	0.7195	0.8856		92	71	100	100		Carbohydrate	Disaccharides and Oligosaccharides	935	57-50-1
1364		Fructose, Mannose and Galactose Metabolism	fructose	LC/MS polar	577	C00095	HMDB0000660	2723872		0.81	1.06	1.07	1.32	1.33	1.01		0.268152	0.272436	0.54107	0.726638	0.614934	0.807658	0.0165645	0.0519296	0.0238461	0.0732182	0.937293	0.94919		1.0741	0.8657	1.14	1.1482		100	100	100	100		Carbohydrate	Fructose, Mannose and Galactose Metabolism	878	57-48-7
1369			mannitol/sorbitol	LC/MS polar	46142	C00392 C00794	HMDB0000247 HMDB0000765	6251;5780		0.78	1.1	0.85	1.42	1.09	0.77		0.480452	0.387167	0.880649	0.786109	0.863944	0.868761	0.671037	0.38366	0.403509	0.321256	0.958309	0.950247		1.4532	1.1277	1.6049	1.2332		100	100	100	100		Carbohydrate	Fructose, Mannose and Galactose Metabolism	100001740
1370			mannose	LC/MS polar	48153	C00159 C02209 C00936	HMDB0000169	185698;82308;18950;439680		1.2	1.1	1.12	0.92	0.93	1.01		0.199328	0.229053	0.571003	0.730901	0.637225	0.818713	0.361983	0.264612	0.488207	0.359219	0.909155	0.942048		0.9954	1.1913	1.0971	1.1131		100	100	100	100		Carbohydrate	Fructose, Mannose and Galactose Metabolism	803	3458-28-4
1424		Aminosugar Metabolism	glucuronate	LC/MS polar	15443	C16245	HMDB0000127	441478;94715;23677976;65041;444791		0.71	0.71	0.62	1	0.87	0.87		0.562847	0.422203	0.537812	0.726638	0.20473	0.662551	0.850023	0.438253	0.102491	0.139964	0.0179576	0.672423		1.4798	1.0551	1.0523	0.9156		100	100	100	100		Carbohydrate	Aminosugar Metabolism	100000257	207300-70-7
1436			N-acetylneuraminate	LC/MS polar	32377	C00270	HMDB0000230	439197		1.08	0.65	1.12	0.6	1.03	1.73		0.35171	0.323435	0.397076	0.67404	0.845073	0.868761	0.00770802	0.0379625	0.535159	0.37799	0.210321	0.743264		1.2274	1.33	0.7917	1.3711		100	100	100	100		Carbohydrate	Aminosugar Metabolism	1162	131-48-6
1448			N-acetylglucosaminylasparagine	LC/MS pos early	48149	C04540	HMDB0000489	123826		1.85	1.26	1.13	0.68	0.61	0.89		0.803688	0.486856	0.862277	0.785893	0.84141	0.868761	0.8617	0.44232	0.826531	0.476889	0.983529	0.952937		0.8319	1.5361	1.0514	0.9379		67	57	43	57		Carbohydrate	Aminosugar Metabolism	1215	2776-93-4
1449			erythronate*	LC/MS polar	42420		HMDB0000613	2781043		0.61	0.77	0.73	1.26	1.2	0.95		0.0604332	0.106464	0.503879	0.718904	0.343878	0.72078	0.0403339	0.0744839	0.0835551	0.126477	0.143655	0.734339		1.5193	0.9254	1.167	1.1069		100	100	100	100		Carbohydrate	Aminosugar Metabolism	100001320	88759-55-1
1451			N-acetylglucosamine/N-acetylgalactosamine	LC/MS pos early	46539	C01074	HMDB0000212 HMDB0000215	84265;439174		1.73	1.02	1.06	0.59	0.61	1.04		0.00455023	0.0247794	0.907714	0.789259	0.84697	0.868761	0.00524786	0.03673	0.00930241	0.0531239	0.780476	0.931556		0.9245	1.5967	0.9428	0.9781		100	100	100	100		Carbohydrate	Aminosugar Metabolism	100006435
1452			N-glycolylneuraminate	LC/MS pos early	37123	C03410	HMDB0000833	123802		1.3	0.68	1.51	0.53	1.17	2.21		0.0601208	0.106464	0.626745	0.743608	0.488976	0.755964	0.00190398	0.0274573	0.622244	0.408626	0.220655	0.743624		1.3322	1.7265	0.911	2.013		100	100	100	100		Carbohydrate	Aminosugar Metabolism	100001491	1113-83-3
1453		Advanced Glycation End-product	N6-carboxymethyllysine	LC/MS pos early	36713		HMDB0240347	123800		0.33	0.75	0.59	2.25	1.78	0.79		0.00387114	0.0227209	0.743049	0.773858	0.233932	0.682672	0.00826578	0.0391061	0.053573	0.101214	0.260536	0.782573		1.6213	0.5411	1.2189	0.9628		100	100	100	100		Carbohydrate	Advanced Glycation End-product	100001768	5746-04-03
1457	Energy	TCA Cycle	citrate	LC/MS neg	1564	C00158	HMDB0000094	311		0.98	1.02	0.97	1.04	0.99	0.95		0.846748	0.500174	0.87127	0.785893	0.892496	0.87517	0.973185	0.475155	0.632296	0.41321	0.316483	0.81569		1.0857	1.0614	1.104	1.0519		100	100	100	100		Energy	TCA Cycle	1124	77-92-9
1459			aconitate [cis or trans]	LC/MS neg	46173	C02341 C004174	HMDB0000958 HMDB000072	643757;444212		1.07	0.9	0.86	0.84	0.8	0.95		0.343664	0.321333	0.644544	0.747594	0.465808	0.755964	0.118596	0.137124	0.128626	0.158824	0.4744	0.866632		1.1405	1.2214	1.0319	0.9817		100	100	100	100		Energy	TCA Cycle	100001359
1463			alpha-ketoglutarate	LC/MS polar	528	C00026	HMDB0000208	51		2.62	1.71	1.3	0.65	0.49	0.76		0.000490385	0.00800702	0.0626132	0.551308	0.506753	0.766981	0.0728767	0.105067	0.0239099	0.0732182	0.123819	0.722722		0.6786	1.778	1.159	0.8788		100	100	100	100		Energy	TCA Cycle	93	305-72-6;328-50-7;22202-68-2
1465			succinylcarnitine (C4-DC)	LC/MS pos early	37058		HMDB0061717	71464481		0.62	0.79	0.73	1.28	1.18	0.93		0.03956	0.0862657	0.402207	0.679832	0.244604	0.682672	0.12371	0.139919	0.341326	0.295236	0.0104412	0.672423		1.4666	0.9027	1.1525	1.0662		100	100	100	100		Energy	TCA Cycle	100001948	256928-74-2
1466			succinate	LC/MS polar	1437	C00042	HMDB0000254	1110		1.41	1.17	1.32	0.83	0.93	1.12		0.000602757	0.00884441	0.425499	0.683882	0.37535	0.73724	0.174756	0.173683	0.452519	0.341973	0.67478	0.920108		0.8844	1.2454	1.0351	1.1642		100	100	100	100		Energy	TCA Cycle	252	110-15-6
1467			fumarate	LC/MS polar	1643	C00122	HMDB0000134	444972		1.82	1.42	1.56	0.78	0.86	1.1		0.00299084	0.0192667	0.0862393	0.551308	0.125442	0.638125	0.144376	0.155392	0.349689	0.299534	0.813159	0.935671		0.7803	1.4164	1.1103	1.22		100	100	100	100		Energy	TCA Cycle	330	100-17-8
1469			malate	LC/MS neg	1303	C00497 C00149 C00711	HMDB0000744 HMDB0031518 HMDB0000156	525		1.87	1.47	1.64	0.79	0.88	1.11		0.00129005	0.0113576	0.0489423	0.551308	0.138596	0.638125	0.159577	0.163109	0.362897	0.304962	0.913165	0.942048		0.7241	1.353	1.0662	1.187		100	100	100	100		Energy	TCA Cycle	409	6915-15-7
1478			2-methylcitrate/homocitrate	LC/MS neg	52282	C01251	HMDB0003518 HMDB0000379	515;439459		1.06	1.24	1.11	1.16	1.04	0.89		0.615932	0.436137	0.106601	0.551308	0.252892	0.682672	0.0386829	0.0744839	0.64157	0.414093	0.419604	0.841143		1.0421	1.1079	1.2878	1.1523		100	100	100	100		Energy	TCA Cycle	100008929
1486		Oxidative Phosphorylation	phosphate	LC/MS pos early	42109	C00009	HMDB0001429	1061		1.93	0.83	0.64	0.43	0.33	0.76		0.0110393	0.0425646	0.562741	0.726638	0.0618227	0.577955	0.00111272	0.0274573	0.0019904	0.0408052	0.106818	0.703731		1.2096	2.3348	1.0054	0.7681		100	100	100	100		Energy	Oxidative Phosphorylation	461	7664-38-2
1489	Lipid	Fatty Acid Synthesis	malonylcarnitine	LC/MS pos early	37059		HMDB0002095	22833583		0.59	0.47	0.52	0.8	0.88	1.11		0.687746	0.457548	0.230703	0.579607	0.365162	0.73051	0.163811	0.166707	0.27071	0.262457	0.260463	0.782573		1.2103	0.7105	0.5673	0.6275		58	86	29	43		Lipid	Fatty Acid Synthesis	100001526	853728-01-5
1490			malonate	LC/MS neg	15872	C00383	HMDB0000691	867		0.95	0.97	1.04	1.02	1.09	1.07		0.971863	0.534765	0.948281	0.798344	0.757424	0.854631	0.969346	0.475155	0.71883	0.438354	0.602359	0.920108		1.078	1.0268	1.0454	1.1186		100	100	100	100		Lipid	Fatty Acid Synthesis	818	141-82-2;26522-22-85-0
1505		Short Chain Fatty Acid	butyrate/isobutyrate (4:0)	LC/MS neg	40605	C00246	HMDB0000039	264		1.56	2.41	5.77	1.54	3.7	2.39		0.0826903	0.129088	0.20653	0.579607	0.11336	0.638125	0.718155	0.40031	0.321338	0.286362	0.564195	0.904793		0.8237	1.2858	1.9853	4.7532		100	100	100	100		Lipid	Short Chain Fatty Acid	1143	109-92-6
1507		Medium Chain Fatty Acid	caproate (6:0)	LC/MS neg	32489	C01585	HMDB0000535	8892		0.96	0.89	0.94	0.93	0.98	1.05		0.675718	0.45365	0.498927	0.716481	0.752279	0.854631	0.981765	0.477336	0.861625	0.484348	0.802216	0.935671		1.1177	1.0695	0.9996	1.0515		100	100	100	100		Lipid	Medium Chain Fatty Acid	926	142-62-1
1508			heptanoate (7:0)	LC/MS neg	1644	C17714	HMDB0000666	8094		0.75	0.65	0.74	0.86	0.99	1.15		0.0705325	0.117163	0.002716	0.32773	0.0669949	0.577955	0.22387	0.199413	0.974918	0.512314	0.400291	0.825559		1.3708	1.0293	0.8879	1.021		100	100	100	100		Lipid	Medium Chain Fatty Acid	925	111-14-8
1516			(2 or 3)-decenoate (10:1n7 or n8)	LC/MS neg	63436					1.07	0.58	0.56	0.54	0.52	0.96		0.839212	0.49642	0.0781397	0.551308	0.0582164	0.577955	0.0802922	0.11031	0.055858	0.103584	0.923988	0.947561		0.9353	1.0033	0.5424	0.5208		83	86	57	43		Lipid	Medium Chain Fatty Acid	100021502
1520			laurate (12:0)	LC/MS neg	1645	C02679	HMDB0000638	3893		1.14	1.02	0.99	0.89	0.87	0.97		0.732888	0.469708	0.954372	0.798344	0.902037	0.87517	0.659755	0.379671	0.756151	0.454406	0.967466	0.952347		1.1185	1.2726	1.1363	1.1029		100	100	100	100		Lipid	Medium Chain Fatty Acid	181	143-07-7
1522			5-dodecenoate (12:1n7)	LC/MS neg	33968		HMDB0000529	5312378		0.92	0.67	0.63	0.73	0.68	0.94		0.571477	0.422203	0.495525	0.716481	0.392646	0.744374	0.129672	0.145605	0.0706019	0.116999	0.940442	0.94919		1.4277	1.3205	0.9595	0.9016		100	100	100	100		Lipid	Medium Chain Fatty Acid	100001232	2430-94-6
1525		Long Chain Saturated Fatty Acid	myristate (14:0)	LC/MS neg	1365	C06424	HMDB0000806	11005		1.08	0.95	0.73	0.88	0.67	0.77		0.834858	0.495324	0.779377	0.778124	0.274348	0.68724	0.976841	0.475803	0.374213	0.309689	0.095024	0.703731		1.1344	1.2288	1.077	0.8271		100	100	100	100		Lipid	Long Chain Saturated Fatty Acid	519	544-63-8
1527			pentadecanoate (15:0)	LC/MS neg	1361	C16537	HMDB0000826	13849		1.23	1.1	0.9	0.89	0.73	0.82		0.449988	0.375353	0.301059	0.618792	0.749744	0.854631	0.949168	0.469173	0.440321	0.337237	0.0716848	0.703731		0.9815	1.2046	1.0772	0.8816		100	100	100	100		Lipid	Long Chain Saturated Fatty Acid	980	1002-84-2;10002-84-2
1528			palmitate (16:0)	LC/MS neg	1336	C00249	HMDB0000220	985		1.28	1.22	1.01	0.96	0.79	0.82		0.17089	0.21015	0.175448	0.579607	0.868044	0.868761	0.883398	0.449997	0.356711	0.300778	0.173592	0.734339		1.0009	1.2828	1.2257	1.0085		100	100	100	100		Lipid	Long Chain Saturated Fatty Acid	424	57-10-3
1530			margarate (17:0)	LC/MS neg	1121		HMDB0002259	10465		1.31	1.15	0.88	0.88	0.67	0.76		0.166768	0.206791	0.179205	0.579607	0.86466	0.868761	0.794905	0.423378	0.289459	0.272624	0.0883921	0.703731		1.0172	1.3341	1.1674	0.8921		100	100	100	100		Lipid	Long Chain Saturated Fatty Acid	891	506-12-7
1532			stearate (18:0)	LC/MS neg	1358	C01530	HMDB0000827	5281		1.28	1.21	1.08	0.94	0.85	0.89		0.0693271	0.116258	0.124972	0.551308	0.745258	0.854631	0.753173	0.412014	0.401232	0.320355	0.27112	0.788061		0.9248	1.1832	1.1178	1.0002		100	100	100	100		Lipid	Long Chain Saturated Fatty Acid	439	57-11-4
1534			nonadecanoate (19:0)	LC/MS neg	1356	C16535	HMDB0000772	12591		1.05	1.21	1.06	1.15	1.01	0.88		0.390675	0.343948	0.169176	0.579607	0.838011	0.868761	0.527925	0.333696	0.756544	0.454406	0.211875	0.743264		0.9487	0.9943	1.1445	1.0022		100	100	100	100		Lipid	Long Chain Saturated Fatty Acid	892	646-30-0
1535			arachidate (20:0)	LC/MS neg	1118	C06425	HMDB0002212	10467		0.92	1.01	1.01	1.1	1.1	1		0.733782	0.469708	0.680775	0.761696	0.919102	0.87517	0.397736	0.278673	0.757724	0.454406	0.801203	0.935671		1.057	0.9722	1.0647	1.0673		100	100	100	100		Lipid	Long Chain Saturated Fatty Acid	893	506-30-9
1544		Long Chain Monounsaturated Fatty Acid	myristoleate (14:1n5)	LC/MS neg	32418	C08322	HMDB0002000	5281119		0.96	0.88	0.65	0.91	0.67	0.74		0.820615	0.491035	0.844847	0.785893	0.37621	0.737253	0.946896	0.469043	0.34914	0.299534	0.100054	0.703731		1.4208	1.3707	1.2448	0.9177		100	100	100	100		Lipid	Long Chain Monounsaturated Fatty Acid	100001198	544-64-9
1547			palmitoleate (16:1n7)	LC/MS neg	33447	C08362	HMDB0003229	445638		1.12	1.27	0.9	1.14	0.8	0.71		0.543698	0.414432	0.33951	0.640672	0.868409	0.868761	0.784331	0.419669	0.560032	0.38501	0.160943	0.734339		1.1882	1.3326	1.5133	1.0696		100	100	100	100		Lipid	Long Chain Monounsaturated Fatty Acid	452	373-49-9
1549			10-heptadecenoate (17:1n7)	LC/MS neg	33971		HMDB0060038	5312435		1.22	1.05	0.73	0.86	0.6	0.7		0.465928	0.383186	0.3091	0.620283	0.606528	0.80654	0.993129	0.47912	0.374673	0.309689	0.0737335	0.703731		1.1138	1.3548	1.1667	0.8126		100	100	100	100		Lipid	Long Chain Monounsaturated Fatty Acid	100001278	29743-97-3
1551			oleate/vaccenate (18:1)	LC/MS neg	52285	C01712 C08367 C00712 C21944	HMDB0000207 HMDB0000573 HMDB0003231 HMDB0240219	637517;445639;5281127;5282761		1.24	1.26	0.91	1.01	0.73	0.72		0.209955	0.236979	0.182221	0.579607	0.698566	0.843715	0.974354	0.475155	0.300162	0.275233	0.126325	0.725306		1.0191	1.2678	1.2826	0.9276		100	100	100	100		Lipid	Long Chain Monounsaturated Fatty Acid	100008930
1558			10-nonadecenoate (19:1n9)	LC/MS neg	33972		HMDB0013622	5312513		1.14	1.11	0.86	0.97	0.75	0.77		0.231915	0.25034	0.231286	0.579607	0.827458	0.868761	0.951372	0.469699	0.325305	0.288836	0.101832	0.703731		0.9794	1.1181	1.0831	0.8384		100	100	100	100		Lipid	Long Chain Monounsaturated Fatty Acid	100001277	73033-09-7
1561			eicosenoate (20:1)	LC/MS neg	33587	C16526	HMDB0002231 HMDB0062436	5282769;5282768;94159		0.98	1.02	0.86	1.04	0.88	0.84		0.237684	0.25303	0.225328	0.579607	0.936917	0.87517	0.922628	0.46044	0.442225	0.337237	0.219475	0.743624		1.2541	1.2256	1.2794	1.0773		100	100	100	100		Lipid	Long Chain Monounsaturated Fatty Acid	100001335
1565			erucate (22:1n9)	LC/MS neg	1552	C08316	HMDB0002068	8216;5281116		0.28	0.41	0.36	1.48	1.28	0.86		0.773217	0.47827	0.632958	0.743608	0.900932	0.87517	0.0555484	0.0897148	0.610416	0.405235	0.681063	0.920108		4.1399	1.1572	1.711	1.4789		100	100	100	100		Lipid	Long Chain Monounsaturated Fatty Acid	1087	112-86-7
1568		Long Chain Polyunsaturated Fatty Acid (n3 and n6)	tetradecadienoate (14:2)*	LC/MS neg	62850		HMDB0000560	5312409		0.93	0.86	0.57	0.92	0.61	0.66		0.506547	0.397413	0.865265	0.785893	0.25238	0.682672	0.475952	0.312765	0.0495304	0.0972406	0.0394273	0.672423		1.3917	1.3007	1.1951	0.7926		100	100	100	100		Lipid	Long Chain Polyunsaturated Fatty Acid (n3 and n6)	100020343	39039-37-7
1569			hexadecatrienoate (16:3n3)	LC/MS neg	57651			91820460		0.38	0.59	0.42	1.57	1.1	0.7		0.046196	0.0913949	0.231494	0.579607	0.0794644	0.577955	0.812977	0.428131	0.881493	0.486284	0.692383	0.920108		2.0998	0.791	1.2454	0.8721		100	100	86	86		Lipid	Long Chain Polyunsaturated Fatty Acid (n3 and n6)	100009393	7561-64-0
1570			heptadecatrienoate (17:3)*	LC/MS neg	62383	C16344		16061034		1.83	1.67	1.12	0.91	0.61	0.67		0.309246	0.298093	0.234673	0.579607	0.528716	0.778204	0.938592	0.465918	0.207958	0.219935	0.276695	0.794335		0.8822	1.6167	1.4729	0.9907		33	57	57	43		Lipid	Long Chain Polyunsaturated Fatty Acid (n3 and n6)	100020715
1575			stearidonate (18:4n3)	LC/MS neg	33969	C16300	HMDB0006547	5312508		0.71	0.93	0.63	1.31	0.89	0.68		0.578412	0.424949	0.762172	0.778124	0.430525	0.744947	0.369276	0.267432	0.901305	0.490204	0.18711	0.734339		1.4784	1.055	1.3787	0.9384		92	100	100	100		Lipid	Long Chain Polyunsaturated Fatty Acid (n3 and n6)	100001229	111174-40-4
1578			eicosapentaenoate (EPA; 20:5n3)	LC/MS neg	18467	C06428	HMDB0001999	446284		0.48	0.81	0.88	1.71	1.85	1.08		0.306372	0.296688	0.884901	0.786109	0.807182	0.866266	0.0840961	0.114193	0.115517	0.148094	0.80577	0.935671		1.6058	0.7642	1.3031	1.4112		100	100	100	100		Lipid	Long Chain Polyunsaturated Fatty Acid (n3 and n6)	2050	10-2005-9;10417-94-4
1579			heneicosapentaenoate (21:5n3)	LC/MS neg	57658			11998573		0.63	0.73	0.55	1.16	0.87	0.75		0.50224	0.397159	0.882323	0.786109	0.259742	0.682672	0.440315	0.294974	0.547673	0.382266	0.0887552	0.703731		1.5488	0.9805	1.1327	0.8502		92	100	100	100		Lipid	Long Chain Polyunsaturated Fatty Acid (n3 and n6)	100015797	24257-10-1
1580			docosapentaenoate (n3 DPA; 22:5n3)	LC/MS neg	32504	C16513	HMDB0001976 HMDB0006528	6441454		0.86	0.98	0.77	1.15	0.9	0.79		0.639267	0.444495	0.499002	0.716481	0.964451	0.882192	0.754852	0.412014	0.582553	0.394025	0.199982	0.743264		1.335	1.1423	1.3125	1.0329		100	100	100	100		Lipid	Long Chain Polyunsaturated Fatty Acid (n3 and n6)	100001181	2234-74-4
1581			docosahexaenoate (DHA; 22:6n3)	LC/MS neg	44675	C06429	HMDB0002183	445580		1.03	0.96	0.94	0.94	0.91	0.97		0.381308	0.337955	0.58007	0.733209	0.872773	0.870829	0.715936	0.39955	0.527239	0.37477	0.235902	0.766014		1.1096	1.1421	1.0695	1.0399		100	100	100	100		Lipid	Long Chain Polyunsaturated Fatty Acid (n3 and n6)	100000665	6217-54-5
1584			hexadecadienoate (16:2n6)	LC/MS neg	57652		HMDB0000477	13932172		1.01	1.2	0.79	1.18	0.77	0.65		0.759294	0.475222	0.540572	0.726638	0.524816	0.778204	0.752671	0.412014	0.445865	0.338983	0.174286	0.734339		1.2303	1.2486	1.4771	0.9672		100	100	100	100		Lipid	Long Chain Polyunsaturated Fatty Acid (n3 and n6)	100009394	28290-73-5
1585			linoleate (18:2n6)	LC/MS neg	1105	C01595	HMDB0000673 HMDB0006270	5280450		1.13	1.33	0.98	1.18	0.87	0.73		0.538981	0.412303	0.232755	0.579607	0.827142	0.868761	0.585139	0.35241	0.547183	0.382266	0.144004	0.734339		1.1312	1.2825	1.5098	1.1097		100	100	100	100		Lipid	Long Chain Polyunsaturated Fatty Acid (n3 and n6)	180	60-33-3
1587			linolenate [alpha or gamma; (18:3n3 or 6)]	LC/MS neg	34035	C06426 C06427	HMDB0001388 HMDB0003073	5280933;5280934		1.03	1.62	1.14	1.56	1.1	0.7		0.762351	0.47582	0.306273	0.620283	0.979953	0.882192	0.319094	0.246369	0.799817	0.466294	0.187006	0.734339		1.2793	1.3225	2.067	1.4526		100	100	100	100		Lipid	Long Chain Polyunsaturated Fatty Acid (n3 and n6)	100001337
1588			dihomo-linoleate (20:2n6)	LC/MS neg	17805	C16525	HMDB0005060	6439848		0.95	1.01	0.89	1.06	0.93	0.88		0.571022	0.422203	0.5176	0.720287	0.956388	0.880225	0.891923	0.452366	0.65702	0.417425	0.448417	0.855403		1.2119	1.1522	1.2183	1.0752		100	100	100	100		Lipid	Long Chain Polyunsaturated Fatty Acid (n3 and n6)	1231	2091-39-6
1590			dihomo-linolenate (20:3n3 or n6)	LC/MS neg	35718	C03242	HMDB0002925	5280581		1.01	1.33	1.14	1.33	1.13	0.85		0.889573	0.515813	0.143721	0.551308	0.599014	0.805222	0.252329	0.212614	0.70845	0.434713	0.298197	0.795136		0.9647	0.9702	1.2858	1.096		100	100	100	100		Lipid	Long Chain Polyunsaturated Fatty Acid (n3 and n6)	100001739	17046-59-2
1591			arachidonate (20:4n6)	LC/MS neg	1110	C00219	HMDB0001043	444899		1.25	1.43	1.43	1.15	1.14	1		0.0843874	0.129583	0.134083	0.551308	0.19144	0.653939	0.816275	0.428536	0.885722	0.486284	0.812684	0.935671		0.8244	1.03	1.182	1.1792		100	100	100	100		Lipid	Long Chain Polyunsaturated Fatty Acid (n3 and n6)	229	506-32-1
1593			adrenate (22:4n6)	LC/MS neg	32980	C16527	HMDB0002226	5497181;5282844		1.32	1.17	1.03	0.89	0.78	0.88		0.0494815	0.0947029	0.216211	0.579607	0.540901	0.778204	0.565086	0.345263	0.340128	0.294707	0.43064	0.845053		1.2785	1.6926	1.499	1.3221		100	100	100	100		Lipid	Long Chain Polyunsaturated Fatty Acid (n3 and n6)	100001193	2091-25-0
1594			docosapentaenoate (n6 DPA; 22:5n6)	LC/MS neg	37478	C16513	HMDB0001976	6441454		1.15	1.13	1.04	0.98	0.9	0.92		0.193452	0.224591	0.689376	0.765903	0.43985	0.74548	0.440774	0.294974	0.64595	0.414093	0.80279	0.935671		0.9833	1.1308	1.112	1.0221		83	100	71	100		Lipid	Long Chain Polyunsaturated Fatty Acid (n3 and n6)	100001580	25182-74-5
1595			docosadienoate (22:2n6)	LC/MS neg	32415	C16533	HMDB0061714	5282807		0.77	0.82	0.76	1.06	0.98	0.92		0.87978	0.513375	0.855575	0.785893	0.686607	0.84334	0.624636	0.370274	0.784103	0.463042	0.48074	0.866632		1.3052	1.0093	1.0699	0.9868		100	100	100	100		Lipid	Long Chain Polyunsaturated Fatty Acid (n3 and n6)	100001182	7370-49-2
1654		Fatty Acid, Branched	(11 or 12)-methyltridecanoate (a14:0 or i14:0)	LC/MS neg	62758			51387508		1.03	0.69	0.62	0.66	0.6	0.9		0.613968	0.43533	0.581931	0.734178	0.341914	0.72078	0.266024	0.220716	0.103239	0.14004	0.548468	0.895819		1.2304	1.2711	0.8448	0.7581		100	100	100	86		Lipid	Fatty Acid, Branched	100020843
1657			branched-chain fatty acid 16:0**	LC/MS neg	62893					0.69	0.44	0.37	0.64	0.54	0.84		0.787046	0.481747	0.061994	0.551308	0.01649	0.491602	0.0150118	0.0493819	0.049261	0.0972406	0.294989	0.795136		2.0091	1.3789	0.8813	0.7435		92	100	100	86		Lipid	Fatty Acid, Branched	100021097
1660			(14 or 15)-methylpalmitate (a17:0 or i17:0)	LC/MS neg	38768	C16995	HMDB0061859	8181;17903417		1.17	1	0.66	0.86	0.57	0.66		0.219698	0.241825	0.204953	0.579607	0.769763	0.854631	0.837946	0.434906	0.184316	0.201803	0.0380242	0.672423		1.3018	1.5185	1.3013	0.8607		100	100	100	100		Lipid	Fatty Acid, Branched	100002945
1664			branched-chain fatty acid 18:0 (1)**	LC/MS neg	62875					0.73	0.65	0.54	0.89	0.74	0.83		0.894669	0.517192	0.591418	0.737301	0.287811	0.697616	0.632013	0.372532	0.334481	0.291377	0.275907	0.794335		1.5633	1.1351	1.0093	0.8422		92	100	100	100		Lipid	Fatty Acid, Branched	100021014
1666			(16 or 17)-methylstearate (a19:0 or i19:0)	LC/MS neg	38296		HMDB0037397	3083779		1.06	1.03	0.78	0.97	0.74	0.76		0.231164	0.250224	0.241119	0.586875	0.999636	0.888089	0.895783	0.452928	0.249165	0.248447	0.120089	0.711613		1.1658	1.2401	1.2063	0.9148		100	100	100	100		Lipid	Fatty Acid, Branched	100002356	2724-59-6
1675		Fatty Acid, Dicarboxylate	dimethylmalonic acid	LC/MS polar	42978		HMDB0002001	11686		0.81	1.01	0.76	1.25	0.94	0.75		0.619981	0.437332	0.671082	0.754522	0.422098	0.744374	0.137726	0.151869	0.43555	0.334175	0.0731932	0.703731		0.7807	0.635	0.7908	0.5946		58	43	71	43		Lipid	Fatty Acid, Dicarboxylate	100004251	595-46-0
1677			glutarate (C5-DC)	LC/MS polar	396	C00489	HMDB0000661	743;4418048		1.32	1.97	2.08	1.49	1.58	1.06		0.225624	0.246456	0.0762409	0.551308	0.0688618	0.577955	0.328148	0.251695	0.208186	0.219935	0.780194	0.931556		0.8141	1.0734	1.6033	1.6928		100	100	100	100		Lipid	Fatty Acid, Dicarboxylate	339	110-94-1
1680			3-methylglutarate/2-methylglutarate	LC/MS polar	54676		HMDB0000752 HMDB0000422	12046;12284		1.13	0.79	1.12	0.7	1	1.42		0.663745	0.450662	0.297001	0.618792	0.980313	0.882192	0.228502	0.200632	0.676967	0.423144	0.528932	0.884446		1.0589	1.1945	0.8383	1.189		92	100	86	86		Lipid	Fatty Acid, Dicarboxylate	100010834
1681			2-hydroxyglutarate	LC/MS pos early	37253	C02630	HMDB0059655	43		0.82	0.9	0.7	1.09	0.86	0.78		0.778792	0.480032	0.900864	0.789259	0.367227	0.732586	0.641679	0.374114	0.576624	0.391067	0.121663	0.716225		1.4318	1.1719	1.282	1.0062		100	100	100	100		Lipid	Fatty Acid, Dicarboxylate	100002070	40951-21-1
1683			adipate (C6-DC)	LC/MS polar	21134	C06104	HMDB0000448	196		1.4	0.77	0.83	0.55	0.59	1.07		0.7937	0.483578	0.249442	0.592053	0.416487	0.744374	0.411319	0.285063	0.54121	0.379835	0.661373	0.920108		1.268	1.7742	0.9801	1.0479		100	100	100	100		Lipid	Fatty Acid, Dicarboxylate	100000863	124-04-9
1685			2-hydroxyadipate	LC/MS polar	31934	C02360	HMDB0000321	193530		0.85	1.22	0.85	1.44	1	0.7		0.895303	0.517192	0.468464	0.711273	0.967571	0.882192	0.413736	0.285412	0.908729	0.493288	0.500806	0.870645		0.7349	0.6257	0.8979	0.6244		58	86	71	71		Lipid	Fatty Acid, Dicarboxylate	100001153	18294-85-4
1686			3-hydroxyadipate	LC/MS polar	62069		HMDB0000345	151913		0.32	0.56	0.49	1.78	1.54	0.86		0.0441309	0.0899982	0.629942	0.743608	0.422948	0.744374	0.0278582	0.0627601	0.00438463	0.0408052	0.633332	0.920108		2.1505	0.6791	1.2116	1.0436		92	100	100	100		Lipid	Fatty Acid, Dicarboxylate	100004396
1689			maleate	LC/MS polar	20676	C01384	HMDB0000176	444266		0.88	1.19	1.41	1.35	1.6	1.19		0.493157	0.392325	0.364758	0.663478	0.332057	0.72078	0.207046	0.190008	0.196625	0.21296	0.813811	0.935671		0.8956	0.7893	1.0628	1.2599		67	43	86	86		Lipid	Fatty Acid, Dicarboxylate	100000707	110-16-7
1691			pimelate (C7-DC)	LC/MS polar	15704	C02656	HMDB0000857	385		0.2	0.46	0.38	2.3	1.91	0.83		0.00027063	0.00563642	0.124779	0.551308	0.0367675	0.577955	0.00566958	0.03673	0.0165747	0.0663066	0.676278	0.920108		2.254	0.4489	1.0341	0.8577		100	57	100	100		Lipid	Fatty Acid, Dicarboxylate	100000101	111-16-0
1694			suberate (C8-DC)	LC/MS polar	15730	C08278	HMDB0000893	10457		0.23	0.44	0.48	1.88	2.06	1.09		0.000188041	0.004708	0.0198843	0.519117	0.0511598	0.577955	0.00743079	0.0378015	0.00895218	0.0517114	0.499956	0.870645		2.0316	0.4757	0.8962	0.9785		100	86	100	100		Lipid	Fatty Acid, Dicarboxylate	100000016	505-48-6
1697			azelate (C9-DC)	LC/MS neg	18362	C08261	HMDB0000784	2266		0.39	0.57	0.57	1.47	1.47	1		0.0183666	0.056058	0.0633751	0.551308	0.0667178	0.577955	0.175169	0.173723	0.154051	0.179331	0.838605	0.94052		1.881	0.7298	1.0694	1.0724		100	100	100	100		Lipid	Fatty Acid, Dicarboxylate	2029	123-99-9
1699			sebacate (C10-DC)	LC/MS neg	32398	C08277	HMDB0000792	5192		1.31	0.83	0.89	0.63	0.68	1.08		0.870327	0.510313	0.781185	0.778124	0.942662	0.87693	0.974493	0.475155	0.849822	0.482027	0.331824	0.81569		1.0957	1.4378	0.9052	0.9749		83	100	100	100		Lipid	Fatty Acid, Dicarboxylate	100001211	111-20-6
1701			undecanedioate (C11-DC)	LC/MS neg	42395		HMDB0000888	15816		0.61	0.65	0.67	1.07	1.1	1.03		0.0482301	0.0933221	0.0351578	0.520187	0.0881894	0.577955	0.647637	0.376269	0.667167	0.420154	0.94214	0.94919		1.3773	0.8421	0.8974	0.9287		100	86	100	100		Lipid	Fatty Acid, Dicarboxylate	100001617	1852-04-6
1704			dodecanedioate (C12-DC)	LC/MS neg	32388	C02678	HMDB0000623	12736		0.71	0.72	0.77	1.02	1.09	1.07		0.0688879	0.115889	0.104028	0.551308	0.1929	0.656331	0.956891	0.470997	0.586255	0.395464	0.344977	0.81569		1.3087	0.9231	0.9437	1.006		100	86	100	100		Lipid	Fatty Acid, Dicarboxylate	100001102	693-23-2
1706			dodecenedioate (C12:1-DC)*	LC/MS neg	61864		HMDB0000933	5283028		0.12	0.18	0.21	1.57	1.84	1.17		0.00202266	0.0146362	0.0244907	0.519117	0.056384	0.577955	0.103014	0.127299	0.183801	0.201678	0.905094	0.942048		3.8443	0.4462	0.7017	0.8231		100	57	86	71		Lipid	Fatty Acid, Dicarboxylate	100019972
1707			dodecadienoate (12:2)*	LC/MS neg	62276			25480		0.88	0.85	0.67	0.97	0.76	0.79		0.963881	0.532592	0.66919	0.754438	0.269723	0.683971	0.661822	0.379786	0.256796	0.254039	0.294674	0.795136		1.2855	1.1281	1.0923	0.8624		100	100	100	100		Lipid	Fatty Acid, Dicarboxylate	100020478
1709			tetradecanedioate (C14-DC)	LC/MS neg	35669		HMDB0000872	13185		0.69	0.79	0.84	1.15	1.22	1.07		0.0398001	0.0862657	0.0562876	0.551308	0.162353	0.648226	0.27072	0.223028	0.149273	0.176926	0.213965	0.743264		1.1935	0.8192	0.9385	1.0033		100	100	100	100		Lipid	Fatty Acid, Dicarboxylate	100001613	821-38-5
1713			hexadecanedioate (C16-DC)	LC/MS neg	35678	C19615	HMDB0000672	10459		0.74	0.79	0.86	1.06	1.17	1.1		0.0634285	0.109495	0.0846285	0.551308	0.336307	0.72078	0.535646	0.337206	0.286646	0.271798	0.416722	0.838983		1.2277	0.9101	0.9638	1.0619		100	100	100	100		Lipid	Fatty Acid, Dicarboxylate	100001614	505-54-4
1714			hexadecenedioate (C16:1-DC)*	LC/MS neg	61862					0.27	0.5	0.56	1.86	2.09	1.12		0.0017745	0.0135849	0.168371	0.579607	0.27191	0.68599	0.205941	0.189781	0.0450547	0.0931774	0.777523	0.931556		2.2534	0.601	1.119	1.2561		100	100	86	100		Lipid	Fatty Acid, Dicarboxylate	100019975
1715			heptadecanedioate (C17-DC)	LC/MS neg	62869			3083765		0.82	0.96	0.99	1.17	1.22	1.04		0.155188	0.196046	0.768829	0.778124	0.90466	0.87517	0.0181259	0.0532048	0.279028	0.267605	0.893967	0.942048		1.0945	0.8928	1.0468	1.0878		100	100	100	100		Lipid	Fatty Acid, Dicarboxylate	100019969	2424-90-0
1716			octadecanedioate (C18-DC)	LC/MS neg	36754		HMDB0000782	70095		0.86	0.93	0.77	1.07	0.9	0.83		0.598739	0.432071	0.878359	0.786109	0.296141	0.705044	0.570201	0.34726	0.398759	0.32012	0.141267	0.734339		1.1658	1.0046	1.0799	0.9017		100	100	100	100		Lipid	Fatty Acid, Dicarboxylate	100001615	871-70-5
1717			octadecenedioate (C18:1-DC)	LC/MS neg	61861			9543674		0.43	0.62	0.68	1.44	1.57	1.09		0.000923714	0.0101654	0.0222933	0.519117	0.0731813	0.577955	0.068776	0.102133	0.0673021	0.114265	0.959299	0.950247		1.4574	0.6259	0.8999	0.9853		100	100	100	100		Lipid	Fatty Acid, Dicarboxylate	100019978
1718			octadecadienedioate (C18:2-DC)*	LC/MS neg	61860					0.55	0.83	0.97	1.52	1.78	1.17		0.0171881	0.054695	0.408961	0.680312	0.687966	0.84334	0.0340659	0.0694876	0.0497283	0.0972406	0.885145	0.942048		1.1869	0.6477	0.9832	1.1525		100	100	100	86		Lipid	Fatty Acid, Dicarboxylate	100019982
1719			nonadecanedioate (C19-DC)	LC/MS neg	62867			12572015		1.07	1.14	1.1	1.07	1.03	0.97		0.704194	0.460943	0.293368	0.618352	0.751657	0.854631	0.468678	0.310093	0.989376	0.515776	0.465278	0.866632		1.0593	1.1301	1.21	1.1691		100	100	100	100		Lipid	Fatty Acid, Dicarboxylate	100019970	6250-70-0
1720			eicosanedioate (C20-DC)	LC/MS neg	39831			75502		0.87	1.02	0.94	1.17	1.09	0.93		0.769911	0.477494	0.592795	0.737301	0.866562	0.868761	0.252618	0.212614	0.539822	0.379835	0.356043	0.81569		1.0696	0.9272	1.0891	1.0093		100	100	100	100		Lipid	Fatty Acid, Dicarboxylate	100002951	2424-92-2
1721			eicosenedioate (C20:1-DC)*	LC/MS neg	62923					1.7	2.89	1.76	1.7	1.03	0.61		0.361787	0.326841	0.0476388	0.551308	0.137017	0.638125	0.155192	0.162625	0.59944	0.400062	0.328874	0.81569		0.8066	1.3737	2.3293	1.4198		58	86	100	86		Lipid	Fatty Acid, Dicarboxylate	100021105
1722			docosadioate (C22-DC)	LC/MS neg	39837	C14240		7641		0.81	0.91	0.88	1.12	1.07	0.96		0.832922	0.495324	0.764225	0.778124	0.937046	0.87517	0.436024	0.293477	0.532358	0.376809	0.63271	0.920108		1.1331	0.9228	1.0349	0.9916		100	100	100	100		Lipid	Fatty Acid, Dicarboxylate	100002952	505-56-6
1723			3-carboxy-4-methyl-5-propyl-2-furanpropanoate (CMPF)	LC/MS neg	31787		HMDB0061112	123979		1.85	1.91	1.05	1.04	0.57	0.55		0.716819	0.465745	0.236544	0.581105	0.4921	0.757005	0.310806	0.242055	0.865489	0.484353	0.424282	0.845053		0.7654	1.4144	1.4648	0.8063		42	57	86	71		Lipid	Fatty Acid, Dicarboxylate	100001178	86879-39-2
1727			2-hydroxysebacate	LC/MS neg	63357		HMDB0000424	128458		0.35	0.54	0.49	1.55	1.41	0.91		0.00410806	0.0235873	0.168665	0.579607	0.0772946	0.577955	0.0216991	0.0560408	0.0195624	0.0701875	0.556364	0.899994		1.7153	0.598	0.9284	0.8406		83	29	71	100		Lipid	Fatty Acid, Dicarboxylate	100020378	103963-71-9
1768		Fatty Acid, Amino	2-aminoheptanoate	LC/MS pos early	43761		HMDB0094649	227939		0.72	1.32	1.03	1.83	1.44	0.79		0.293287	0.289039	0.0736827	0.551308	0.6251	0.811838	0.0403842	0.0744839	0.00668602	0.0449856	0.250251	0.782573		1.054	0.7581	1.3861	1.0892		100	100	100	100		Lipid	Fatty Acid, Amino	100004542	1115-90-8
1773			2-aminooctanoate	LC/MS neg	43343		HMDB0000991	69522		1.43	1.16	1.15	0.81	0.8	0.99		0.15135	0.193439	0.453921	0.69994	0.422974	0.744374	0.365985	0.266288	0.157512	0.181971	0.972681	0.952347		1.0197	1.461	1.1862	1.1753		100	100	86	100		Lipid	Fatty Acid, Amino	100004227	644-90-6
1786		Fatty Acid Metabolism (also BCAA Metabolism)	butyrylcarnitine (C4)	LC/MS pos early	32412	C02862	HMDB0002013	439829		1.12	0.83	0.76	0.75	0.68	0.91		0.36465	0.327714	0.779743	0.778124	0.44464	0.747601	0.103591	0.127353	0.0332812	0.0796445	0.370659	0.819254		1.2759	1.4254	1.0631	0.9636		100	100	100	100		Lipid	Fatty Acid Metabolism (also BCAA Metabolism)	100001054	25576-40-3
1787			butyrylglycine	LC/MS neg	31850		HMDB0000808	88412		0.86	1.04	1.02	1.2	1.19	0.98		0.962387	0.532323	0.837499	0.785893	0.488637	0.755964	0.743262	0.41122	0.15019	0.177224	0.709837	0.920108		1.0487	0.9035	1.0885	1.0708		92	100	71	100		Lipid	Fatty Acid Metabolism (also BCAA Metabolism)	100001151	20208-73-5
1789			propionylcarnitine (C3)	LC/MS pos early	32452	C03017	HMDB0000824	107738		1.4	1.01	1.08	0.72	0.77	1.07		0.0424979	0.0887367	0.695844	0.767697	0.349439	0.72078	0.0133705	0.0464947	0.206478	0.219376	0.604315	0.920108		1.0271	1.4413	1.0349	1.1088		100	100	100	100		Lipid	Fatty Acid Metabolism (also BCAA Metabolism)	100001162	17298-37-2
1790			propionylglycine	LC/MS neg	31932		HMDB0000783	98681		0.46	1.72	1.38	3.77	3.03	0.8		0.0491269	0.0947029	0.15211	0.56757	0.163457	0.648226	0.0176055	0.0527163	0.00367545	0.0408052	0.67488	0.920108		1.1101	0.5068	1.9116	1.5372		92	100	100	100		Lipid	Fatty Acid Metabolism (also BCAA Metabolism)	100001150	21709-90-0
1792			methylmalonate (MMA)	LC/MS polar	1496	C02170	HMDB0000202	487		2.73	2.8	1.33	1.02	0.49	0.48		0.150093	0.192439	0.101167	0.551308	0.435185	0.744947	0.609147	0.364329	0.314482	0.282723	0.159795	0.734339		0.9753	2.6643	2.7283	1.3009		100	100	86	86		Lipid	Fatty Acid Metabolism (also BCAA Metabolism)	418	516-05-2
1799		Fatty Acid Metabolism (Acyl Glutamine)	hexanoylglutamine	LC/MS neg	54907					0.86	0.44	0.37	0.51	0.42	0.83		0.665316	0.450675	0.492886	0.716481	0.241109	0.682672	0.108652	0.131144	0.0617019	0.109183	0.156273	0.734339		1.6969	1.4649	0.7494	0.6212		33	57	43	43		Lipid	Fatty Acid Metabolism (Acyl Glutamine)	100001733
1823		Fatty Acid Metabolism (Acyl Glycine)	hexanoylglycine	LC/MS neg	35436		HMDB0000701	99463		1.33	1.18	0.85	0.89	0.64	0.72		0.400228	0.348296	0.852538	0.785893	0.499407	0.760651	0.213269	0.194193	0.161554	0.186212	0.37554	0.819254		1.6127	2.1405	1.9029	1.3747		100	100	100	86		Lipid	Fatty Acid Metabolism (Acyl Glycine)	100001527	24003-67-6
1835			N-octanoylglycine	LC/MS neg	43502		HMDB0000832	84290		1.28	0.97	0.96	0.76	0.75	0.99		0.575261	0.423814	0.70789	0.768423	0.857264	0.868761	0.185334	0.179983	0.429542	0.333125	0.719978	0.923804		0.9302	1.1899	0.9033	0.895		67	86	57	57		Lipid	Fatty Acid Metabolism (Acyl Glycine)	100003940	14246-53-8
1841			N-palmitoylglycine	LC/MS neg	42092		HMDB0013034	151008		0.74	0.93	0.96	1.26	1.31	1.04		0.019586	0.0574782	0.560661	0.726638	0.708336	0.848782	0.0918442	0.119896	0.0524203	0.100166	0.888125	0.942048		1.1739	0.8631	1.0861	1.1287		100	100	100	100		Lipid	Fatty Acid Metabolism (Acyl Glycine)	100003686	2441-41-0
1855			picolinoylglycine	LC/MS neg	63057		HMDB0059766	11788622		0.42	0.91	0.99	2.15	2.33	1.08		0.0077851	0.0353392	0.860119	0.785893	0.862971	0.868761	0.00512161	0.03673	0.0111645	0.0556562	0.953344	0.950247		1.357	0.5764	1.2383	1.3413		100	100	100	100		Lipid	Fatty Acid Metabolism (Acyl Glycine)	100021198	5616-29-5
1858		Fatty Acid Metabolism (Acyl Carnitine, Short Chain)	acetylcarnitine (C2)	LC/MS pos early	32198	C02571	HMDB0000201	7045767		1.15	0.52	0.48	0.45	0.42	0.92		0.361962	0.326841	0.141838	0.551308	0.0893018	0.577955	0.00569648	0.03673	0.0208288	0.0720218	0.769452	0.931556		1.8057	2.0764	0.938	0.8627		100	100	100	100		Lipid	Fatty Acid Metabolism (Acyl Carnitine, Short Chain)	100000802	5080-50-2
1862		Fatty Acid Metabolism (Acyl Carnitine, Medium Chain)	hexanoylcarnitine (C6)	LC/MS pos early	32328		HMDB0000756	6426853		1.18	0.49	0.45	0.41	0.38	0.92		0.258161	0.266348	0.111803	0.551308	0.0636485	0.577955	0.0167496	0.0521597	0.00645023	0.0449856	0.676338	0.920108		1.5857	1.8775	0.7723	0.7107		92	100	86	71		Lipid	Fatty Acid Metabolism (Acyl Carnitine, Medium Chain)	100000781	6920-35-0
1870			octanoylcarnitine (C8)	LC/MS pos late	33936	C02838	HMDB0000791	11953814;123701		1.02	0.51	0.46	0.5	0.45	0.88		0.753181	0.474205	0.0303954	0.519117	0.0154263	0.491602	0.0515943	0.0863812	0.0109783	0.0556562	0.335144	0.81569		1.556	1.5887	0.8002	0.7081		100	100	100	100		Lipid	Fatty Acid Metabolism (Acyl Carnitine, Medium Chain)	100001247	3671-77-0
1874			cis-3,4-methyleneheptanoylcarnitine	LC/MS pos late	64389					0.7	0.45	0.41	0.65	0.6	0.92		0.459228	0.379014	0.0241256	0.519117	0.0130615	0.491602	0.082691	0.112942	0.0238261	0.0732182	0.427353	0.845053		1.7393	1.2109	0.7833	0.7212		100	100	100	100		Lipid	Fatty Acid Metabolism (Acyl Carnitine, Medium Chain)	100021728
1876			4-methylnonanoylcarnitine	LC/MS pos late	63612					0.86	0.69	0.58	0.81	0.68	0.84		0.591429	0.42932	0.181169	0.579607	0.0612557	0.577955	0.166479	0.168321	0.10115	0.138888	0.0856752	0.703731		1.1033	0.9446	0.7628	0.6443		92	86	71	43		Lipid	Fatty Acid Metabolism (Acyl Carnitine, Medium Chain)	100021138
1878			decanoylcarnitine (C10)	LC/MS pos late	33941		HMDB0000651	10245190		1	0.61	0.51	0.61	0.51	0.84		0.658271	0.449602	0.138001	0.551308	0.0378052	0.577955	0.0163987	0.0517571	0.0042743	0.0408052	0.205922	0.743264		1.4771	1.4757	0.9056	0.7568		100	100	100	71		Lipid	Fatty Acid Metabolism (Acyl Carnitine, Medium Chain)	100001251	1492-27-9
1879			laurylcarnitine (C12)	LC/MS pos late	34534		HMDB000225	168381		0.7	0.5	0.4	0.72	0.58	0.8		0.35742	0.326648	0.0387794	0.547785	0.0171484	0.491602	0.0523557	0.0872094	0.0145753	0.0625165	0.196934	0.743264		1.8493	1.2858	0.923	0.7424		100	100	100	100		Lipid	Fatty Acid Metabolism (Acyl Carnitine, Medium Chain)	100001392	25518-54-1
1880		Fatty Acid Metabolism (Acyl Carnitine, Long Chain Saturated)	myristoylcarnitine (C14)	LC/MS pos late	33952		HMDB0005066	6426854		0.85	0.57	0.48	0.67	0.57	0.85		0.730391	0.469529	0.0600419	0.551308	0.0382493	0.577955	0.0408681	0.0745294	0.0457556	0.0942392	0.241629	0.770853		1.489	1.2666	0.8536	0.7217		100	100	100	100		Lipid	Fatty Acid Metabolism (Acyl Carnitine, Long Chain Saturated)	100001270	18822-89-4
1882			palmitoylcarnitine (C16)	LC/MS pos late	44681	C02990	HMDB0000222	461		0.96	0.68	0.68	0.71	0.71	1		0.742126	0.470961	0.167149	0.579607	0.223954	0.674391	0.0554736	0.0897148	0.154157	0.179331	0.607736	0.920108		1.284	1.2367	0.8777	0.8759		100	100	100	100		Lipid	Fatty Acid Metabolism (Acyl Carnitine, Long Chain Saturated)	100000776	6865-14-1
1883			margaroylcarnitine (C17)*	LC/MS pos late	57512		HMDB0006210	53477803		0.85	0.62	0.62	0.73	0.73	1.01		0.865241	0.509535	0.242869	0.587269	0.236842	0.682672	0.117461	0.136487	0.0988475	0.137956	0.805371	0.935671		1.2843	1.0946	0.7966	0.8022		100	100	100	100		Lipid	Fatty Acid Metabolism (Acyl Carnitine, Long Chain Saturated)	100004054	106182-29-0
1884			stearoylcarnitine (C18)	LC/MS pos late	34409		HMDB0000848	3006797		0.96	0.69	0.63	0.72	0.66	0.92		0.468079	0.383186	0.447312	0.69519	0.314726	0.72078	0.138002	0.151869	0.134359	0.164687	0.36957	0.819254		1.3268	1.2722	0.9115	0.8401		100	100	100	100		Lipid	Fatty Acid Metabolism (Acyl Carnitine, Long Chain Saturated)	100001391	18822-91-8
1885			arachidoylcarnitine (C20)*	LC/MS pos late	57513		HMDB0006460	53477833		0.76	0.67	0.58	0.89	0.76	0.86		0.559669	0.42162	0.255096	0.593264	0.0894601	0.577955	0.387689	0.275639	0.121109	0.152921	0.11049	0.703731		1.4597	1.1072	0.9839	0.8435		100	100	100	86		Lipid	Fatty Acid Metabolism (Acyl Carnitine, Long Chain Saturated)	100015833
1886			behenoylcarnitine (C22)*	LC/MS pos late	57514		HMDB0062468	71464577		0.85	0.99	0.76	1.17	0.89	0.76		0.76138	0.47582	0.912512	0.789259	0.353875	0.72078	0.575827	0.348415	0.256236	0.253986	0.19113	0.737666		1.1635	0.9879	1.1559	0.8841		92	100	86	71		Lipid	Fatty Acid Metabolism (Acyl Carnitine, Long Chain Saturated)	100015832
1887			lignoceroylcarnitine (C24)*	LC/MS pos late	57515		HMDB0240665			0.79	0.87	0.79	1.1	1	0.91		0.308078	0.29751	0.446331	0.69519	0.333001	0.72078	0.872595	0.446162	0.610143	0.405235	0.535153	0.88887		1.0893	0.8617	0.946	0.8643		100	100	100	100		Lipid	Fatty Acid Metabolism (Acyl Carnitine, Long Chain Saturated)	100015834
1888			cerotoylcarnitine (C26)*	LC/MS pos late	57516		HMDB0006347	53477828		0.57	0.7	0.73	1.22	1.27	1.04		0.0154629	0.0527358	0.0955223	0.551308	0.136056	0.638125	0.363237	0.265114	0.266081	0.260412	0.543099	0.892933		1.2228	0.7003	0.8547	0.8895		100	100	86	86		Lipid	Fatty Acid Metabolism (Acyl Carnitine, Long Chain Saturated)	100015835
1889		Fatty Acid Metabolism (Acyl Carnitine, Monounsaturated)	butenoylcarnitine (C4:1)	LC/MS pos early	61778					0.8	0.67	0.8	0.84	1	1.2		0.569424	0.422203	0.181043	0.579607	0.56767	0.792044	0.215364	0.195666	0.995415	0.517314	0.289221	0.795136		0.9015	0.7243	0.6057	0.7256		58	71	29	57		Lipid	Fatty Acid Metabolism (Acyl Carnitine, Monounsaturated)	100016058
1899			undecenoylcarnitine (C11:1)	LC/MS pos late	63613					0.93	0.75	0.65	0.8	0.7	0.87		0.782309	0.480976	0.22607	0.579607	0.103468	0.617178	0.426414	0.289511	0.0614409	0.109106	0.137856	0.734339		1.2552	1.1719	0.941	0.8188		100	100	100	100		Lipid	Fatty Acid Metabolism (Acyl Carnitine, Monounsaturated)	100021131
1900			5-dodecenoylcarnitine (C12:1)	LC/MS pos late	61769		HMDB13326	91825571		0.99	0.5	0.35	0.51	0.35	0.69		0.973485	0.5351	0.033471	0.519154	0.000884032	0.491602	0.0844909	0.114397	0.000867478	0.0408052	0.205425	0.743264		1.4647	1.4553	0.7355	0.5093		100	100	100	100		Lipid	Fatty Acid Metabolism (Acyl Carnitine, Monounsaturated)	100016069
1902			myristoleoylcarnitine (C14:1)*	LC/MS pos late	48182		HMDB0240588	129691961		0.65	0.48	0.38	0.74	0.59	0.79		0.109261	0.152284	0.00670962	0.442297	0.00208394	0.491602	0.155341	0.162625	0.0218911	0.0724022	0.187938	0.734491		1.7486	1.1371	0.8467	0.6698		100	100	100	100		Lipid	Fatty Acid Metabolism (Acyl Carnitine, Monounsaturated)	100006051	889848-55-9
1903			palmitoleoylcarnitine (C16:1)*	LC/MS pos late	53223		HMDB0013207	71464547		0.77	0.52	0.53	0.68	0.69	1.02		0.302113	0.294985	0.00337498	0.32773	0.0140541	0.491602	0.025634	0.0604747	0.0862535	0.128605	0.85601	0.942048		1.4515	1.1104	0.7532	0.7659		100	100	100	100		Lipid	Fatty Acid Metabolism (Acyl Carnitine, Monounsaturated)	100009406
1904			oleoylcarnitine (C18:1)	LC/MS pos late	35160		HMDB0005065	6441392		0.93	0.62	0.56	0.66	0.6	0.91		0.668086	0.451055	0.128923	0.551308	0.115635	0.638125	0.0455996	0.0789592	0.0986543	0.137956	0.365823	0.819254		1.4499	1.3482	0.8939	0.8098		100	100	100	100		Lipid	Fatty Acid Metabolism (Acyl Carnitine, Monounsaturated)	100001501	38677-66-6
1905			eicosenoylcarnitine (C20:1)*	LC/MS pos late	57519					0.64	0.53	0.58	0.84	0.91	1.08		0.127404	0.170379	0.0321561	0.519117	0.0700381	0.577955	0.25853	0.216809	0.515957	0.37066	0.390262	0.825559		1.586	1.0118	0.8478	0.9194		100	100	100	86		Lipid	Fatty Acid Metabolism (Acyl Carnitine, Monounsaturated)	100015838
1906			erucoylcarnitine (C22:1)*	LC/MS pos late	57525					0.54	0.48	0.34	0.89	0.62	0.7		0.214115	0.239583	0.0920258	0.551308	0.0092551	0.491602	0.504339	0.324049	0.0975638	0.13734	0.216916	0.743264		1.2685	0.6892	0.6136	0.4269		92	71	29	29		Lipid	Fatty Acid Metabolism (Acyl Carnitine, Monounsaturated)	100015841
1907			nervonoylcarnitine (C24:1)*	LC/MS pos late	57531		HMDB0006509			0.83	0.77	0.6	0.93	0.73	0.78		0.587079	0.428339	0.3128	0.620283	0.0861236	0.577955	0.298204	0.235296	0.0408009	0.0880016	0.0527658	0.703731		1.3432	1.1098	1.0331	0.8081		100	100	86	71		Lipid	Fatty Acid Metabolism (Acyl Carnitine, Monounsaturated)	100015846
1908			ximenoylcarnitine (C26:1)*	LC/MS pos late	57517					0.7	0.63	0.63	0.9	0.9	1		0.0781765	0.124011	0.0488928	0.551308	0.0475869	0.577955	0.137807	0.151869	0.320688	0.286362	0.686496	0.920108		1.3664	0.9597	0.8602	0.863		100	100	86	71		Lipid	Fatty Acid Metabolism (Acyl Carnitine, Monounsaturated)	100015836
1909		Fatty Acid Metabolism (Acyl Carnitine, Polyunsaturated)	linoleoylcarnitine (C18:2)*	LC/MS pos late	46223		HMDB0006469	6450015		1	0.68	0.58	0.68	0.58	0.85		0.637432	0.444495	0.129271	0.551308	0.0811756	0.577955	0.0591167	0.0932912	0.0791874	0.122072	0.31125	0.813219		1.3354	1.3289	0.9095	0.7712		100	100	100	100		Lipid	Fatty Acid Metabolism (Acyl Carnitine, Polyunsaturated)	100003151	36816-10-1
1910			linolenoylcarnitine (C18:3)*	LC/MS pos late	57511					0.87	0.77	0.66	0.88	0.76	0.86		0.713559	0.46427	0.415033	0.681928	0.199412	0.662551	0.547028	0.340699	0.136139	0.166059	0.557819	0.900781		1.295	1.1322	0.9929	0.8554		100	100	100	86		Lipid	Fatty Acid Metabolism (Acyl Carnitine, Polyunsaturated)	100015831
1911			dihomo-linoleoylcarnitine (C20:2)*	LC/MS pos late	57520					0.57	0.5	0.48	0.88	0.84	0.95		0.0529003	0.0974472	0.00978067	0.461729	0.010142	0.491602	0.555213	0.3429	0.464088	0.346656	0.625138	0.920108		1.7264	0.9891	0.8712	0.8265		100	100	100	86		Lipid	Fatty Acid Metabolism (Acyl Carnitine, Polyunsaturated)	100015839
1912			arachidonoylcarnitine (C20:4)	LC/MS pos late	57518		HMDB0006455	136212424		1.07	0.66	0.79	0.62	0.73	1.19		0.229469	0.249412	0.601336	0.739018	0.871196	0.870411	0.0365197	0.071851	0.11078	0.144603	0.481389	0.866632		1.3057	1.4034	0.8643	1.0281		100	100	100	86		Lipid	Fatty Acid Metabolism (Acyl Carnitine, Polyunsaturated)	100015837
1917			adrenoylcarnitine (C22:4)*	LC/MS pos late	57528					0.89	0.56	0.55	0.63	0.62	0.98		0.541965	0.413708	0.216562	0.579607	0.190252	0.652763	0.00711245	0.0378015	0.0540329	0.101701	0.964896	0.951737		1.3429	1.1953	0.7567	0.7383		58	100	57	57		Lipid	Fatty Acid Metabolism (Acyl Carnitine, Polyunsaturated)	100015850
1918			docosapentaenoylcarnitine (C22:5n3)*	LC/MS pos late	57529			71464594		0.69	0.32	0.41	0.47	0.6	1.29		0.504087	0.397413	0.00359614	0.32773	0.0295791	0.552106	0.00710984	0.0378015	0.097431	0.13734	0.21263	0.743264		1.753	1.2027	0.5632	0.7259		83	86	86	71		Lipid	Fatty Acid Metabolism (Acyl Carnitine, Polyunsaturated)	100015851
1920			docosahexaenoylcarnitine (C22:6)*	LC/MS pos late	57523					1.35	1.05	1.06	0.78	0.78	1		0.335485	0.317591	0.938838	0.793437	0.913538	0.87517	0.477625	0.312981	0.453689	0.342342	0.8622	0.942048		0.897	1.2135	0.9441	0.9476		100	100	100	100		Lipid	Fatty Acid Metabolism (Acyl Carnitine, Polyunsaturated)	100015845
1932		Fatty Acid Metabolism (Acyl Carnitine, Dicarboxylate)	pimeloylcarnitine/3-methyladipoylcarnitine (C7-DC)	LC/MS pos early	53224					0.43	0.48	0.49	1.11	1.15	1.03		0.120207	0.162398	0.213378	0.579607	0.25201	0.682672	0.578158	0.349373	0.393787	0.317651	0.639527	0.920108		1.4499	0.6234	0.6909	0.7138		75	43	57	57		Lipid	Fatty Acid Metabolism (Acyl Carnitine, Dicarboxylate)	100009407
1933			suberoylcarnitine (C8-DC)	LC/MS pos early	52990					0.38	0.39	0.35	1.03	0.92	0.9		0.060531	0.106464	0.0708934	0.551308	0.0335429	0.568401	0.915653	0.457938	0.401602	0.320355	0.333213	0.81569		2.0046	0.7589	0.7787	0.6976		75	71	57	29		Lipid	Fatty Acid Metabolism (Acyl Carnitine, Dicarboxylate)	100006627
1935			octadecanedioylcarnitine (C18-DC)*	LC/MS pos late	61867					0.82	0.78	0.74	0.95	0.9	0.94		0.413435	0.355865	0.274129	0.596776	0.223959	0.674391	0.313221	0.242235	0.275798	0.266542	0.699422	0.920108		1.2075	0.9924	0.9453	0.8908		100	100	100	100		Lipid	Fatty Acid Metabolism (Acyl Carnitine, Dicarboxylate)	100005998	123233-50-1
1936			octadecenedioylcarnitine (C18:1-DC)*	LC/MS pos late	61865					0.4	0.55	0.51	1.39	1.28	0.92		0.0087462	0.0375725	0.101877	0.551308	0.0584597	0.577955	0.248664	0.210806	0.665579	0.420154	0.611857	0.920108		1.6636	0.6605	0.9183	0.8464		92	86	71	86		Lipid	Fatty Acid Metabolism (Acyl Carnitine, Dicarboxylate)	100005996	251981-06-3
1938		Fatty Acid Metabolism (Acyl Carnitine, Hydroxy)	(S)-3-hydroxybutyrylcarnitine	LC/MS pos early	52984		HMDB0013127	71464477		1.24	0.63	0.69	0.51	0.56	1.1		0.189928	0.220985	0.251335	0.592053	0.440791	0.74548	0.00197112	0.0274573	0.0442906	0.0923572	0.57781	0.920108		1.4616	1.8073	0.9235	1.0134		100	100	86	100		Lipid	Fatty Acid Metabolism (Acyl Carnitine, Hydroxy)	100009271
1946			3-hydroxypalmitoylcarnitine	LC/MS pos late	61839		HMDB0013336	126456228		0.71	0.4	0.34	0.57	0.48	0.84		0.739105	0.470152	0.0678785	0.551308	0.0254983	0.537467	0.00624264	0.0373849	0.00276759	0.0408052	0.627734	0.920108		1.6371	1.1631	0.6604	0.5553		92	100	71	86		Lipid	Fatty Acid Metabolism (Acyl Carnitine, Hydroxy)	100019800
1947			3-hydroxyoleoylcarnitine	LC/MS pos late	61840			129637446		0.57	0.32	0.28	0.56	0.49	0.87		0.280945	0.281605	0.010646	0.461729	0.00333915	0.491602	0.00915729	0.04088	0.00671364	0.0449856	0.723634	0.923804		2.383	1.3538	0.7522	0.658		100	100	100	86		Lipid	Fatty Acid Metabolism (Acyl Carnitine, Hydroxy)	100019801
1949		Carnitine Metabolism	deoxycarnitine	LC/MS pos early	36747	C01181	HMDB0001161	22620		0.74	0.51	0.82	0.7	1.12	1.6		0.361564	0.326841	0.0110903	0.461729	0.690986	0.843715	0.00990944	0.0422656	0.644389	0.414093	0.0318902	0.672423		1.5041	1.1077	0.7743	1.2364		100	100	100	100		Lipid	Carnitine Metabolism	100001662	6249-56-5
1950			carnitine	LC/MS pos early	15500	C00487 C00308	HMDB0000062	288		0.74	0.53	0.54	0.72	0.73	1.02		0.170741	0.21015	0.000794954	0.125768	0.0022881	0.491602	0.103875	0.127353	0.0195078	0.0701875	0.97992	0.952937		1.5553	1.1488	0.8229	0.8377		100	100	100	100		Lipid	Carnitine Metabolism	100000007	461-05-2
1956		Ketone Bodies	3-hydroxybutyrate (BHBA)	LC/MS polar	542	C03197 C01089	HMDB0000011 HMDB0000357 HMDB0000442	441;94318;92135		1.54	0.93	0.73	0.6	0.47	0.78		0.0852691	0.130557	0.609517	0.740632	0.798328	0.860642	0.0159134	0.0512646	0.0247339	0.0732182	0.0769728	0.703731		1.1503	1.7754	1.0696	0.8364		100	100	100	100		Lipid	Ketone Bodies	254	625-72-9
1961		Fatty Acid Metabolism (Acyl Choline)	palmitoylcholine	LC/MS pos late	52944		HMDB0240592	151731		0.42	1.27	1.58	3.05	3.81	1.25		0.0370577	0.0832989	0.904849	0.789259	0.721333	0.849177	0.00596353	0.03673	0.0146791	0.0625165	0.426531	0.845053		1.4173	0.5893	1.7958	2.2452		100	100	100	100		Lipid	Fatty Acid Metabolism (Acyl Choline)	100009233
1962			oleoylcholine	LC/MS pos late	53260		HMDB0240596	59040790		0.42	1.22	1.44	2.91	3.44	1.18		0.0264633	0.069401	0.778063	0.778124	0.992691	0.887182	0.0127258	0.0464947	0.0126513	0.060551	0.632522	0.920108		1.4357	0.6015	1.7478	2.0678		100	100	100	100		Lipid	Fatty Acid Metabolism (Acyl Choline)	100009331
1965			dihomo-linolenoyl-choline	LC/MS pos late	53262		HMDB0240646			0.78	1.61	1.84	2.06	2.36	1.15		0.255943	0.265777	0.758125	0.778124	0.791976	0.860642	0.0996056	0.123742	0.0972552	0.13734	0.998212	0.954738		0.9914	0.775	1.5945	1.8287		83	57	71	71		Lipid	Fatty Acid Metabolism (Acyl Choline)	100009335
1966			linoleoylcholine*	LC/MS pos late	57463		HMDB0013213	53481656		0.45	1.39	1.63	3.09	3.62	1.17		0.0539885	0.0980026	0.838071	0.785893	0.923581	0.87517	0.0200618	0.0551244	0.0266217	0.0737224	0.623911	0.920108		1.5991	0.72	2.2264	2.6083		100	100	100	100		Lipid	Fatty Acid Metabolism (Acyl Choline)	100015760
1968			stearoylcholine*	LC/MS pos late	57464		HMDB0240648	90111		0.69	1.37	1.76	2	2.56	1.28		0.291119	0.287439	0.971903	0.800846	0.59509	0.802324	0.0944634	0.12098	0.0662089	0.113377	0.338928	0.81569		1.2543	0.8598	1.7202	2.2042		100	100	100	100		Lipid	Fatty Acid Metabolism (Acyl Choline)	100015759
1969			docosahexaenoylcholine	LC/MS pos late	53263		HMDB0240647			0.86	0.89	1.32	1.03	1.53	1.49		0.88621	0.514993	0.785471	0.778124	0.758377	0.854631	0.760365	0.412996	0.617093	0.408588	0.376391	0.819254		1.3115	1.134	1.1624	1.7308		100	100	100	100		Lipid	Fatty Acid Metabolism (Acyl Choline)	100009333
1970			arachidonoylcholine	LC/MS pos late	53261		HMDB0240583	122198216		0.89	1.62	1.99	1.82	2.24	1.23		0.770155	0.477494	0.687277	0.765722	0.345606	0.72078	0.18888	0.18229	0.1234	0.155035	0.354295	0.81569		1.0884	0.9695	1.7672	2.1684		100	100	100	100		Lipid	Fatty Acid Metabolism (Acyl Choline)	100009332
1971			eicosapentaenoylcholine	LC/MS pos late	53258					0.28	0.8	1.28	2.85	4.53	1.59		0.0160047	0.0535337	0.510626	0.720287	0.856313	0.868761	0.055698	0.0897148	0.0473772	0.0963938	0.211206	0.743264		1.7379	0.4902	1.3959	2.2198		92	57	71	100		Lipid	Fatty Acid Metabolism (Acyl Choline)	100009336
1976		Fatty Acid, Monohydroxy	alpha-hydroxycaproate	LC/MS neg	37073		HMDB0001624	99824		0.87	1.41	1.72	1.62	1.98	1.22		0.591877	0.42932	0.294437	0.618352	0.323994	0.72078	0.0966066	0.121963	0.276489	0.266696	0.810383	0.935671		0.8875	0.7714	1.251	1.5295		83	86	86	86		Lipid	Fatty Acid, Monohydroxy	100001723	6064-63-7
1977			2-hydroxyheptanoate*	LC/MS polar	61827			2750949		0.42	0.92	0.9	2.21	2.15	0.97		0.00778563	0.0353392	0.826089	0.785893	0.720225	0.849177	0.0158263	0.0512646	0.00777732	0.0469288	0.857119	0.942048		1.0868	0.4533	1.0033	0.9751		100	100	100	100		Lipid	Fatty Acid, Monohydroxy	100019960
1978			2-hydroxyoctanoate	LC/MS neg	22036		HMDB0002264	5312860;6995013;94180		0.89	1.1	1.02	1.24	1.15	0.93		0.538958	0.412303	0.994225	0.809126	0.750845	0.854631	0.355852	0.262644	0.887575	0.486284	0.641593	0.920108		1.15	1.0186	1.267	1.1752		100	100	100	100		Lipid	Fatty Acid, Monohydroxy	100000743	617-73-2
1980			2-hydroxydecanoate	LC/MS neg	42489		HMDB0094656	21488		1.31	1.41	1.12	1.08	0.85	0.79		0.593491	0.42939	0.416119	0.681928	0.999872	0.888089	0.497229	0.321248	0.435055	0.334175	0.114048	0.711613		0.9246	1.2127	1.3051	1.0351		100	100	100	100		Lipid	Fatty Acid, Monohydroxy	100004089	5393-81-7
1985			2-hydroxymyristate	LC/MS neg	32413	C13790	HMDB0002261	1563		0.59	0.68	0.83	1.16	1.42	1.22		0.0344698	0.079541	0.185785	0.579607	0.543883	0.778204	0.544229	0.340008	0.11616	0.148162	0.27297	0.790967		1.4353	0.845	0.9786	1.1963		100	100	100	100		Lipid	Fatty Acid, Monohydroxy	100001180	2507-55-3
1986			2-hydroxypalmitate	LC/MS neg	35675		HMDB0031057	12575964;92836;11065598		0.66	0.95	0.91	1.43	1.38	0.96		0.00482396	0.0254819	0.729304	0.773858	0.557318	0.784094	0.0410052	0.0745294	0.201014	0.215853	0.625507	0.920108		1.2509	0.8291	1.1865	1.1445		100	100	100	100		Lipid	Fatty Acid, Monohydroxy	100001579	764-67-0
1989			2-hydroxystearate	LC/MS neg	17945	C03045 C03042	HMDB0062549	69417;439885;439887		0.89	1.16	1.07	1.31	1.2	0.92		0.668757	0.451055	0.50195	0.718015	0.802745	0.862872	0.251273	0.212248	0.59538	0.398942	0.44428	0.852161		0.9972	0.8839	1.1536	1.0649		100	100	100	100		Lipid	Fatty Acid, Monohydroxy	1239	629-22-1
1991			2-hydroxyarachidate*	LC/MS neg	61700			5225199		0.78	1.12	0.96	1.44	1.23	0.86		0.504249	0.397413	0.414424	0.681928	0.753047	0.854631	0.215725	0.195666	0.825354	0.476758	0.434633	0.846183		1.0007	0.7818	1.1234	0.9637		92	86	100	86		Lipid	Fatty Acid, Monohydroxy	100019892
1992			2-hydroxybehenate	LC/MS neg	57663		HMDB0061660	193484		1.26	1.49	1.19	1.19	0.95	0.8		0.136697	0.178886	0.0102647	0.461729	0.41709	0.744374	0.0915408	0.119896	0.622772	0.408626	0.0869402	0.703731		0.9042	1.1376	1.349	1.0757		100	100	100	100		Lipid	Fatty Acid, Monohydroxy	100015637
1994			2-hydroxynervonate*	LC/MS neg	61698			5312783		1.58	1.53	1.29	0.97	0.81	0.84		0.0187837	0.056058	0.0522065	0.551308	0.0819758	0.577955	0.58625	0.352439	0.330057	0.289981	0.493358	0.869177		0.7938	1.2541	1.2126	1.0201		92	100	100	100		Lipid	Fatty Acid, Monohydroxy	100015638
1997			3-hydroxyhexanoate	LC/MS neg	53230		HMDB0061652 HMDB0010718	151492		1	0.7	0.47	0.69	0.47	0.68		0.935991	0.528054	0.224604	0.579607	0.0107015	0.491602	0.305545	0.239174	0.0385829	0.0854173	0.070226	0.703731		1.2793	1.2835	0.8897	0.6007		100	100	86	86		Lipid	Fatty Acid, Monohydroxy	100006367	10191-24-9
1998			3-hydroxyoctanoate	LC/MS neg	22001	C20793	HMDB0001954	26613		0.61	0.45	0.36	0.74	0.59	0.8		0.287148	0.285117	0.0768014	0.551308	0.0218114	0.498969	0.395397	0.277737	0.0948684	0.135829	0.176584	0.734339		1.9187	1.1691	0.8653	0.6912		100	100	86	86		Lipid	Fatty Acid, Monohydroxy	100000773	88930-08-9
2000			3-hydroxydecanoate	LC/MS neg	22053		HMDB0002203	26612		0.76	0.51	0.53	0.68	0.71	1.05		0.777813	0.479988	0.133219	0.551308	0.156417	0.648226	0.036609	0.071851	0.0884952	0.130063	0.843308	0.94052		1.4998	1.1338	0.7665	0.8011		100	100	100	100		Lipid	Fatty Acid, Monohydroxy	100000997	5561-87-5
2003			3-hydroxylaurate	LC/MS neg	32457		HMDB0000387	94216		1.01	0.52	0.44	0.52	0.44	0.84		0.497104	0.394871	0.155007	0.568634	0.0552437	0.577955	0.0400027	0.0744839	0.00784408	0.0469288	0.0925717	0.703731		1.4892	1.4987	0.7756	0.6534		100	100	100	86		Lipid	Fatty Acid, Monohydroxy	100001112	53941-38-1
2004			3-hydroxymyristate	LC/MS neg	21158		HMDB0061656	16064		1.39	0.71	0.71	0.52	0.51	0.99		0.0722612	0.119285	0.514093	0.720287	0.433308	0.744947	0.02037	0.0553202	0.0324051	0.0795055	0.665676	0.920108		1.1603	1.6082	0.8295	0.8187		83	100	100	71		Lipid	Fatty Acid, Monohydroxy	100000882	3422-31-9
2009			3-hydroxyarachidate*	LC/MS neg	61701		HMDB0062566	5282918		1.02	1.18	0.78	1.15	0.76	0.66		0.746028	0.470961	0.386517	0.67121	0.32288	0.72078	0.630025	0.372052	0.0780904	0.121499	0.0392291	0.672423		0.8197	0.8366	0.9652	0.6372		50	57	86	29		Lipid	Fatty Acid, Monohydroxy	100019893
2013			5-hydroxyhexanoate	LC/MS neg	31938		HMDB0000525 HMDB0000409	170748		0.84	1	0.74	1.19	0.88	0.74		0.736055	0.46986	0.999655	0.811963	0.404738	0.744374	0.818983	0.428876	0.67959	0.424256	0.330103	0.81569		0.9803	0.824	0.9836	0.7281		83	71	57	57		Lipid	Fatty Acid, Monohydroxy	100001148	44843-89-2
2019			8-hydroxyoctanoate	LC/MS neg	21239		HMDB0061914	69820		0.94	0.62	0.65	0.66	0.7	1.05		0.996844	0.542297	0.510929	0.720287	0.478779	0.755964	0.640525	0.373997	0.530059	0.375712	0.90447	0.942048		0.9861	0.9249	0.6126	0.6438		58	43	57	43		Lipid	Fatty Acid, Monohydroxy	100000956	764-89-6
2032			13-HODE + 9-HODE	LC/MS neg	37752	C14767 C14762	HMDB0004667 HMDB0004670	5312830;1424;5282947;5282944;5282945		0.93	1.39	1.72	1.49	1.85	1.24		0.37386	0.332957	0.608822	0.740632	0.58974	0.801364	0.191752	0.183572	0.208386	0.219935	0.885006	0.942048		1.229	1.1454	1.7088	2.1178		100	100	100	100		Lipid	Fatty Acid, Monohydroxy	100002196
2043			hydroxystearate sulfate	LC/MS neg	57392					2.14	1.65	0.91	0.77	0.43	0.55		0.188415	0.220985	0.309723	0.620283	0.942622	0.87693	0.555921	0.3429	0.0477623	0.0965793	0.207448	0.743264		0.6268	1.3429	1.0365	0.5709		42	57	43	43		Lipid	Fatty Acid, Monohydroxy	100015656
2048		Fatty Acid, Dihydroxy	12,13-DiHOME	LC/MS neg	38395	C14829	HMDB0004705	10236635		0.74	1.2	1.24	1.63	1.67	1.03		0.347898	0.323435	0.706287	0.768423	0.79817	0.860642	0.226748	0.199844	0.310273	0.281965	0.863202	0.942048		1.2163	0.8998	1.4643	1.505		92	100	100	100		Lipid	Fatty Acid, Dihydroxy	62	263399-35-5
2049			9,10-DiHOME	LC/MS neg	38399	C14828	HMDB0004704	9966640		0.6	0.92	0.88	1.54	1.47	0.95		0.0529447	0.0974472	0.682694	0.762765	0.590669	0.801364	0.27438	0.2253	0.296231	0.27391	0.88561	0.942048		1.3877	0.8323	1.2798	1.2196		100	86	100	100		Lipid	Fatty Acid, Dihydroxy	179	263399-34-4
2051			2S,3R-dihydroxybutyrate	LC/MS polar	62950		HMDB0002453	10964471		0.97	0.94	0.7	0.97	0.72	0.74		0.929666	0.52532	0.630179	0.743608	0.0990457	0.607074	0.527428	0.333696	0.0361307	0.0821601	0.0123378	0.672423		1.1318	1.1	1.0691	0.7869		100	100	100	100		Lipid	Fatty Acid, Dihydroxy	100002284	5057-93-2
2052			2R,3R-dihydroxybutyrate	LC/MS polar	63109		HMDB0000498	13120901		0.47	0.76	0.66	1.61	1.41	0.87		0.00847601	0.0375725	0.604986	0.739766	0.251452	0.682672	0.00641071	0.0374316	0.0691146	0.115011	0.183683	0.734339		1.4902	0.6976	1.1254	0.9834		100	100	100	100		Lipid	Fatty Acid, Dihydroxy	100002367	759-06-8
2055			3,4-dihydroxybutyrate	LC/MS polar	62952		HMDB0000337	150929		1.23	1.13	1.15	0.92	0.93	1.02		0.187787	0.220927	0.495964	0.716481	0.612217	0.80654	0.338227	0.258154	0.466303	0.346656	0.823993	0.936955		0.9731	1.1961	1.0993	1.1176		100	100	100	100		Lipid	Fatty Acid, Dihydroxy	100001730	51267-44-8
2098		Eicosanoid	thromboxane B2	LC/MS neg	17807	C05963	HMDB0003252	5283137		0.74	0.32	1.52	0.44	2.04	4.68		0.657491	0.449602	0.121049	0.551308	0.697963	0.843715	0.000397282	0.0185576	0.85258	0.482502	0.0287392	0.672423		1.5513	1.1522	0.5031	2.3559		75	100	43	86		Lipid	Eicosanoid	1308	54397-85-2
2159			12-HETE	LC/MS neg	37536	C14777	HMDB0006111	5283155		1.1	0.46	2.88	0.41	2.62	6.32		0.0639073	0.109962	0.633588	0.743608	0.452531	0.752029	0.00924296	0.04088	0.784062	0.463042	0.221346	0.743624		1.6685	1.8337	0.7595	4.8028		100	100	100	100		Lipid	Eicosanoid	100002167	71030-37-0;73837-14-6
2166			12-HHTrE	LC/MS neg	57393	C20388	HMDB0012535	5283141		0.86	0.44	1.48	0.51	1.72	3.37		0.569649	0.422203	0.253943	0.593264	0.963715	0.882192	0.00995307	0.0422656	0.593348	0.398585	0.410428	0.835351		1.7101	1.4733	0.7501	2.5284		100	100	100	100		Lipid	Eicosanoid	1261	54397-84-1
2177		Endocannabinoid	oleoyl ethanolamide	LC/MS neg	38102		HMDB0002088	5283454		0.52	0.68	0.7	1.32	1.36	1.03		0.0042995	0.0239909	0.052375	0.551308	0.09115	0.577955	0.119574	0.137264	0.183653	0.201678	0.901629	0.942048		1.4177	0.7326	0.9668	0.9976		100	100	100	100		Lipid	Endocannabinoid	1137	11-58-0;111-58-0
2180			palmitoyl ethanolamide	LC/MS neg	38165	C16512	HMDB0002100	4671		1.28	1.56	1.09	1.22	0.85	0.7		0.549392	0.417068	0.35722	0.654109	0.418174	0.744374	0.292963	0.233205	0.855014	0.483335	0.538855	0.891693		1.0158	1.2994	1.5897	1.1063		100	100	100	100		Lipid	Endocannabinoid	1489	544-31-0
2188			N-myristoyltaurine*	LC/MS neg	61825			3810823		0.97	1.13	0.91	1.16	0.93	0.8		0.978002	0.536357	0.257222	0.59495	0.740645	0.854631	0.341238	0.259362	0.792351	0.464637	0.204629	0.743264		0.9963	0.9712	1.1261	0.9061		100	100	100	100		Lipid	Endocannabinoid	100005829
2189			N-arachidonoyltaurine	LC/MS neg	54748			42607331		1.28	1.8	1.6	1.4	1.25	0.89		0.0650211	0.110795	0.0154895	0.4917	0.220701	0.669244	0.114639	0.135183	0.936961	0.50114	0.117544	0.711613		0.7978	1.0235	1.4344	1.2801		75	100	100	100		Lipid	Endocannabinoid	100005817	119959-65-8
2190			N-oleoyltaurine	LC/MS neg	39732			6437033		0.85	0.77	0.59	0.91	0.7	0.77		0.601621	0.432697	0.478292	0.716434	0.0757988	0.577955	0.918835	0.459038	0.351479	0.299534	0.109514	0.703731		1.3327	1.1357	1.0323	0.791		100	100	100	100		Lipid	Endocannabinoid	100003119	52514-04-2
2191			N-stearoyltaurine	LC/MS neg	39730			168274		0.94	0.83	0.89	0.88	0.94	1.06		0.752012	0.474034	0.486959	0.716481	0.664553	0.829943	0.230184	0.201352	0.351398	0.299534	0.551402	0.895819		1.188	1.12	0.9899	1.0541		100	100	100	100		Lipid	Endocannabinoid	100003240	63155-80-6
2192			N-palmitoyltaurine	LC/MS neg	39835			14504290		1.16	1.15	0.93	0.99	0.81	0.81		0.283197	0.282255	0.252228	0.592053	0.820836	0.868761	0.985097	0.477832	0.300674	0.275233	0.16212	0.734339		0.8654	1.0014	0.9931	0.8065		83	100	100	86		Lipid	Endocannabinoid	100003239	83982-06-3
2194			N-palmitoleoyltaurine*	LC/MS neg	61824					0.67	0.77	0.61	1.15	0.91	0.79		0.257396	0.266079	0.651339	0.750909	0.174489	0.648226	0.159493	0.163109	0.987823	0.515501	0.0432953	0.672423		1.338	0.8922	1.0287	0.816		100	100	100	100		Lipid	Endocannabinoid	100005831
2195			N-linoleoyltaurine*	LC/MS neg	61826			52922081		0.74	0.99	0.74	1.33	1	0.75		0.234197	0.251447	0.773158	0.778124	0.240002	0.682672	0.0491202	0.0831329	0.999777	0.518509	0.0742748	0.703731		1.3142	0.9731	1.2975	0.9737		100	100	100	100		Lipid	Endocannabinoid	100005814
2196			N-linolenoyltaurine*	LC/MS neg	46224					1.02	2.5	1.56	2.46	1.53	0.62		0.97182	0.534765	0.138853	0.551308	0.576861	0.794827	0.138828	0.151869	0.517882	0.37127	0.265866	0.782573		0.6465	0.6584	1.6167	1.0054		58	57	86	71		Lipid	Endocannabinoid	100005815
2197			azeloyltaurine	LC/MS neg	63226					0.31	0.42	0.21	1.37	0.67	0.49		0.118547	0.160567	0.343585	0.644049	0.0159244	0.491602	0.390783	0.276157	0.044074	0.0923572	0.0825885	0.703731		2.6831	0.8258	1.1315	0.5507		83	86	71	29		Lipid	Endocannabinoid	100021233
2198			hexanoyltaurine	LC/MS neg	63224			2245940		0.78	0.7	0.63	0.89	0.8	0.89		0.929364	0.52532	0.433823	0.689832	0.265976	0.683971	0.205347	0.189781	0.104812	0.140837	0.404912	0.829571		1.4156	1.1092	0.9906	0.8854		100	100	100	100		Lipid	Endocannabinoid	100021223
2200			linoleoyl ethanolamide	LC/MS neg	52608		HMDB0012252	5283446		0.71	0.84	1.06	1.19	1.5	1.26		0.224064	0.245558	0.722044	0.773858	0.916162	0.87517	0.275172	0.2253	0.400564	0.320355	0.733437	0.923804		1.2367	0.8733	1.0349	1.3076		92	100	100	100		Lipid	Endocannabinoid	100006726	68171-52-8
2214			N-oleoylserine	LC/MS neg	57664			44190514		0.58	0.81	0.84	1.39	1.45	1.04		0.00327174	0.0201514	0.238882	0.583867	0.29521	0.705044	0.0861925	0.115363	0.0928288	0.133821	0.980254	0.952937		1.3711	0.7977	1.108	1.1539		100	86	100	100		Lipid	Endocannabinoid	100015641
2215			N-stearoylserine*	LC/MS neg	61822					0.6	0.73	0.72	1.22	1.2	0.98		0.047151	0.0929363	0.211967	0.579607	0.194016	0.656492	0.654417	0.379244	0.659749	0.41863	0.908561	0.942048		1.4538	0.8725	1.067	1.0451		100	100	100	100		Lipid	Endocannabinoid	100019957
2216			N-palmitoylserine	LC/MS neg	57659			6453686		0.45	0.77	0.76	1.71	1.69	0.99		0.171068	0.21015	0.72709	0.773858	0.643195	0.821068	0.294057	0.233205	0.28811	0.272624	0.867422	0.942048		0.963	0.4331	0.7391	0.7298		58	57	57	57		Lipid	Endocannabinoid	100015640	58725-46-5;474943-14-1
2219		Inositol Metabolism	myo-inositol	LC/MS polar	1124	C00137	HMDB0000211	892		1.17	1.06	1.17	0.9	1	1.11		0.179827	0.216875	0.437936	0.692848	0.235224	0.682672	0.447849	0.299279	0.873438	0.485021	0.459966	0.86083		0.9307	1.093	0.9856	1.0923		100	100	100	100		Lipid	Inositol Metabolism	363	87-89-8
2250		Phospholipid Metabolism	choline	LC/MS pos early	15506	C00114	HMDB0000097	305		1.35	1.1	1.45	0.81	1.07	1.32		0.0187187	0.056058	0.523345	0.722489	0.0363831	0.577955	0.159304	0.163109	0.831826	0.478819	0.076806	0.703731		0.931	1.2567	1.0236	1.3462		100	100	100	100		Lipid	Phospholipid Metabolism	1256	67-48-1
2251			choline phosphate	LC/MS pos early	34396	C00588	HMDB0001565	1014		0.86	0.79	0.98	0.92	1.14	1.24		0.469449	0.383277	0.173405	0.579607	0.970965	0.882192	0.702002	0.394602	0.471312	0.349862	0.260146	0.782573		1.2082	1.0406	0.953	1.1856		100	100	100	100		Lipid	Phospholipid Metabolism	267	72556-74-2
2254			glycerophosphorylcholine (GPC)	LC/MS pos early	15990	C00670	HMDB0000086	71920		0.75	1.27	1.45	1.71	1.94	1.14		0.0765469	0.12216	0.0662528	0.551308	0.0515808	0.577955	0.0337542	0.0694583	0.022566	0.0731643	0.357127	0.815898		0.9602	0.7155	1.2224	1.3876		100	100	100	100		Lipid	Phospholipid Metabolism	100000269	28319-77-9
2256			phosphoethanolamine	LC/MS neg	1600	C00346	HMDB0000224	1015		0.55	0.74	1.35	1.34	2.43	1.81		0.0712145	0.117925	0.309258	0.620283	0.57712	0.794827	0.170574	0.170615	0.0613527	0.109106	0.295732	0.795136		1.2396	0.6878	0.9203	1.6696		100	100	100	100		Lipid	Phospholipid Metabolism	1026	1071-23-4
2258			glycerophosphoethanolamine	LC/MS polar	37455	C01233	HMDB0000114	123874		0.52	0.88	1.02	1.68	1.96	1.16		0.00182833	0.0137374	0.622713	0.742984	0.92591	0.87517	0.00384112	0.0358894	0.0288833	0.0763958	0.619211	0.920108		1.3388	0.6998	1.1773	1.3691		100	100	100	100		Lipid	Phospholipid Metabolism	100001620	33049-08-0
2259			glycerophosphoserine*	LC/MS pos early	57404			3081457		1.16	0.91	1.98	0.79	1.71	2.17		0.113619	0.156297	0.885448	0.786109	0.122533	0.638125	0.0645225	0.0981041	0.376681	0.310163	0.118786	0.711613		0.967	1.1207	0.8841	1.9141		100	100	100	100		Lipid	Phospholipid Metabolism	100015666
2260			glycerophosphoinositol*	LC/MS polar	47155			167572		0.71	1.07	1.15	1.51	1.62	1.07		0.0117405	0.044617	0.919746	0.790341	0.449226	0.748843	0.0765574	0.108367	0.00420477	0.0408052	0.470022	0.866632		1.1348	0.8035	1.2173	1.3006		100	100	100	100		Lipid	Phospholipid Metabolism	100001621	16824-65-0
2261			trimethylamine N-oxide	LC/MS pos early	40406	C01104	HMDB0000925	1145		0.95	1.3	1.49	1.36	1.56	1.14		0.639757	0.444495	0.39289	0.672368	0.633076	0.815377	0.490606	0.319176	0.881186	0.486284	0.631458	0.920108		1.127	1.0759	1.4669	1.6755		100	100	100	100		Lipid	Phospholipid Metabolism	100003397	1184-78-7
2280		Phosphatidylcholine (PC)	1-myristoyl-2-palmitoyl-GPC (14:0/16:0)	LC/MS pos late	19258		HMDB0007869	129657		0.55	0.89	0.8	1.61	1.45	0.9		0.000460124	0.00784047	0.416564	0.681928	0.217409	0.666275	0.144806	0.155446	0.0250594	0.0732182	0.981386	0.952937		1.2501	0.6893	1.1095	0.9976		92	43	71	86		Lipid	Phosphatidylcholine (PC)	100000672	69525-80-0
2284			1-myristoyl-2-arachidonoyl-GPC (14:0/20:4)*	LC/MS pos late	53195		HMDB0007883	24778634		0.41	1.08	0.92	2.68	2.27	0.85		0.00232125	0.0161338	0.557107	0.726638	0.850843	0.868761	0.0016391	0.0274573	0.00398843	0.0408052	0.43494	0.846183		1.2195	0.4943	1.3225	1.1209		100	100	100	100		Lipid	Phosphatidylcholine (PC)	100009139
2289			1-pentadecanoyl-2-linoleoyl-GPC (15:0/18:2)*	LC/MS pos late	52497		HMDB0007940	24778664		0.4	0.74	0.72	1.86	1.81	0.98		9.47323e-05	0.00344547	0.0839692	0.551308	0.07635	0.577955	0.00235523	0.027883	0.00324076	0.0408052	0.524066	0.884446		1.5024	0.598	1.1102	1.0832		100	100	100	100		Lipid	Phosphatidylcholine (PC)	100009035
2290			1-pentadecanoyl-2-arachidonoyl-GPC (15:0/20:4)*	LC/MS pos late	53194		HMDB0007949	52922330		0.67	1.27	1.21	1.89	1.81	0.96		0.0451492	0.0899982	0.251489	0.592053	0.132762	0.638125	0.026307	0.0605338	0.0101326	0.0553493	0.986953	0.953784		1.0644	0.7139	1.35	1.2926		100	100	100	100		Lipid	Phosphatidylcholine (PC)	100009122
2291			1-pentadecanoyl-2-docosahexaenoyl-GPC (15:0/22:6)*	LC/MS pos late	53197		HMDB0007958	52922342		0.81	0.94	1.03	1.17	1.28	1.09		0.449143	0.375353	0.870474	0.785893	0.83471	0.868761	0.498896	0.32188	0.695554	0.432023	0.846765	0.940991		1.0609	0.8545	1.0012	1.095		100	100	100	100		Lipid	Phosphatidylcholine (PC)	100009123
2295			1-palmitoyl-2-pentadecanoyl-GPC (16:0/15:0)*	LC/MS pos late	57757		HMDB0007967	24778680		0.38	0.86	0.69	2.25	1.81	0.8		0.000181798	0.004708	0.382767	0.669874	0.0185867	0.491602	0.00861824	0.0398584	0.0228869	0.0732182	0.206092	0.743264		1.3479	0.5139	1.1586	0.9304		100	57	100	100		Lipid	Phosphatidylcholine (PC)	100016019
2296			1,2-dipalmitoyl-GPC (16:0/16:0)	LC/MS pos late	19130	D03585	HMDB0000564	452110		0.59	0.91	0.89	1.53	1.5	0.98		0.00123733	0.0112261	0.619267	0.742984	0.530995	0.778204	0.00828814	0.0391061	0.00618354	0.0449856	0.904503	0.942048		1.2399	0.7367	1.1268	1.1052		100	100	100	100		Lipid	Phosphatidylcholine (PC)	100000657	63-89-8
2297			1-palmitoyl-2-palmitoleoyl-GPC (16:0/16:1)*	LC/MS pos late	52470		HMDB0007969	6443788		0.46	0.85	0.75	1.83	1.61	0.88		0.000834143	0.0100696	0.460535	0.706009	0.140372	0.638125	0.00295024	0.0306243	0.00425801	0.0408052	0.36304	0.819254		1.345	0.6238	1.1389	1.0068		100	100	100	100		Lipid	Phosphatidylcholine (PC)	100008984
2299			1-palmitoyl-2-stearoyl-GPC (16:0/18:0)	LC/MS pos late	52616	C03889	HMDB0007970	24778686		0.53	0.99	1.02	1.86	1.9	1.02		0.0183955	0.056058	0.792501	0.778124	0.624146	0.811838	0.0296303	0.0646762	0.00584485	0.0449856	0.828457	0.938045		1.2368	0.6604	1.228	1.2563		100	100	100	100		Lipid	Phosphatidylcholine (PC)	100008921	59403-51-9
2301			1-palmitoyl-2-oleoyl-GPC (16:0/18:1)	LC/MS pos late	52461	C13875	HMDB0007972	6436017		0.61	0.8	0.77	1.32	1.26	0.96		2.76569e-06	0.00048698	0.0266708	0.519117	0.0114542	0.491602	0.00141546	0.0274573	0.00152903	0.0408052	0.450826	0.855403		1.2127	0.74	0.9752	0.9349		100	100	100	100		Lipid	Phosphatidylcholine (PC)	1539	26853-31-6;26853-31-6
2304			1-palmitoyl-2-linoleoyl-GPC (16:0/18:2)	LC/MS pos late	42446		HMDB0007973	5287971		0.61	0.85	0.84	1.38	1.37	0.99		0.0015587	0.0124476	0.233999	0.579607	0.257891	0.682672	0.0109511	0.0442727	0.0107798	0.0556562	0.687027	0.920108		1.2168	0.7483	1.0337	1.0227		100	100	100	100		Lipid	Phosphatidylcholine (PC)	1537	40811-94-7
2315			1-palmitoyl-2-arachidonoyl-GPC (16:0/20:4n6)	LC/MS pos late	52462	C05208	HMDB0007982	10747814		0.85	1.09	1.05	1.3	1.24	0.96		0.432399	0.367809	0.522085	0.722489	0.539376	0.778204	0.202147	0.188099	0.110052	0.144199	0.84253	0.94052		1.1007	0.9304	1.2052	1.1582		100	100	100	100		Lipid	Phosphatidylcholine (PC)	100008914	35418-58-7
2316			1-palmitoyl-2-eicosapentaenoyl-GPC (16:0/20:5)*	LC/MS pos late	52463		HMDB0007984	24778723		0.3	0.68	0.68	2.23	2.23	1		0.00310451	0.0195397	0.422276	0.681928	0.399322	0.744374	0.00193928	0.0274573	0.0111517	0.0556562	0.957929	0.950247		2.0094	0.6115	1.3655	1.365		100	100	100	100		Lipid	Phosphatidylcholine (PC)	100008989
2321			1-palmitoyl-2-docosahexaenoyl-GPC (16:0/22:6)	LC/MS pos late	52610		HMDB0007991	6441886		1.11	0.81	0.85	0.73	0.77	1.05		0.442795	0.373048	0.526996	0.724999	0.584457	0.799325	0.0984715	0.123649	0.106528	0.141219	0.996303	0.954738		1.045	1.1589	0.8475	0.8906		100	100	100	100		Lipid	Phosphatidylcholine (PC)	100008915	59403-54-2
2327			1-palmitoleoyl-2-linoleoyl-GPC (16:1/18:2)*	LC/MS pos late	52683		HMDB0008006	24778768		0.45	0.87	0.85	1.92	1.88	0.98		0.0233881	0.0633561	0.714424	0.770992	0.534023	0.778204	0.00796246	0.0387435	3.03146e-05	0.00761725	0.51616	0.876851		1.4181	0.6433	1.2327	1.2124		100	100	100	100		Lipid	Phosphatidylcholine (PC)	100009075
2328			1-palmitoleoyl-2-linolenoyl-GPC (16:1/18:3)*	LC/MS pos late	53180		HMDB0008008	52922452		0.41	1.06	0.96	2.55	2.31	0.91		0.030736	0.0744767	0.799231	0.780057	0.723671	0.849177	0.01692	0.0523415	0.0353764	0.0815518	0.355938	0.81569		1.3102	0.5429	1.3833	1.2561		100	86	100	86		Lipid	Phosphatidylcholine (PC)	100009345
2334			1-margaroyl-2-oleoyl-GPC (17:0/18:1)*	LC/MS pos late	52499					0.56	0.88	0.72	1.59	1.3	0.82		0.000363075	0.00661344	0.468332	0.711273	0.0614465	0.577955	0.0498272	0.0840252	0.072768	0.117988	0.0566101	0.703731		1.4725	0.8194	1.3008	1.0628		100	100	100	100		Lipid	Phosphatidylcholine (PC)	100009036
2335			1-margaroyl-2-linoleoyl-GPC (17:0/18:2)*	LC/MS pos late	52500			52922491		0.51	0.86	0.76	1.7	1.5	0.88		0.00144155	0.0118981	0.375901	0.669085	0.114793	0.638125	0.0226737	0.0575609	0.0208529	0.0720218	0.263778	0.782573		1.3619	0.6883	1.1691	1.03		100	100	100	100		Lipid	Phosphatidylcholine (PC)	100009037
2336			1-margaroyl-2-arachidonoyl-GPC (17:0/20:4)*	LC/MS pos late	53193					1.2	1.23	1.22	1.02	1.01	0.99		0.0802901	0.126604	0.205712	0.579607	0.215432	0.666275	0.842684	0.435983	0.765155	0.456682	0.916306	0.942048		0.8754	1.0529	1.0772	1.0681		100	100	100	100		Lipid	Phosphatidylcholine (PC)	100009124
2340			1-stearoyl-2-oleoyl-GPC (18:0/18:1)	LC/MS pos late	52438		HMDB0008038	24778825		0.81	0.84	0.78	1.04	0.97	0.93		0.00926399	0.038838	0.100848	0.551308	0.0182997	0.491602	0.638112	0.373931	0.528144	0.374883	0.35849	0.815898		1.169	0.9431	0.984	0.9166		100	100	100	100		Lipid	Phosphatidylcholine (PC)	100008904	56421-10-4
2343			1-stearoyl-2-linoleoyl-GPC (18:0/18:2)*	LC/MS pos late	52452		HMDB0008039	6441487		0.8	0.89	0.87	1.12	1.08	0.97		0.0320903	0.0761977	0.311633	0.620283	0.231051	0.682672	0.30485	0.239174	0.446556	0.338996	0.684555	0.920108		1.1002	0.8791	0.9812	0.9538		100	100	100	100		Lipid	Phosphatidylcholine (PC)	100008980
2346			phosphatidylcholine (18:0/20:2, 20:0/18:2)*	LC/MS pos late	53192		HMDB0008045 HMDB0008143			0.51	0.7	0.76	1.39	1.51	1.08		0.000439163	0.00773275	0.0803666	0.551308	0.208446	0.662551	0.0207959	0.0555515	0.033085	0.0796445	0.660789	0.920108		1.477	0.7478	1.0412	1.1262		100	100	100	100		Lipid	Phosphatidylcholine (PC)	100009364
2347			1-stearoyl-2-dihomo-linolenoyl-GPC (18:0/20:3n3 or 6)*	LC/MS pos late	52629		HMDB0008047			1.15	0.94	0.87	0.82	0.76	0.92		0.201623	0.230529	0.653824	0.750909	0.288585	0.697616	0.0403519	0.0744839	0.00759524	0.0469288	0.611374	0.920108		1.0013	1.148	0.9408	0.8702		100	100	100	100		Lipid	Phosphatidylcholine (PC)	100009051
2348			1-stearoyl-2-meadoyl-GPC (18:0/20:3n9)*	LC/MS pos late	52738		HMDB0008046	24778855		1.11	1.14	1.11	1.02	0.99	0.97		0.591667	0.42932	0.620768	0.742984	0.547008	0.781269	0.995959	0.47912	0.933989	0.501053	0.914177	0.942048		0.8251	0.9196	0.9382	0.9143		58	71	71	86		Lipid	Phosphatidylcholine (PC)	100009153
2351			1-stearoyl-2-arachidonoyl-GPC (18:0/20:4)	LC/MS pos late	42450		HMDB0008048	16219824		1.24	1.09	1.08	0.88	0.87	0.99		0.0199625	0.0579392	0.56456	0.726638	0.500232	0.760651	0.217367	0.196213	0.142851	0.172659	0.945417	0.94919		0.8868	1.0996	0.971	0.9606		100	100	100	100		Lipid	Phosphatidylcholine (PC)	100001869	35418-59-8
2354			1-stearoyl-2-adrenoyl-GPC (18:0/22:4)*	LC/MS pos late	55061		HMDB0008054	24778868		1.33	1.13	0.94	0.85	0.7	0.83		0.0537634	0.0980026	0.274508	0.596776	0.812366	0.86653	0.0539305	0.0890164	0.0173501	0.0663066	0.108919	0.703731		0.9324	1.2412	1.052	0.8734		100	100	100	100		Lipid	Phosphatidylcholine (PC)	100009146
2355			1-stearoyl-2-docosapentaenoyl-GPC (18:0/22:5n3)*	LC/MS pos late	52699		HMDB0008056	24778873		0.95	0.65	0.75	0.68	0.79	1.15		0.721143	0.466832	0.000272767	0.107885	0.060745	0.577955	0.0104657	0.0436119	0.0560722	0.103599	0.44434	0.852161		1.2818	1.221	0.8324	0.9599		100	100	100	100		Lipid	Phosphatidylcholine (PC)	100009141
2356			1-stearoyl-2-docosapentaenoyl-GPC (18:0/22:5n6)*	LC/MS pos late	52700		HMDB0008055	24778871		1	0.67	0.81	0.67	0.8	1.2		0.944311	0.530639	0.0602331	0.551308	0.300072	0.706618	0.0075025	0.0378015	0.126475	0.157499	0.662857	0.920108		1.0931	1.0972	0.7375	0.8814		100	100	100	100		Lipid	Phosphatidylcholine (PC)	100009142
2357			1-stearoyl-2-docosahexaenoyl-GPC (18:0/22:6)	LC/MS pos late	52611		HMDB0008057	24778876		1.4	0.82	0.89	0.59	0.63	1.07		0.0988172	0.144356	0.547036	0.726638	0.659151	0.829943	0.00558287	0.03673	0.0198354	0.0701988	0.906439	0.942048		1.0393	1.4601	0.8563	0.9203		100	100	100	100		Lipid	Phosphatidylcholine (PC)	100008916	59403-52-0
2366			1-oleoyl-2-linoleoyl-GPC (18:1/18:2)*	LC/MS pos late	52453		HMDB0008105	24778939		0.58	0.89	0.83	1.54	1.45	0.94		0.0164269	0.0535337	0.671501	0.754522	0.402903	0.744374	0.018452	0.0532048	0.00071831	0.0408052	0.471364	0.866632		1.2354	0.7128	1.0959	1.0307		100	100	100	100		Lipid	Phosphatidylcholine (PC)	100008981
2376			1-oleoyl-2-docosahexaenoyl-GPC (18:1/22:6)*	LC/MS pos late	52697		HMDB0008123	24778955		0.82	0.73	0.76	0.89	0.92	1.03		0.384751	0.339866	0.139496	0.551308	0.210061	0.662551	0.284649	0.230041	0.277612	0.266756	0.695175	0.920108		1.1927	0.982	0.8727	0.903		100	100	100	100		Lipid	Phosphatidylcholine (PC)	100009130
2377			1,2-dilinoleoyl-GPC (18:2/18:2)	LC/MS pos late	52603		HMDB0008138	5288075		0.45	0.8	0.78	1.77	1.74	0.98		0.0649649	0.110795	0.721189	0.773858	0.519049	0.774738	0.0339344	0.0694876	0.000690057	0.0408052	0.507184	0.872892		1.4762	0.6655	1.1768	1.156		100	100	100	100		Lipid	Phosphatidylcholine (PC)	100008903	998-06-1
2378			1-linoleoyl-2-linolenoyl-GPC (18:2/18:3)*	LC/MS pos late	53176		HMDB0008141	52922731		0.42	1	0.99	2.38	2.37	0.99		0.0503785	0.095726	0.950227	0.798344	0.685078	0.84334	0.0133216	0.0464947	0.00367638	0.0408052	0.455394	0.857653		1.6235	0.6796	1.6192	1.6096		100	100	100	100		Lipid	Phosphatidylcholine (PC)	100009343
2383			1-linoleoyl-2-arachidonoyl-GPC (18:2/20:4n6)*	LC/MS pos late	52710	C05208	HMDB0008147	24778979		0.64	0.9	0.9	1.42	1.42	1		0.0737498	0.120239	0.739246	0.773858	0.781725	0.85544	0.0869324	0.115644	0.00721414	0.0469288	0.909367	0.942048		1.2187	0.7739	1.0959	1.0996		100	100	100	100		Lipid	Phosphatidylcholine (PC)	100009131
2392			1-arachidoyl-2-arachidonoyl-GPC (20:0/20:4)*	LC/MS pos late	55062		HMDB0008279	24779048		0.71	0.93	1.2	1.3	1.68	1.29		0.179153	0.216557	0.845896	0.785893	0.472568	0.755964	0.39028	0.276157	0.0898911	0.131704	0.0645713	0.703731		1.1887	0.8489	1.1058	1.4292		100	100	100	100		Lipid	Phosphatidylcholine (PC)	100009126
2426		Phosphatidylethanolamine (PE)	1-palmitoyl-2-oleoyl-GPE (16:0/18:1)	LC/MS pos late	19263		HMDB0005320	5283496		0.16	0.35	0.52	2.16	3.19	1.48		0.00142778	0.0118981	0.0619544	0.551308	0.318018	0.72078	0.15748	0.163082	0.0268457	0.0737224	0.174037	0.734339		1.4837	0.2409	0.5198	0.7677		75	43	57	71		Lipid	Phosphatidylethanolamine (PE)	1526	26662-94-2
2428			1-palmitoyl-2-linoleoyl-GPE (16:0/18:2)	LC/MS pos late	42449		HMDB0005322	9546747		0.2	0.36	0.51	1.74	2.49	1.43		0.00104909	0.0108661	0.0246068	0.519117	0.155576	0.648226	0.349361	0.262644	0.0591614	0.107076	0.183982	0.734339		1.4002	0.2869	0.4979	0.7142		92	29	43	57		Lipid	Phosphatidylethanolamine (PE)	100001870
2434			1-palmitoyl-2-arachidonoyl-GPE (16:0/20:4)*	LC/MS pos late	52464	C05210	HMDB0005323	9546800		0.63	0.64	1.02	1.01	1.63	1.61		0.110455	0.152848	0.10835	0.551308	0.778923	0.85544	0.541619	0.339594	0.0663276	0.113377	0.0776363	0.703731		1.4844	0.9305	0.9429	1.5186		100	100	100	100		Lipid	Phosphatidylethanolamine (PE)	100008990
2436			1-palmitoyl-2-docosahexaenoyl-GPE (16:0/22:6)*	LC/MS pos late	52465		HMDB0008946	9546799		0.36	0.39	0.5	1.08	1.39	1.28		0.0321675	0.0761977	0.0538215	0.551308	0.21712	0.666275	0.574296	0.348391	0.214673	0.223825	0.215485	0.743264		2.1735	0.791	0.853	1.0959		92	86	100	100		Lipid	Phosphatidylethanolamine (PE)	100008991
2443			1-stearoyl-2-oleoyl-GPE (18:0/18:1)	LC/MS pos late	42448		HMDB0008993	9546742		0.09	0.27	0.49	2.94	5.21	1.78		0.000895945	0.0100696	0.0629016	0.551308	0.201817	0.662551	0.0234412	0.0585545	0.110183	0.144199	0.727797	0.923804		1.9764	0.1847	0.5421	0.9623		83	29	86	57		Lipid	Phosphatidylethanolamine (PE)	100001856
2447			1-stearoyl-2-linoleoyl-GPE (18:0/18:2)*	LC/MS pos late	52446		HMDB0008994	9546749		0.2	0.44	0.61	2.15	2.98	1.38		0.000500214	0.00800702	0.0680312	0.551308	0.258805	0.682672	0.00870608	0.0398698	0.0244069	0.0732182	0.705995	0.920108		2.6815	0.5485	1.1807	1.634		100	100	100	100		Lipid	Phosphatidylethanolamine (PE)	100008976
2456			1-stearoyl-2-arachidonoyl-GPE (18:0/20:4)	LC/MS pos late	52447	C05210	HMDB0009003	5289133		0.56	0.67	0.87	1.2	1.57	1.3		0.129396	0.172171	0.442673	0.694802	0.996855	0.887233	0.0785568	0.109865	0.106453	0.141219	0.429453	0.845053		1.5129	0.8418	1.0115	1.3175		100	100	100	100		Lipid	Phosphatidylethanolamine (PE)	100008977
2460			1-stearoyl-2-docosahexaenoyl-GPE (18:0/22:6)*	LC/MS pos late	52466		HMDB0009012	9546798		0.64	0.68	0.71	1.07	1.11	1.04		0.100572	0.144943	0.18193	0.579607	0.257797	0.682672	0.693978	0.393019	0.6467	0.414093	0.8624	0.942048		1.2594	0.8031	0.8568	0.8947		75	71	71	71		Lipid	Phosphatidylethanolamine (PE)	100008992
2523		Phosphatidylserine (PS)	1-stearoyl-2-oleoyl-GPS (18:0/18:1)	LC/MS pos late	19265		HMDB0010163	9547087		1.36	1.03	2.17	0.76	1.6	2.1		0.402953	0.349516	0.805816	0.782098	0.129277	0.638125	0.544463	0.340008	0.42382	0.330217	0.0420276	0.672423		0.6659	0.9053	0.6876	1.4457		67	71	71	71		Lipid	Phosphatidylserine (PS)	100000639
2545		Phosphatidylglycerol (PG)	1-stearoyl-2-oleoyl-GPG (18:0/18:1)	LC/MS polar	52623		HMDB0010604	24779551		0.96	1.15	1.19	1.19	1.23	1.03		0.826297	0.493594	0.514048	0.720287	0.305785	0.712315	0.480378	0.313833	0.126614	0.157499	0.484567	0.866632		0.9143	0.8816	1.0518	1.0873		92	100	100	100		Lipid	Phosphatidylglycerol (PG)	100001866	322647-48-3
2552		Phosphatidylinositol (PI)	1-palmitoyl-2-oleoyl-GPI (16:0/18:1)*	LC/MS pos late	52669		HMDB0009783	71296232		0.55	0.79	0.85	1.42	1.53	1.08		0.0225907	0.0621522	0.423275	0.681928	0.609154	0.80654	0.0332944	0.069351	0.0141624	0.0624321	0.661142	0.920108		1.4265	0.7894	1.1221	1.2104		100	100	100	100		Lipid	Phosphatidylinositol (PI)	100009066
2554			1-palmitoyl-2-linoleoyl-GPI (16:0/18:2)	LC/MS polar	52450		HMDB0009784	46891795		0.59	0.81	0.85	1.36	1.44	1.06		0.0254565	0.0672353	0.335881	0.639031	0.471293	0.755964	0.0292516	0.0641494	0.0249639	0.0732182	0.551857	0.895819		1.2152	0.7197	0.982	1.0362		100	100	100	100		Lipid	Phosphatidylinositol (PI)	1528
2557			1-palmitoyl-2-arachidonoyl-GPI (16:0/20:4)*	LC/MS pos late	52467		HMDB0009789			0.65	0.97	0.97	1.49	1.49	1		0.117811	0.15998	0.970136	0.800846	0.965244	0.882192	0.143594	0.155089	0.07301	0.117988	0.887403	0.942048		1.2252	0.796	1.1869	1.184		100	100	100	100		Lipid	Phosphatidylinositol (PI)	100008993
2560			1-stearoyl-2-oleoyl-GPI (18:0/18:1)*	LC/MS pos late	52726		HMDB0240667			0.58	0.78	0.84	1.35	1.46	1.08		0.0061832	0.0308132	0.206087	0.579607	0.327127	0.72078	0.300754	0.236509	0.236095	0.241156	0.717351	0.922872		1.1568	0.6714	0.9063	0.977		100	100	100	100		Lipid	Phosphatidylinositol (PI)	100009181
2561			1-stearoyl-2-linoleoyl-GPI (18:0/18:2)	LC/MS pos late	52468		HMDB0009809			0.62	0.7	0.7	1.12	1.13	1.01		0.0394978	0.0862657	0.103628	0.551308	0.1039	0.617178	0.384054	0.274307	0.562477	0.386163	0.927028	0.94919		1.4427	0.8946	1.0052	1.0125		100	100	100	100		Lipid	Phosphatidylinositol (PI)	100008994
2566			1-oleoyl-2-linoleoyl-GPI (18:1/18:2)*	LC/MS polar	52451		HMDB0009838	52928384		0.54	0.72	0.75	1.32	1.38	1.05		0.0208606	0.0598877	0.169388	0.579607	0.243637	0.682672	0.055645	0.0897148	0.00892445	0.0517114	0.910015	0.942048		1.5242	0.8301	1.0957	1.1478		100	100	100	100		Lipid	Phosphatidylinositol (PI)	100008979
2574			1-stearoyl-2-arachidonoyl-GPI (18:0/20:4)	LC/MS pos late	52449		HMDB0009815			0.98	1	0.96	1.02	0.98	0.96		0.866927	0.509959	0.809135	0.782923	0.781973	0.85544	0.680089	0.387886	0.64683	0.414093	0.956752	0.950247		1.0554	1.0352	1.0567	1.0125		100	100	100	100		Lipid	Phosphatidylinositol (PI)	100000616	383907-33-3
2576			1-stearoyl-2-dihomo-linolenoyl-GPI (18:0/20:3n3 or 6)*	LC/MS pos late	54984		HMDB0009814			0.92	1.04	0.87	1.14	0.94	0.83		0.59421	0.42939	0.937009	0.793437	0.371073	0.736869	0.659101	0.379671	0.590094	0.39752	0.259773	0.782573		1.1847	1.0872	1.234	1.0255		100	100	100	100		Lipid	Phosphatidylinositol (PI)	100009184
2579			1-oleoyl-2-arachidonoyl-GPI (18:1/20:4)*	LC/MS polar	54994					0.63	0.79	0.78	1.25	1.23	0.98		0.00876623	0.0375725	0.181288	0.579607	0.139995	0.638125	0.0764865	0.108367	0.0274304	0.0745199	0.906978	0.942048		1.3055	0.8225	1.0284	1.012		100	100	100	100		Lipid	Phosphatidylinositol (PI)	100010951
2580			1-stearoyl-2-docosahexaenoyl-GPI (18:0/22:6)*	LC/MS pos late	52668		HMDB0009821	52927465		0.78	0.75	0.82	0.97	1.05	1.09		0.350923	0.323435	0.273088	0.596776	0.372193	0.736869	0.608851	0.364329	0.78162	0.463042	0.808516	0.935671		1.0512	0.8172	0.7935	0.8613		92	100	100	100		Lipid	Phosphatidylinositol (PI)	100009067
2605		Lysophospholipid	1-linoleoyl-GPA (18:2)*	LC/MS polar	52690		HMDB0007856			0.76	0.86	1.13	1.14	1.5	1.32		0.344304	0.321333	0.788016	0.778124	0.833161	0.868761	0.357713	0.263125	0.285538	0.271259	0.497373	0.870645		1.3416	1.013	1.1502	1.5145		100	100	100	100		Lipid	Lysophospholipid	100009082
2610			1-arachidonoyl-GPA (20:4)	LC/MS neg	46325		HMDB0062312	42607498		1.57	1.55	2.13	0.99	1.36	1.38		0.244918	0.257207	0.474488	0.71493	0.0293037	0.552106	0.768889	0.415693	0.304513	0.27824	0.0455444	0.672423		0.7023	1.1007	1.0864	1.4991		42	71	71	100		Lipid	Lysophospholipid	100004442	799268-65-8
2613			1-myristoyl-GPC (14:0)	LC/MS pos late	45453	C04230	HMDB0010379	460604		0.6	1.2	1.24	1.98	2.05	1.03		0.00116693	0.0110258	0.692139	0.767697	0.547834	0.781269	0.0456398	0.0789592	0.034647	0.0809848	0.70491	0.920108		1.1192	0.6764	1.3413	1.3865		100	100	100	100		Lipid	Lysophospholipid	100001383	20559-16-4
2614			2-myristoyl-GPC (14:0)*	LC/MS pos late	35626		HMDB0010379	460604		0.57	1.11	1.39	1.96	2.45	1.25		0.000952864	0.0102722	0.655716	0.751486	0.35417	0.72078	0.0132364	0.0464947	0.0156307	0.0643676	0.174792	0.734339		0.8407	0.4768	0.9357	1.1691		83	14	71	86		Lipid	Lysophospholipid	100001563
2617			1-pentadecanoyl-GPC (15:0)*	LC/MS pos late	37418		HMDB0010381	24779458		0.59	1.04	1.23	1.76	2.09	1.18		9.80859e-05	0.00344547	0.908533	0.789259	0.557979	0.784094	0.0122869	0.0464461	0.0284773	0.0757205	0.265715	0.782573		1.1674	0.6891	1.2151	1.4377		100	100	100	100		Lipid	Lysophospholipid	100002173
2618			1-palmitoyl-GPC (16:0)	LC/MS pos late	33955	C04102	HMDB0010382	86554		0.7	0.94	1.09	1.35	1.56	1.16		0.00431546	0.0239909	0.704263	0.768423	0.611412	0.80654	0.0598297	0.0934691	0.0388598	0.0855261	0.166471	0.734339		1.1011	0.7686	1.0346	1.1979		100	100	100	100		Lipid	Lysophospholipid	100001263	17364-16-8
2619			2-palmitoyl-GPC (16:0)*	LC/MS neg	35253		HMDB0061702	15061532		0.69	1.04	1.09	1.52	1.59	1.05		0.0281007	0.0708881	0.76706	0.778124	0.586376	0.800566	0.0992551	0.123687	0.0644979	0.11177	0.624012	0.920108		1.11	0.7607	1.1532	1.2133		100	100	100	100		Lipid	Lysophospholipid	100001562
2620			1-palmitoleoyl-GPC (16:1)*	LC/MS pos late	33230		HMDB0010383	24779461		0.56	0.99	1.13	1.77	2.02	1.14		0.0138877	0.0495675	0.897417	0.789259	0.758975	0.854631	0.0196895	0.0544214	0.0107229	0.0556562	0.436674	0.846183		1.1517	0.6426	1.1393	1.2959		100	100	100	100		Lipid	Lysophospholipid	100001511
2621			2-palmitoleoyl-GPC (16:1)*	LC/MS neg	47118		HMDB10383	122164832		0.55	0.86	1.09	1.57	1.99	1.27		0.0478035	0.0931792	0.562938	0.726638	0.694149	0.843715	0.201589	0.187954	0.0372344	0.0839106	0.254928	0.782573		1.0152	0.5564	0.8737	1.1055		100	71	100	86		Lipid	Lysophospholipid	100001561
2629			1-stearoyl-GPC (18:0)	LC/MS pos late	33961		HMDB0010384	497300		0.99	0.98	1.11	0.99	1.12	1.13		0.947947	0.530639	0.903878	0.789259	0.539682	0.778204	0.87972	0.448613	0.635612	0.413763	0.160873	0.734339		1.0714	1.0655	1.053	1.1885		100	100	100	100		Lipid	Lysophospholipid	100001271	19420-57-6
2631			1-oleoyl-GPC (18:1)	LC/MS pos late	48258	C03916	HMDB0002815	16081932		0.46	0.93	0.88	2	1.9	0.95		2.20429e-05	0.00194065	0.596794	0.738422	0.396563	0.744374	0.00120417	0.0274573	0.00174274	0.0408052	0.548366	0.895819		1.2111	0.5605	1.1212	1.0634		100	100	100	100		Lipid	Lysophospholipid	100001272	19420-56-5
2634			1-linoleoyl-GPC (18:2)	LC/MS pos late	34419	C04100	HMDB0010386	11988421		0.35	0.94	0.88	2.68	2.51	0.94		0.000277426	0.00563642	0.750438	0.778124	0.422995	0.744374	0.000297843	0.0181999	0.00266743	0.0408052	0.376419	0.819254		1.4693	0.516	1.3837	1.2976		100	100	100	100		Lipid	Lysophospholipid	100001395
2636			1-linolenoyl-GPC (18:3)*	LC/MS pos late	45951	C04100	HMDB0010388			0.36	1.3	1.35	3.59	3.73	1.04		0.0136297	0.0493131	0.508261	0.720287	0.830548	0.868761	0.00468534	0.03673	0.00144758	0.0408052	0.678444	0.920108		1.4565	0.528	1.896	1.9671		100	100	100	100		Lipid	Lysophospholipid	100005350
2639			1-nonadecanoyl-GPC (19:0)	LC/MS pos late	47087					0.69	0.97	1.3	1.42	1.89	1.34		0.00108069	0.0109781	0.722518	0.773858	0.543839	0.778204	0.0349377	0.069743	0.0571301	0.104569	0.185137	0.734339		1.153	0.7928	1.124	1.5019		100	100	100	100		Lipid	Lysophospholipid	100005353	108273-88-7
2640			1-nonadecenoyl-GPC (19:1)*	LC/MS pos late	62429					0.51	0.76	1.12	1.48	2.19	1.48		5.27599e-05	0.0029193	0.0988317	0.551308	0.91794	0.87517	0.0431655	0.076666	0.0293961	0.0765436	0.063895	0.703731		1.3637	0.6946	1.0296	1.5235		100	100	100	100		Lipid	Lysophospholipid	100020743
2642			1-arachidoyl-GPC (20:0)	LC/MS pos late	45456	C04230	HMDB0010390	24779473		0.51	0.79	1.21	1.56	2.39	1.53		0.000843297	0.0100696	0.301764	0.618792	0.607846	0.80654	0.0396543	0.0744839	0.0264168	0.0737224	0.03874	0.672423		1.3518	0.6836	1.0684	1.6335		100	100	100	100		Lipid	Lysophospholipid	100001384	108341-80-6
2645			1-eicosenoyl-GPC (20:1)*	LC/MS pos late	44560		HMDB0010391	52924051		0.41	0.65	0.84	1.6	2.07	1.29		0.00360317	0.0216288	0.276118	0.596776	0.900157	0.87517	0.000947828	0.0274573	0.00216986	0.0408052	0.166433	0.734339		1.6139	0.658	1.0517	1.3593		100	100	100	100		Lipid	Lysophospholipid	100005352
2647			1-dihomo-linoleoyl-GPC (20:2)*	LC/MS pos late	33871		HMDB0010392			0.35	0.7	0.89	1.98	2.52	1.28		0.00227669	0.0160351	0.102958	0.551308	0.455345	0.753573	0.0238473	0.0589385	0.0300318	0.0770021	0.345058	0.81569		1.3947	0.4909	0.9706	1.2389		100	86	100	100		Lipid	Lysophospholipid	100001553
2648			1-dihomo-linolenoyl-GPC (20:3n3 or 6)*	LC/MS pos late	33821		HMDB0010394	52924055		0.49	1.15	0.98	2.32	1.98	0.86		0.00162422	0.0126172	0.869649	0.785893	0.599398	0.805222	0.00232612	0.027883	0.00300544	0.0408052	0.375624	0.819254		1.2577	0.6217	1.4427	1.234		100	100	100	100		Lipid	Lysophospholipid	100001552
2653			1-arachidonoyl-GPC (20:4n6)*	LC/MS pos late	33228	C05208	HMDB0010395	24779476		0.68	1.27	1.14	1.88	1.69	0.9		0.243299	0.256526	0.268452	0.595292	0.410894	0.744374	0.0209308	0.0555515	0.0399053	0.0868152	0.540687	0.891693		1.2265	0.8282	1.5609	1.3987		100	100	100	100		Lipid	Lysophospholipid	100001551
2654			1-eicosapentaenoyl-GPC (20:5)*	LC/MS pos late	44563		HMDB0010397			0.19	0.64	0.67	3.28	3.44	1.05		0.0065967	0.0316784	0.621195	0.742984	0.620541	0.810097	8.13761e-05	0.0159526	0.00602921	0.0449856	0.98953	0.953784		2.3834	0.4616	1.5145	1.5875		100	100	100	100		Lipid	Lysophospholipid	100005351
2655			1-heneicosanoyl-GPC (21:0)*	LC/MS pos late	62457					0.33	0.79	1.34	2.37	4.01	1.69		0.0127694	0.0471698	0.864394	0.785893	0.307349	0.712315	0.00277377	0.0295719	0.0064727	0.0449856	0.189879	0.735893		1.1073	0.3696	0.8774	1.4835		67	29	86	86		Lipid	Lysophospholipid	100020779
2656			1-behenoyl-GPC (22:0)	LC/MS pos late	39792		HMDB0010398	24779479		0.49	0.91	1.17	1.87	2.41	1.29		0.00549162	0.02844	0.835603	0.785893	0.435439	0.744947	0.0331251	0.069351	0.0169598	0.0663066	0.104962	0.703731		1.2377	0.6023	1.1235	1.4488		100	100	100	100		Lipid	Lysophospholipid	100002868	125146-65-8
2658			1-erucoyl-GPC (22:1)*	LC/MS pos late	55070		HMDB0010399	53480471		0.47	0.76	0.82	1.61	1.74	1.08		0.21571	0.239894	0.840544	0.785893	0.796376	0.860642	0.0229816	0.0579896	0.0157252	0.0643676	0.508498	0.872892		2.0568	0.9686	1.5592	1.6822		100	100	100	100		Lipid	Lysophospholipid	100002869
2659			1-adrenoyl-GPC (22:4)*	LC/MS pos late	52698		HMDB0010401	52924039		0.6	1.26	0.93	2.11	1.56	0.74		0.0451349	0.0899982	0.255744	0.593264	0.948892	0.877636	0.00716471	0.0378015	0.0594783	0.107135	0.0939165	0.703731		1.2567	0.7518	1.5839	1.1737		100	100	100	100		Lipid	Lysophospholipid	100002871
2663			1-docosahexaenoyl-GPC (22:6)*	LC/MS pos late	33822		HMDB0010404	10415542		0.69	0.83	0.89	1.21	1.29	1.07		0.513246	0.399876	0.926476	0.790591	0.864661	0.868761	0.281604	0.228767	0.545996	0.382157	0.750177	0.923804		1.3006	0.8964	1.0858	1.1579		100	100	100	100		Lipid	Lysophospholipid	100001566
2665			1-tricosanoyl-GPC (23:0)*	LC/MS pos late	62456					0.56	1	1.24	1.79	2.22	1.24		0.0416738	0.0877038	0.757375	0.778124	0.360231	0.722319	0.0394673	0.0744839	0.0376346	0.0841361	0.13587	0.734339		1.1014	0.6158	1.1034	1.3662		92	71	100	100		Lipid	Lysophospholipid	100020778
2667			1-lignoceroyl-GPC (24:0)	LC/MS pos late	49617		HMDB0010405	24779481		0.53	0.87	1.09	1.64	2.05	1.24		0.0165738	0.0535337	0.739277	0.773858	0.5435	0.778204	0.0756368	0.107716	0.0225358	0.0731643	0.110571	0.703731		1.2882	0.6843	1.1255	1.4003		100	100	100	100		Lipid	Lysophospholipid	100002873	325171-59-3
2669			1-nervonoyl-GPC (24:1n9)*	LC/MS pos late	55071		HMDB0010406	53480477		0.36	0.65	1.1	1.82	3.09	1.7		0.0755324	0.121274	0.810597	0.782923	0.448682	0.748843	0.000136606	0.0159526	0.00398545	0.0408052	0.044634	0.672423		1.7938	0.6393	1.1609	1.9736		92	86	100	100		Lipid	Lysophospholipid	100002874
2680			1-palmitoyl-GPE (16:0)	LC/MS pos late	35631		HMDB0011503	9547069		0.5	0.73	0.77	1.45	1.52	1.04		0.000573987	0.00884441	0.0437076	0.551308	0.0742064	0.577955	0.0114858	0.0447096	0.0305615	0.0771789	0.748364	0.923804		1.353	0.6832	0.9914	1.0356		100	100	100	100		Lipid	Lysophospholipid	100001567	53862-35-4
2686			1-margaroyl-GPE (17:0)*	LC/MS pos late	37419		HMDB0061691	52925149		0.48	0.89	0.87	1.84	1.8	0.98		0.000210167	0.00482686	0.552541	0.726638	0.551288	0.782356	0.0392879	0.0744839	0.0109464	0.0556562	0.737602	0.923804		1.2572	0.6096	1.1218	1.0976		92	86	86	100		Lipid	Lysophospholipid	100002171
2687			1-stearoyl-GPE (18:0)	LC/MS pos late	42398		HMDB0011130	9547068		0.55	0.8	0.83	1.47	1.52	1.03		1.98371e-05	0.00194065	0.116218	0.551308	0.219314	0.667379	0.00187632	0.0274573	0.0316285	0.0786873	0.996195	0.954738		1.1921	0.6498	0.9576	0.9853		100	100	100	100		Lipid	Lysophospholipid	100001461	69747-55-3
2688			2-stearoyl-GPE (18:0)*	LC/MS neg	41220		HMDB0011129	90658453;53480667		0.58	0.83	0.87	1.43	1.5	1.05		0.00404351	0.0234718	0.451946	0.69994	0.575775	0.794827	0.0193091	0.0540092	0.0514467	0.09944	0.951701	0.950247		1.2609	0.7318	1.048	1.0952		100	100	100	100		Lipid	Lysophospholipid	100003901
2689			1-oleoyl-GPE (18:1)	LC/MS pos late	35628		HMDB0011506	9547071		0.1	0.45	0.48	4.52	4.84	1.07		5.09106e-07	0.000229922	0.0317814	0.519117	0.0527709	0.577955	0.00619081	0.0373849	0.0100799	0.0553493	0.930662	0.94919		3.1986	0.3202	1.4476	1.5482		100	100	100	100		Lipid	Lysophospholipid	100001569	89576-29-4
2691			1-linoleoyl-GPE (18:2)*	LC/MS pos late	36600		HMDB0011507	52925130		0.12	0.47	0.49	3.83	4.02	1.05		5.52649e-05	0.0029193	0.0333664	0.519154	0.0541113	0.577955	0.0487702	0.0828407	0.127823	0.15861	0.559955	0.901949		2.8346	0.3466	1.3289	1.3917		100	86	100	86		Lipid	Lysophospholipid	100001570
2698			1-eicosenoyl-GPE (20:1)*	LC/MS pos late	62352		HMDB0011518	52925139		0.21	0.47	0.53	2.24	2.54	1.13		0.000873173	0.0100696	0.114989	0.551308	0.167447	0.648226	0.0731793	0.105178	0.100209	0.1385	0.914692	0.942048		1.5904	0.333	0.745	0.8452		75	14	57	57		Lipid	Lysophospholipid	100005376
2701			1-dihomo-linolenoyl-GPE (20:3n3 or 6)*	LC/MS pos late	44630		HMDB0011516 HMDB0011514			0.26	0.69	0.45	2.62	1.71	0.65		0.000101494	0.00344547	0.221778	0.579607	0.01553	0.491602	0.0545595	0.0897148	0.355918	0.300778	0.103651	0.703731		1.0462	0.2746	0.7186	0.4691		92	0	57	14		Lipid	Lysophospholipid	100005371
2704			1-arachidonoyl-GPE (20:4n6)*	LC/MS pos late	35186		HMDB0011517	42607465		0.36	0.71	0.64	1.97	1.77	0.9		0.000236115	0.00519686	0.27436	0.596776	0.145308	0.641688	0.0334051	0.069351	0.14369	0.173168	0.493394	0.869177		1.8123	0.6538	1.2856	1.1561		100	100	100	100		Lipid	Lysophospholipid	100001571
2715			1-docosahexaenoyl-GPE (22:6)*	LC/MS neg	44633		HMDB11496	85333229		0.35	0.62	0.51	1.8	1.46	0.81		0.0106569	0.0423261	0.414935	0.681928	0.125451	0.638125	0.00549168	0.03673	0.15551	0.180391	0.10666	0.703731		1.7734	0.6157	1.108	0.9005		100	100	100	100		Lipid	Lysophospholipid	100002060
2720			1-stearoyl-GPS (18:0)*	LC/MS neg	45966		HMDB0061698	74819135		1.97	0.69	4	0.35	2.04	5.8		0.0270152	0.0698536	0.934718	0.793437	0.125495	0.638125	0.0402605	0.0744839	0.908939	0.493288	0.164025	0.734339		0.5051	0.993	0.3488	2.0221		33	86	43	57		Lipid	Lysophospholipid	100004327
2721			1-oleoyl-GPS (18:1)	LC/MS neg	19260		HMDB0061694	85036846		0.61	0.87	4.08	1.41	6.66	4.71		0.680417	0.454964	0.923706	0.790591	0.179162	0.648226	0.818272	0.428876	0.173702	0.196165	0.10079	0.703731		0.3686	0.2257	0.3193	1.5033		25	14	14	71		Lipid	Lysophospholipid	100000630	326589-90-6
2723			1-linoleoyl-GPS (18:2)*	LC/MS neg	43676					0.85	0.39	2.18	0.46	2.56	5.58		0.360198	0.326841	0.6593	0.751486	0.385387	0.738651	0.137535	0.151869	0.789117	0.464015	0.236358	0.766014		1.274	1.0844	0.4977	2.7762		42	86	43	57		Lipid	Lysophospholipid	100004606
2726			1-palmitoyl-GPG (16:0)*	LC/MS neg	45970		HMDB0240601	3300276		0.64	0.79	0.77	1.24	1.21	0.97		0.0246876	0.0658633	0.265723	0.595292	0.214522	0.666275	0.289488	0.231944	0.245785	0.245567	0.673123	0.920108		1.048	0.6665	0.8293	0.8068		92	43	71	57		Lipid	Lysophospholipid	100005717
2729			1-stearoyl-GPG (18:0)	LC/MS neg	34437					0.64	0.6	0.59	0.94	0.92	0.98		0.31584	0.301169	0.199693	0.579607	0.177879	0.648226	0.692492	0.393019	0.49718	0.361587	0.624454	0.920108		1.44	0.9273	0.8676	0.8531		100	86	100	71		Lipid	Lysophospholipid	100001462
2735			1-palmitoyl-GPI (16:0)	LC/MS neg	35305		HMDB0061695	71296207		0.4	0.96	0.98	2.39	2.45	1.02		0.00135192	0.0115183	0.727902	0.773858	0.799215	0.860642	0.00235775	0.027883	0.0023225	0.0408052	0.780599	0.931556		1.6302	0.6555	1.5667	1.6047		100	100	100	100		Lipid	Lysophospholipid	100001655
2739			1-stearoyl-GPI (18:0)	LC/MS neg	19324		HMDB0240261	71581135;42607495		0.65	1.07	1	1.65	1.54	0.93		0.015574	0.0527358	0.814918	0.784223	0.717417	0.849177	0.0709505	0.104312	0.0864899	0.128605	0.775126	0.931556		1.1784	0.7666	1.2647	1.1776		100	100	100	100		Lipid	Lysophospholipid	100000656	796963-93-4
2740			2-stearoyl-GPI (18:0)*	LC/MS neg	39223		HMDB0061704	131770413		0.65	1.1	0.98	1.7	1.51	0.89		0.0310769	0.0749588	0.798378	0.780057	0.661972	0.829943	0.074911	0.107009	0.083899	0.126616	0.754226	0.923804		1.2372	0.8036	1.3638	1.2097		100	100	100	100		Lipid	Lysophospholipid	100003008
2741			1-oleoyl-GPI (18:1)	LC/MS neg	36602		HMDB0061693	86289645		0.44	0.98	1.03	2.24	2.37	1.06		0.0120911	0.0456213	0.57379	0.730901	0.731333	0.852079	0.00572264	0.03673	0.000536031	0.0408052	0.698879	0.920108		1.3087	0.5707	1.2765	1.3503		100	100	100	100		Lipid	Lysophospholipid	100001777
2743			1-linoleoyl-GPI (18:2)*	LC/MS neg	36594		HMDB0240597	11124828		0.38	0.83	0.76	2.18	2	0.92		0.00260157	0.0178473	0.378933	0.669085	0.269381	0.683971	0.00456591	0.03673	0.0130307	0.0612013	0.589234	0.920108		1.7665	0.6727	1.4658	1.344		100	100	100	100		Lipid	Lysophospholipid	100001778
2749			1-arachidonoyl-GPI (20:4)*	LC/MS neg	34214		HMDB0061690	121596217		0.6	1.19	1.01	1.97	1.67	0.85		0.0222876	0.0621522	0.802261	0.78059	0.938394	0.87517	0.0269941	0.0615088	0.0332002	0.0796445	0.425777	0.845053		1.1564	0.6984	1.3782	1.1687		100	100	100	100		Lipid	Lysophospholipid	100001654
2750			2-arachidonoyl-GPI (20:4)*	LC/MS neg	38077					0.56	1.28	1.01	2.27	1.8	0.79		0.0789642	0.124886	0.768444	0.778124	0.914186	0.87517	0.0848063	0.114492	0.0843374	0.126897	0.673061	0.920108		0.9602	0.5406	1.2296	0.971		92	100	86	100		Lipid	Lysophospholipid	100002470
2807		Plasmalogen	1-palmityl-2-palmitoyl-GPC (O-16:0/16:0)*	LC/MS pos late	57332			145911		0.88	1.08	1.15	1.23	1.3	1.06		0.439341	0.371322	0.709945	0.768423	0.294761	0.705044	0.265502	0.220676	0.121104	0.152921	0.492282	0.869177		0.9773	0.8634	1.0586	1.125		100	100	100	100		Lipid	Plasmalogen	100015586
2808			1-palmityl-2-stearoyl-GPC (O-16:0/18:0)*	LC/MS pos late	55040		HMDB0013405	11803170		0.91	1.06	1.01	1.16	1.11	0.95		0.765286	0.476713	0.751254	0.778124	0.983436	0.883479	0.551504	0.342118	0.849646	0.482027	0.430632	0.845053		1.0489	0.9537	1.1096	1.0565		100	100	100	100		Lipid	Plasmalogen	100010966
2810			1-palmityl-2-linoleoyl-GPC (O-16:0/18:2)*	LC/MS pos late	53175		HMDB0011151	6443157		0.7	1.12	1.13	1.59	1.6	1.01		0.0918695	0.136317	0.643773	0.747594	0.426478	0.744374	0.00535507	0.03673	0.00661251	0.0449856	0.68624	0.920108		1.1528	0.8114	1.2888	1.2977		100	100	100	100		Lipid	Plasmalogen	100009134
2813			1-stearyl-2-arachidonoyl-GPC (O-18:0/20:4)*	LC/MS pos late	57333					1.57	1.3	1.28	0.83	0.82	0.99		0.012393	0.0461019	0.120086	0.551308	0.140868	0.638125	0.240369	0.207104	0.178424	0.197939	0.798757	0.935671		0.8916	1.4	1.1601	1.1438		100	100	100	100		Lipid	Plasmalogen	100009019
2816			1-(1-enyl-palmitoyl)-2-docosahexaenoyl-GPC (P-16:0/22:6)*	LC/MS pos late	52630		HMDB0011229	53480699		1.04	1.24	1.44	1.18	1.38	1.17		0.41707	0.358231	0.426217	0.683882	0.341103	0.72078	0.754287	0.412014	0.563667	0.386452	0.383754	0.825559		0.8971	0.9365	1.1083	1.2947		100	100	100	100		Lipid	Plasmalogen	100009008
2818			1-(1-enyl-palmitoyl)-2-oleoyl-GPE (P-16:0/18:1)*	LC/MS pos late	52477		HMDB0011342	52925128		0.93	1.33	1.47	1.43	1.58	1.11		0.608287	0.433045	0.32417	0.631603	0.185128	0.652763	0.129246	0.145539	0.0732516	0.117988	0.578774	0.920108		0.9271	0.8638	1.2311	1.3613		100	100	100	100		Lipid	Plasmalogen	100009005
2819			1-(1-enyl-palmitoyl)-2-linoleoyl-GPE (P-16:0/18:2)*	LC/MS pos late	52677		HMDB0011343	52925127		1.24	1.95	1.99	1.57	1.6	1.02		0.266373	0.272436	0.040578	0.551308	0.0956024	0.590154	0.179265	0.175918	0.346791	0.298934	0.856087	0.942048		0.4689	0.5819	0.9147	0.9326		8	29	57	71		Lipid	Plasmalogen	100009069
2820			1-(1-enyl-palmitoyl)-2-palmitoyl-GPC (P-16:0/16:0)*	LC/MS pos late	52716		HMDB0011206	11146967		0.93	1.07	1.18	1.15	1.27	1.11		0.58491	0.427511	0.926262	0.790591	0.69586	0.843715	0.823441	0.430246	0.454749	0.342628	0.343844	0.81569		0.9313	0.8616	0.9941	1.0985		100	100	100	100		Lipid	Plasmalogen	100009162
2822			1-(1-enyl-palmitoyl)-2-arachidonoyl-GPE (P-16:0/20:4)*	LC/MS pos late	52673		HMDB0011352	52925126		0.96	1.27	1.21	1.32	1.27	0.96		0.80604	0.487362	0.222096	0.579607	0.466951	0.755964	0.0871454	0.115644	0.259951	0.255651	0.490309	0.869177		0.9122	0.8717	1.1541	1.107		100	100	100	100		Lipid	Plasmalogen	100009002
2823			1-(1-enyl-palmitoyl)-2-docosahexaenoyl-GPE (P-16:0/22:6)*	LC/MS pos late	52672		HMDB0005780	5283497		0.88	1.46	1.42	1.65	1.61	0.97		0.870426	0.510313	0.113986	0.551308	0.130508	0.638125	0.0189637	0.0540092	0.0530935	0.100711	0.751862	0.923804		0.9612	0.8484	1.4018	1.3632		100	100	100	100		Lipid	Plasmalogen	100009000
2824			1-(1-enyl-palmitoyl)-2-oleoyl-GPC (P-16:0/18:1)*	LC/MS pos late	52478		HMDB0007996	34779384		0.71	0.99	1.27	1.39	1.78	1.27		0.108446	0.15195	0.903696	0.789259	0.513435	0.772019	0.157805	0.163082	0.0401338	0.086936	0.0299784	0.672423		1.1385	0.8126	1.1318	1.4424		100	100	100	100		Lipid	Plasmalogen	100009007
2827			1-(1-enyl-stearoyl)-2-oleoyl-GPE (P-18:0/18:1)	LC/MS pos late	52614		HMDB0011375	42607457		0.87	0.8	0.98	0.92	1.13	1.23		0.445445	0.374609	0.23191	0.579607	0.89877	0.87517	0.437078	0.293763	0.472543	0.350258	0.174283	0.734339		1.0723	0.9349	0.8583	1.0525		100	100	100	100		Lipid	Plasmalogen	100008919	144371-68-6
2828			1-(1-enyl-stearoyl)-2-linoleoyl-GPE (P-18:0/18:2)*	LC/MS pos late	52748		HMDB0011376			0.92	1	1.13	1.08	1.22	1.13		0.675876	0.45365	0.846044	0.785893	0.611838	0.80654	0.895941	0.452928	0.217641	0.226449	0.28188	0.795136		0.9959	0.9206	0.9929	1.1249		100	100	100	100		Lipid	Plasmalogen	100009225
2831			1-(1-enyl-palmitoyl)-2-arachidonoyl-GPC (P-16:0/20:4)*	LC/MS pos late	52689		HMDB0011220			1.45	1.53	1.54	1.06	1.07	1.01		0.0184291	0.056058	0.153429	0.568199	0.118992	0.638125	0.781975	0.418889	0.858579	0.483665	0.784737	0.934591		0.7666	1.1105	1.1763	1.1843		100	100	100	100		Lipid	Plasmalogen	100009014
2832			1-(1-enyl-palmitoyl)-2-linoleoyl-GPC (P-16:0/18:2)*	LC/MS pos late	52682		HMDB0011211	24779386		0.66	1.12	1.16	1.71	1.77	1.04		0.0667627	0.113034	0.766237	0.778124	0.736781	0.854631	0.00936424	0.04088	0.0247442	0.0732182	0.834751	0.94052		1.1329	0.7429	1.2696	1.3155		100	100	100	100		Lipid	Plasmalogen	100009009
2836			1-(1-enyl-stearoyl)-2-arachidonoyl-GPE (P-18:0/20:4)*	LC/MS pos late	52475		HMDB0005779	9547058		1.15	1.23	1.31	1.07	1.14	1.06		0.153709	0.195642	0.331434	0.636352	0.242051	0.682672	0.972384	0.475155	0.711233	0.435357	0.485419	0.866632		0.8011	0.9206	0.9883	1.0467		100	100	100	100		Lipid	Plasmalogen	100008999
2837			1-(1-enyl-stearoyl)-2-docosahexaenoyl-GPC (P-18:0/22:6)*	LC/MS pos late	52704		HMDB0011262	42607430		1.18	1.04	1.15	0.89	0.98	1.11		0.203846	0.232067	0.730669	0.773858	0.482364	0.755964	0.358662	0.263125	0.653644	0.416333	0.0900975	0.703731		1.0909	1.2819	1.1363	1.2594		100	100	100	100		Lipid	Plasmalogen	100009015
2839			1-(1-enyl-stearoyl)-2-docosahexaenoyl-GPE (P-18:0/22:6)*	LC/MS pos late	52476		HMDB0011394	42607458		1.03	1.18	1.23	1.14	1.19	1.04		0.459084	0.379014	0.490982	0.716481	0.279009	0.690904	0.830238	0.433313	0.376513	0.310163	0.352017	0.81569		0.8647	0.8929	1.0217	1.0602		100	100	100	100		Lipid	Plasmalogen	100009004
2848		Lysoplasmalogen	1-palmityl-GPE (O-16:0)*	LC/MS pos late	55007					0.68	1.51	2.12	2.21	3.09	1.4		0.68451	0.456545	0.202141	0.579607	0.0647291	0.577955	0.0335574	0.0693589	0.019435	0.0701875	0.0895342	0.703731		1.3138	0.8982	1.9893	2.7791		100	71	86	100		Lipid	Lysoplasmalogen	100010962
2849			1-palmityl-GPC (O-16:0)	LC/MS pos late	20458			3983		0.96	1.15	1.68	1.2	1.75	1.46		0.943544	0.530639	0.453332	0.69994	0.0576246	0.577955	0.476064	0.312765	0.104633	0.140837	0.0180238	0.672423		0.955	0.9145	1.0979	1.6032		100	100	100	100		Lipid	Lysoplasmalogen	100000611	52691-62-0
2850			1-stearyl-GPC (O-18:0)*	LC/MS pos late	52703	C04317	HMDB0011149	2733532		1.01	1.13	1.39	1.12	1.38	1.24		0.682649	0.45588	0.303689	0.620283	0.0603914	0.577955	0.514261	0.328616	0.17785	0.197739	0.0411185	0.672423		0.9639	0.9735	1.0859	1.342		100	100	100	100		Lipid	Lysoplasmalogen	100009147
2851			1-stearyl-GPE (O-18:0)*	LC/MS pos late	61501			46891690		0.71	0.99	1.36	1.38	1.9	1.37		0.226283	0.246456	0.978223	0.804378	0.190341	0.652763	0.295253	0.233757	0.0111856	0.0556562	0.0180042	0.672423		1.1652	0.833	1.1513	1.5795		100	100	100	100		Lipid	Lysoplasmalogen	100009198
2852			1-(1-enyl-palmitoyl)-GPC (P-16:0)*	LC/MS pos late	52474		HMDB0010407	10917802		0.66	0.95	1.44	1.43	2.17	1.51		0.0400391	0.0862657	0.776001	0.778124	0.417212	0.744374	0.184196	0.179251	0.0751535	0.119815	0.0379203	0.672423		1.2723	0.8453	1.2125	1.8327		100	100	100	100		Lipid	Lysoplasmalogen	100002875
2853			1-(1-enyl-palmitoyl)-GPE (P-16:0)*	LC/MS pos late	39270		HMDB0011152			0.93	0.92	1.78	1	1.91	1.92		0.956982	0.531618	0.879927	0.786109	0.203193	0.662551	0.755089	0.412014	0.113971	0.147238	0.0595419	0.703731		1.0779	1.0005	0.9956	1.9137		100	100	100	100		Lipid	Lysoplasmalogen	100003000
2855			1-(1-enyl-oleoyl)-GPE (P-18:1)*	LC/MS pos late	44621					0.91	0.58	1.8	0.64	1.98	3.11		0.641839	0.444495	0.239145	0.583867	0.346413	0.72078	0.057356	0.0917526	0.351659	0.299534	0.0600822	0.703731		1.4288	1.3027	0.8277	2.574		100	100	100	100		Lipid	Lysoplasmalogen	100005372
2857			1-(1-enyl-stearoyl)-GPE (P-18:0)*	LC/MS pos late	39271		HMDB0240598			0.8	0.7	1.55	0.88	1.93	2.21		0.957621	0.531618	0.548865	0.726638	0.254778	0.682672	0.330501	0.253084	0.180487	0.199348	0.0652413	0.703731		1.3689	1.1007	0.9639	2.1286		100	100	100	100		Lipid	Lysoplasmalogen	100003001
2860		Glycerolipid Metabolism	glycerol	LC/MS neg	15122	C00116	HMDB0000131	753		1.41	1.11	0.99	0.78	0.7	0.9		0.102939	0.147002	0.61678	0.742984	0.863257	0.868761	0.0311448	0.0666151	0.0818287	0.124993	0.255856	0.782573		1.0718	1.5144	1.1851	1.0649		100	100	100	100		Lipid	Glycerolipid Metabolism	1254	56-81-5
2861			glycerol 3-phosphate	LC/MS pos early	43847	C0093	HMDB0000126	754		0.62	0.89	0.97	1.42	1.55	1.09		0.0217936	0.0613409	0.592654	0.737301	0.964268	0.882192	0.223458	0.199413	0.100317	0.1385	0.296427	0.795136		1.3077	0.8167	1.1596	1.2685		100	100	100	100		Lipid	Glycerolipid Metabolism	100000258	29849-82-9
2874		Monoacylglycerol	1-oleoylglycerol (18:1)	LC/MS neg	21184		HMDB0011567	5283468		0.39	0.78	0.73	1.99	1.86	0.94		0.00280473	0.0185196	0.553126	0.726638	0.431746	0.744947	0.00278554	0.0295719	0.0250017	0.0732182	0.746252	0.923804		1.6514	0.6454	1.2854	1.2036		100	86	100	100		Lipid	Monoacylglycerol	100000924	111-03-5
2875			1-linoleoylglycerol (18:2)	LC/MS neg	27447		HMDB0011568	5283469		0.42	0.97	0.82	2.29	1.96	0.85		0.00548459	0.02844	0.87257	0.785893	0.47843	0.755964	0.00178227	0.0274573	0.0310563	0.0776481	0.170781	0.734339		1.5915	0.6698	1.5369	1.3123		100	100	100	100		Lipid	Monoacylglycerol	100001040	2277-28-3
2880			1-dihomo-linolenylglycerol (20:3)	LC/MS neg	48341		HMDB0011577			0.54	1.07	0.8	1.99	1.49	0.75		0.0175424	0.0552045	0.92031	0.790341	0.382924	0.738651	0.0215364	0.0560408	0.0212568	0.0721794	0.345316	0.81569		1.0113	0.5454	1.0842	0.8133		92	43	86	86		Lipid	Monoacylglycerol	100006121
2881			1-arachidonylglycerol (20:4)	LC/MS neg	34397	C13857	HMDB11578	16019980;5282281		0.79	1.38	1.14	1.74	1.44	0.83		0.936675	0.528054	0.4407	0.694802	0.71212	0.849177	0.236642	0.20542	0.53553	0.37799	0.294853	0.795136		1.1052	0.8731	1.5233	1.2594		100	100	100	100		Lipid	Monoacylglycerol	100001433	35474-99-8
2885			1-docosahexaenoylglycerol (22:6)	LC/MS neg	35153		HMDB0011587	53480995		0.66	0.66	0.66	1.01	1	0.99		0.590222	0.42932	0.546714	0.726638	0.552584	0.782356	0.913438	0.45781	0.895735	0.488417	0.997951	0.954738		1.4609	0.9582	0.9704	0.9598		83	100	86	71		Lipid	Monoacylglycerol	100001481
2891			2-linoleoylglycerol (18:2)	LC/MS neg	32506		HMDB0011538	5365676		0.63	1.13	1.04	1.81	1.65	0.91		0.230289	0.249789	0.584248	0.734758	0.884375	0.872229	0.0938655	0.120787	0.269823	0.262457	0.61635	0.920108		0.8859	0.556	1.0049	0.9185		75	43	86	71		Lipid	Monoacylglycerol	100000987	3443-82-1
2908		Diacylglycerol	diacylglycerol (16:1/18:2 [2], 16:0/18:3 [1])*	LC/MS pos late	54966					0.14	0.59	1.06	4.23	7.58	1.79		0.0354873	0.08011	0.41951	0.681928	0.607042	0.80654	0.365513	0.266288	0.0134883	0.062188	0.13622	0.734339		1.2764	0.1778	0.7528	1.3471		75	29	43	71		Lipid	Diacylglycerol	100010940
2924			palmitoyl-oleoyl-glycerol (16:0/18:1) [2]*	LC/MS pos late	54942	C13861	HMDB0007102	5282283		0.44	0.44	0.88	1	2.02	2.02		0.0373941	0.0833457	0.0385927	0.547785	0.671542	0.832656	0.834315	0.434906	0.289296	0.272624	0.262835	0.782573		0.9731	0.4254	0.4238	0.8575		67	14	43	57		Lipid	Diacylglycerol	100010917
2925			palmitoyl-linoleoyl-glycerol (16:0/18:2) [1]*	LC/MS pos late	52633		HMDB0007103	9543695		0.54	0.56	0.82	1.04	1.53	1.47		0.508737	0.397413	0.396701	0.67404	0.748313	0.854631	0.675207	0.385572	0.893262	0.487942	0.723156	0.923804		2.0454	1.0966	1.1432	1.682		92	100	100	100		Lipid	Diacylglycerol	100009052
2926			palmitoyl-linoleoyl-glycerol (16:0/18:2) [2]*	LC/MS pos late	52634		HMDB0007103	131801744		0.58	0.57	0.9	0.97	1.55	1.59		0.370563	0.330651	0.264266	0.595292	0.724974	0.849177	0.660158	0.379671	0.841286	0.480977	0.650379	0.920108		1.8254	1.0645	1.0344	1.6467		100	100	100	100		Lipid	Diacylglycerol	100009055
2930			palmitoleoyl-linoleoyl-glycerol (16:1/18:2) [1]*	LC/MS pos late	54967		HMDB0007132	9543699		0.32	0.52	0.93	1.62	2.89	1.78		0.0110084	0.0425646	0.129828	0.551308	0.901666	0.87517	0.632433	0.372532	0.00654042	0.0449856	0.0576379	0.703731		1.7048	0.547	0.8867	1.5825		92	86	71	86		Lipid	Diacylglycerol	100010930
2945			oleoyl-linoleoyl-glycerol (18:1/18:2) [1]	LC/MS pos late	46798		HMDB0007219	14275396		0.54	0.5	0.69	0.94	1.27	1.36		0.459923	0.379014	0.263667	0.595292	0.650909	0.823687	0.367655	0.266671	0.897211	0.488506	0.551208	0.895819		1.825	0.9839	0.92	1.2512		100	100	100	100		Lipid	Diacylglycerol	100002989	106292-55-1
2946			oleoyl-linoleoyl-glycerol (18:1/18:2) [2]	LC/MS pos late	46799		HMDB0007219	71433693		0.58	0.51	0.73	0.88	1.27	1.45		0.502108	0.397159	0.207898	0.579607	0.721929	0.849177	0.28406	0.229962	0.878442	0.486284	0.434296	0.846183		1.86	1.0706	0.9399	1.3632		100	100	100	100		Lipid	Diacylglycerol	100002990	104346-53-4
2950			linoleoyl-linoleoyl-glycerol (18:2/18:2) [1]*	LC/MS pos late	54968		HMDB0007248	9543729		0.53	0.53	0.79	1	1.49	1.49		0.361239	0.326841	0.282806	0.606261	0.831507	0.868761	0.511631	0.327383	0.495604	0.361487	0.2992	0.795136		1.9393	1.0302	1.028	1.5348		100	100	100	100		Lipid	Diacylglycerol	100010941
2951			linoleoyl-linoleoyl-glycerol (18:2/18:2) [2]*	LC/MS pos late	54969		HMDB0007248	9543729		0.79	0.53	0.88	0.67	1.11	1.65		0.631294	0.443449	0.31288	0.620283	0.854218	0.868761	0.0242841	0.0593898	0.844914	0.480977	0.141468	0.734339		1.4599	1.1602	0.7797	1.2882		100	100	100	100		Lipid	Diacylglycerol	100010942
2953			linoleoyl-linolenoyl-glycerol (18:2/18:3) [2]*	LC/MS pos late	54964		HMDB0007250	9543737		0.97	1.78	1.62	1.83	1.67	0.91		0.527129	0.405903	0.95899	0.798344	0.180767	0.648226	0.628791	0.371793	0.210509	0.221319	0.339493	0.81569		0.8866	0.8612	1.5754	1.4407		67	86	43	86		Lipid	Diacylglycerol	100010927
2956			stearoyl-arachidonoyl-glycerol (18:0/20:4) [1]*	LC/MS pos late	57450	C00165	HMDB0007170	6438587		0.89	1.02	1.37	1.15	1.54	1.34		0.979833	0.536357	0.977376	0.804378	0.390193	0.74276	0.942562	0.467392	0.355232	0.300778	0.284691	0.795136		1.1462	1.0206	1.1738	1.5709		100	100	100	86		Lipid	Diacylglycerol	100010949
2957			stearoyl-arachidonoyl-glycerol (18:0/20:4) [2]*	LC/MS pos late	57449		HMDB0007170	6438587		0.89	1.11	1.37	1.24	1.53	1.23		0.820813	0.491035	0.821407	0.785148	0.213543	0.666241	0.559715	0.343561	0.147756	0.175958	0.28385	0.795136		1.0422	0.9297	1.1567	1.4244		83	86	71	86		Lipid	Diacylglycerol	100010950
2958			oleoyl-arachidonoyl-glycerol (18:1/20:4) [1]*	LC/MS pos late	54960		HMDB0007228	9543786		0.96	1.19	1.22	1.25	1.27	1.02		0.561753	0.422104	0.115509	0.551308	0.354913	0.72078	0.186827	0.181057	0.676403	0.423144	0.693368	0.920108		1.0463	1.0002	1.2489	1.2746		83	86	100	86		Lipid	Diacylglycerol	100010936
2959			oleoyl-arachidonoyl-glycerol (18:1/20:4) [2]*	LC/MS pos late	54961		HMDB0007228	9543786		1.26	1.18	1.33	0.93	1.06	1.13		0.136813	0.178886	0.131993	0.551308	0.416803	0.744374	0.836442	0.434906	0.720491	0.438354	0.820233	0.936955		0.8768	1.108	1.0322	1.1701		75	100	100	86		Lipid	Diacylglycerol	100010937
2960			linoleoyl-arachidonoyl-glycerol (18:2/20:4) [1]*	LC/MS pos late	54955		HMDB0007257	9543796		1.32	1.33	1.52	1	1.15	1.15		0.0399503	0.0862657	0.078434	0.551308	0.086722	0.577955	0.751058	0.412014	0.934812	0.501053	0.730891	0.923804		0.8777	1.1626	1.1637	1.3349		100	100	100	100		Lipid	Diacylglycerol	100010922
2961			linoleoyl-arachidonoyl-glycerol (18:2/20:4) [2]*	LC/MS pos late	54956		HMDB0007257	9543796		0.8	0.88	0.92	1.1	1.15	1.04		0.882727	0.513535	0.914414	0.789259	0.769402	0.854631	0.994964	0.47912	0.509179	0.36731	0.627927	0.920108		1.3859	1.1096	1.2251	1.2774		100	100	100	100		Lipid	Diacylglycerol	100010923
3019		Sphingolipid Synthesis	sphinganine	LC/MS pos late	17769	C00836	HMDB0000269	3126		1	0.73	1.18	0.73	1.17	1.62		0.352085	0.323435	0.536723	0.726638	0.441816	0.745755	0.0947366	0.12098	0.88905	0.486284	0.171233	0.734339		1.211	1.2166	0.8823	1.4293		100	100	100	100		Lipid	Sphingolipid Synthesis	313	3102-56-5
3020			sphinganine-1-phosphate	LC/MS pos late	52605		HMDB0001383	520		1.46	0.74	0.91	0.51	0.62	1.22		0.030632	0.0744767	0.392624	0.672368	0.769056	0.854631	0.00810176	0.0390148	0.0552784	0.103584	0.428338	0.845053		1.0694	1.556	0.7952	0.9702		100	100	100	86		Lipid	Sphingolipid Synthesis	100001876	19794-97-9
3028		Dihydroceramides	N-palmitoyl-sphinganine (d18:0/16:0)	LC/MS pos late	52604		HMDB11760	5283572		0.55	0.65	0.75	1.19	1.37	1.15		0.0494638	0.0947029	0.189267	0.579607	0.396511	0.744374	0.583228	0.351981	0.380074	0.311591	0.667633	0.920108		1.66	0.9111	1.0824	1.2451		100	100	100	100		Lipid	Dihydroceramides	100009028	5966-29-0
3030			N-palmitoyl-phytosphingosine (t18:0/16:0)	LC/MS pos late	62881		HMDB0010697	10506988		0.84	0.93	0.75	1.11	0.89	0.8		0.560312	0.42162	0.821598	0.785148	0.775511	0.85544	0.688972	0.391518	0.234135	0.239641	0.36433	0.819254		1.3953	1.175	1.3022	1.0435		100	100	86	86		Lipid	Dihydroceramides	100019761
3031			N-stearoyl-sphinganine (d18:0/18:0)*	LC/MS pos late	1759		HMDB0011761	5283573		1.7	0.74	0.73	0.43	0.43	0.99		0.0513922	0.0962669	0.37866	0.669085	0.349286	0.72078	0.00576207	0.03673	0.0175707	0.0663066	0.898375	0.942048		0.857	1.46	0.6323	0.6236		58	100	71	43		Lipid	Dihydroceramides	922	2304-80-5
3040		Ceramides	N-palmitoyl-sphingosine (d18:1/16:0)	LC/MS pos late	44877		HMDB0004949	5283564		0.86	0.9	1.02	1.05	1.19	1.13		0.926338	0.52532	0.926037	0.790591	0.771344	0.854631	0.973197	0.475155	0.643167	0.414093	0.538591	0.891693		1.1682	0.9998	1.0517	1.1892		100	100	100	100		Lipid	Ceramides	1518	24696-26-2
3044			N-stearoyl-sphingosine (d18:1/18:0)*	LC/MS pos late	54979		HMDB0004950	5283565		0.97	0.77	0.82	0.79	0.84	1.06		0.57102	0.422203	0.50083	0.71771	0.646803	0.823242	0.243494	0.208318	0.38901	0.314943	0.560796	0.901949		1.2003	1.1654	0.9263	0.98		100	100	100	100		Lipid	Ceramides	1547	104404-17-3
3062			N-palmitoyl-heptadecasphingosine (d17:1/16:0)*	LC/MS pos late	57430		HMDB0240685			1.12	1.11	1.28	0.99	1.14	1.15		0.26387	0.271133	0.961515	0.798344	0.687698	0.84334	0.431622	0.291775	0.793322	0.464659	0.338907	0.81569		1.0211	1.1462	1.1332	1.3038		100	100	100	100		Lipid	Ceramides	100015731
3067			ceramide (d18:1/17:0, d17:1/18:0)*	LC/MS pos late	57434		HMDB0240678 HMDB0240683			1.15	1.07	1.12	0.92	0.97	1.05		0.208309	0.235625	0.825627	0.785893	0.699011	0.843715	0.379294	0.272156	0.520275	0.372454	0.693894	0.920108		0.9431	1.088	1.0046	1.0547		92	100	86	86		Lipid	Ceramides	100015737
3069			ceramide (d18:1/20:0, d16:1/22:0, d20:1/18:0)*	LC/MS pos late	57440		HMDB0240684 HMDB0004951 HMDB0240682			0.62	0.79	0.88	1.28	1.43	1.12		0.183596	0.218247	0.576457	0.733119	0.977377	0.882192	0.405725	0.282023	0.189805	0.206017	0.400212	0.825559		1.2196	0.7541	0.9645	1.0782		100	100	100	86		Lipid	Ceramides	100015755
3070			ceramide (d16:1/24:1, d18:1/22:1)*	LC/MS pos late	57437					0.98	1	1.18	1.02	1.21	1.18		0.745038	0.470961	0.958917	0.798344	0.702879	0.844845	0.565443	0.345263	0.832932	0.478819	0.623132	0.920108		1.3085	1.2818	1.308	1.547		92	100	86	71		Lipid	Ceramides	100015727
3071			ceramide (d18:2/24:1, d18:1/24:2)*	LC/MS pos late	57443		HMDB0240679 HMDB0240680			0.9	0.81	0.97	0.9	1.08	1.19		0.733896	0.469708	0.769714	0.778124	0.77278	0.855125	0.403014	0.2807	0.99283	0.516645	0.34818	0.81569		1.1956	1.076	0.9729	1.1573		100	100	100	100		Lipid	Ceramides	100015744
3077		Hexosylceramides (HCER)	glycosyl-N-palmitoyl-sphingosine (d18:1/16:0)	LC/MS pos late	53013					0.8	0.95	0.85	1.19	1.06	0.89		0.702595	0.460467	0.921187	0.790341	0.767469	0.854631	0.522204	0.331424	0.981678	0.513714	0.377857	0.819254		1.1956	0.9519	1.1335	1.0116		100	100	100	100		Lipid	Hexosylceramides (HCER)	100009272
3078			glycosyl-N-stearoyl-sphingosine (d18:1/18:0)	LC/MS pos late	52234					0.93	0.75	0.68	0.8	0.73	0.9		0.720618	0.466832	0.349559	0.646062	0.169561	0.648226	0.120087	0.137264	0.0229428	0.0732182	0.264463	0.782573		1.1774	1.0945	0.8798	0.7961		100	100	100	100		Lipid	Hexosylceramides (HCER)	100001882
3098			glycosyl ceramide (d18:1/20:0, d16:1/22:0)*	LC/MS pos late	57595					0.74	0.84	0.78	1.14	1.06	0.94		0.198307	0.228719	0.50439	0.718904	0.355877	0.72078	0.77598	0.417112	0.923654	0.498047	0.667597	0.920108		1.2287	0.9059	1.0293	0.9637		100	100	100	100		Lipid	Hexosylceramides (HCER)	100015882
3102			glycosyl ceramide (d18:2/24:1, d18:1/24:2)*	LC/MS pos late	57453					0.81	1	1.06	1.23	1.31	1.06		0.488268	0.389609	0.831637	0.785893	0.770298	0.854631	0.355768	0.262644	0.336199	0.291806	0.741204	0.923804		1.0626	0.861	1.0605	1.1262		100	100	100	100		Lipid	Hexosylceramides (HCER)	100015745
3118		Dihydrosphingomyelins	myristoyl dihydrosphingomyelin (d18:0/14:0)*	LC/MS pos late	57365		HMDB0012085	44260138		0.81	0.97	0.98	1.19	1.2	1.01		0.274943	0.277696	0.754835	0.778124	0.866664	0.868761	0.519706	0.331189	0.300207	0.275233	0.768015	0.93137		1.2016	0.9759	1.1656	1.1759		100	100	100	100		Lipid	Dihydrosphingomyelins	100009038
3119			palmitoyl dihydrosphingomyelin (d18:0/16:0)*	LC/MS pos late	52434		HMDB0010168	9939965		0.89	0.88	0.9	0.98	1.01	1.03		0.736495	0.46986	0.564931	0.726638	0.618576	0.808754	0.634729	0.373413	0.701293	0.433832	0.945986	0.94919		1.1107	0.9921	0.9752	1.0041		100	100	100	100		Lipid	Dihydrosphingomyelins	100008954
3120			behenoyl dihydrosphingomyelin (d18:0/22:0)*	LC/MS pos late	57331		HMDB0012091	44260132		0.82	1.04	0.91	1.27	1.1	0.87		0.551014	0.417598	0.990827	0.808857	0.809932	0.86653	0.585448	0.35241	0.554335	0.384778	0.727876	0.923804		1.2226	1.0037	1.2764	1.1078		100	100	100	100		Lipid	Dihydrosphingomyelins	100009026
3121			sphingomyelin (d18:0/18:0, d19:0/17:0)*	LC/MS pos late	57473		HMDB0012087	44260130		1.67	0.88	0.72	0.53	0.43	0.81		0.0615391	0.107285	0.881093	0.786109	0.253438	0.682672	0.0075261	0.0378015	0.0153444	0.0643676	0.131244	0.730988		1.101	1.8427	0.9736	0.7887		100	100	100	100		Lipid	Dihydrosphingomyelins	100009027
3122			sphingomyelin (d18:0/20:0, d16:0/22:0)*	LC/MS pos late	57476		HMDB0012090			0.91	0.87	0.84	0.96	0.92	0.96		0.711848	0.464228	0.53353	0.726638	0.409061	0.744374	0.63961	0.373931	0.502313	0.364265	0.605016	0.920108		1.2102	1.0986	1.0543	1.016		100	100	100	100		Lipid	Dihydrosphingomyelins	100015786
3123		Sphingomyelins	palmitoyl sphingomyelin (d18:1/16:0)	LC/MS pos late	37506		HMDB0010169	9939941		1.07	1.09	1.06	1.02	0.99	0.97		0.260254	0.267985	0.465499	0.709495	0.518642	0.774738	0.991871	0.47912	0.790218	0.464015	0.578902	0.920108		0.9077	0.9703	0.9938	0.9619		100	100	100	100		Lipid	Sphingomyelins	100002107	6254-89-3
3124			hydroxypalmitoyl sphingomyelin (d18:1/16:0(OH))**	LC/MS pos late	62851					1.18	1.26	1.16	1.07	0.98	0.92		0.21453	0.239583	0.336061	0.639031	0.449711	0.748843	0.929596	0.462928	0.549769	0.383196	0.320094	0.81569		0.9078	1.0703	1.1406	1.0488		100	100	100	100		Lipid	Sphingomyelins	100021000
3125			stearoyl sphingomyelin (d18:1/18:0)	LC/MS pos late	19503	C00550	HMDB0001348	6453725		1.14	1	0.99	0.88	0.87	0.99		0.201444	0.230529	0.778909	0.778124	0.952024	0.879016	0.343868	0.260654	0.329667	0.289981	0.593816	0.920108		0.9613	1.0994	0.965	0.9554		100	100	100	100		Lipid	Sphingomyelins	1538	85187-10-6;85187-10-6
3126			behenoyl sphingomyelin (d18:1/22:0)*	LC/MS pos late	48492		HMDB0012103	44260125		0.91	0.98	1	1.07	1.09	1.02		0.367389	0.329488	0.780893	0.778124	0.883266	0.872229	0.703817	0.395147	0.526698	0.37477	0.70455	0.920108		1.0255	0.9353	1.0037	1.0235		100	100	100	100		Lipid	Sphingomyelins	100006294
3127			tricosanoyl sphingomyelin (d18:1/23:0)*	LC/MS pos late	52436		HMDB0012105			0.88	1.02	0.94	1.16	1.07	0.92		0.437351	0.370725	0.911096	0.789259	0.691311	0.843715	0.700461	0.394602	0.864554	0.484353	0.545586	0.89501		1.1041	0.9754	1.131	1.0433		100	100	100	100		Lipid	Sphingomyelins	100008955
3128			lignoceroyl sphingomyelin (d18:1/24:0)	LC/MS pos late	57330		HMDB0011697			0.83	0.9	0.88	1.08	1.06	0.98		0.028377	0.0708881	0.407925	0.680312	0.288418	0.697616	0.816498	0.428536	0.706227	0.434394	0.984882	0.953254		1.1445	0.9519	1.0327	1.0097		100	100	100	100		Lipid	Sphingomyelins	100006298	60037-60-7
3129			sphingomyelin (d18:2/18:1)*	LC/MS pos late	57474		HMDB0001348	52931155		1	0.87	0.85	0.87	0.85	0.97		0.691795	0.458938	0.539514	0.726638	0.458133	0.753573	0.371985	0.268578	0.321379	0.286362	0.911987	0.942048		1.1278	1.1226	0.979	0.9536		100	100	100	100		Lipid	Sphingomyelins	100015788
3130			sphingomyelin (d18:2/23:1)*	LC/MS pos late	57482		HMDB0240668			0.9	0.96	1.02	1.06	1.13	1.06		0.708723	0.462761	0.919281	0.790341	0.955413	0.880225	0.837747	0.434906	0.764689	0.456682	0.743514	0.923804		1.0453	0.94	1	1.065		100	100	100	100		Lipid	Sphingomyelins	100015791
3131			sphingomyelin (d18:2/24:2)*	LC/MS pos late	57479		HMDB0240644			0.95	1.02	1.03	1.07	1.08	1.01		0.620103	0.437332	0.846209	0.785893	0.744705	0.854631	0.322598	0.248338	0.294699	0.273753	0.887345	0.942048		1.0441	0.9906	1.0613	1.0717		100	100	100	100		Lipid	Sphingomyelins	100015789
3132			sphingomyelin (d17:1/14:0, d16:1/15:0)*	LC/MS pos late	62152					0.61	1.07	1.17	1.74	1.91	1.1		0.00285992	0.0186508	0.871747	0.785893	0.9667	0.882192	0.111948	0.13342	0.103383	0.14004	0.689549	0.920108		1.2356	0.758	1.3163	1.4463		100	100	86	100		Lipid	Sphingomyelins	100020276
3133			sphingomyelin (d18:1/14:0, d16:1/16:0)*	LC/MS pos late	42463		HMDB0012097	11433862		0.85	0.95	1.01	1.11	1.18	1.06		0.183334	0.218247	0.551573	0.726638	0.778537	0.85544	0.846601	0.436971	0.491687	0.360194	0.499901	0.870645		1.0817	0.9248	1.0255	1.088		100	100	100	100		Lipid	Sphingomyelins	100004328
3134			sphingomyelin (d18:2/14:0, d18:1/14:1)*	LC/MS pos late	47154		HMDB0240637 HMDB0240612			0.54	0.79	0.87	1.45	1.61	1.11		3.08472e-05	0.00232781	0.171269	0.579607	0.354489	0.72078	0.0776728	0.109368	0.0297252	0.0769851	0.366518	0.819254		1.2707	0.6918	1.001	1.1108		100	100	100	100		Lipid	Sphingomyelins	100005985
3135			sphingomyelin (d17:1/16:0, d18:1/15:0, d16:1/17:0)*	LC/MS pos late	52433		HMDB0240608 HMDB0240617			0.87	0.99	1	1.13	1.15	1.02		0.467175	0.383186	0.813031	0.78336	0.890304	0.875161	0.911167	0.457804	0.790367	0.464015	0.759175	0.925905		1.0977	0.9582	1.0853	1.103		100	100	100	100		Lipid	Sphingomyelins	100006314	121999-58-4
3136			sphingomyelin (d17:2/16:0, d18:2/15:0)*	LC/MS pos late	57483		HMDB0240677			0.71	0.88	0.91	1.24	1.29	1.04		0.00468151	0.0249793	0.390887	0.672368	0.415103	0.744374	0.953097	0.469699	0.948519	0.504501	0.982902	0.952937		1.2139	0.8603	1.0645	1.1056		100	100	100	86		Lipid	Sphingomyelins	100015793
3137			sphingomyelin (d18:2/16:0, d18:1/16:1)*	LC/MS pos late	42459		HMDB0240613 HMDB0240638			0.93	0.92	0.89	0.99	0.96	0.97		0.734479	0.469708	0.600926	0.739018	0.498322	0.760651	0.751862	0.412014	0.644404	0.414093	0.712234	0.920108		1.0638	0.9884	0.976	0.9509		100	100	100	100		Lipid	Sphingomyelins	100004329
3138			sphingomyelin (d18:1/17:0, d17:1/18:0, d19:1/16:0)	LC/MS pos late	52615		HMDB0240609 HMDB0240622 HMDB0240620	46891763		1.07	1.03	0.98	0.96	0.91	0.95		0.315858	0.301169	0.873283	0.785893	0.8776	0.872229	0.575483	0.348415	0.368744	0.307316	0.029886	0.672423		1.0222	1.0983	1.0537	1.0005		100	100	100	100		Lipid	Sphingomyelins	100008920	121999-64-2
3139			sphingomyelin (d18:1/18:1, d18:2/18:0)	LC/MS pos late	37529		HMDB0012101	6443882		1.08	1	0.95	0.93	0.88	0.95		0.332482	0.315313	0.870768	0.785893	0.728631	0.850944	0.49484	0.321036	0.313343	0.28257	0.109085	0.703731		0.9754	1.0511	0.9783	0.9264		100	100	100	100		Lipid	Sphingomyelins	100002106	108392-10-5
3140			sphingomyelin (d18:1/19:0, d19:1/18:0)*	LC/MS pos late	57475					0.79	0.95	0.97	1.21	1.24	1.02		0.0521757	0.0970464	0.651751	0.750909	0.702227	0.844845	0.636458	0.373931	0.594055	0.398585	0.797281	0.935671		1.1258	0.8861	1.073	1.0947		100	100	100	100		Lipid	Sphingomyelins	100015787
3141			sphingomyelin (d18:1/20:0, d16:1/22:0)*	LC/MS pos late	48490		HMDB0012102	44260124		0.83	0.93	0.98	1.11	1.18	1.06		0.0879722	0.132018	0.583602	0.734758	0.936767	0.87517	0.494592	0.321036	0.200601	0.215853	0.34307	0.81569		1.0718	0.8928	0.9941	1.0549		100	100	100	100		Lipid	Sphingomyelins	100006290
3142			sphingomyelin (d18:1/20:1, d18:2/20:0)*	LC/MS pos late	48491		HMDB0240610 HMDB0240632			0.87	0.92	0.97	1.05	1.11	1.05		0.314965	0.301169	0.62455	0.743608	0.948133	0.877636	0.707191	0.396565	0.406	0.321763	0.35492	0.81569		1.048	0.9152	0.9655	1.0169		100	100	100	100		Lipid	Sphingomyelins	100006292	222403-67-0
3143			sphingomyelin (d18:1/20:2, d18:2/20:1, d16:1/22:2)*	LC/MS pos late	57481					0.83	0.67	0.72	0.81	0.87	1.07		0.393345	0.345149	0.0725326	0.551308	0.145077	0.641688	0.114383	0.135183	0.459523	0.345251	0.898421	0.942048		1.2625	1.043	0.8499	0.9066		83	100	86	71		Lipid	Sphingomyelins	100006293
3144			sphingomyelin (d18:1/21:0, d17:1/22:0, d16:1/23:0)*	LC/MS pos late	52495		HMDB0240621 HMDB0240611 HMDB0240619			0.84	1.03	1.07	1.23	1.27	1.04		0.238546	0.25303	0.861611	0.785893	0.964632	0.882192	0.542488	0.339683	0.418088	0.327212	0.733081	0.923804		1.1145	0.9398	1.1515	1.1936		100	100	100	100		Lipid	Sphingomyelins	100009025
3145			sphingomyelin (d18:2/21:0, d16:2/23:0)*	LC/MS pos late	57480		HMDB0240676			0.78	0.94	1	1.2	1.28	1.06		0.282668	0.282255	0.769705	0.778124	0.895392	0.87517	0.398865	0.278915	0.372157	0.309135	0.667724	0.920108		1.0982	0.8575	1.0325	1.099		100	100	100	100		Lipid	Sphingomyelins	100015790
3146			sphingomyelin (d18:1/22:1, d18:2/22:0, d16:1/24:1)*	LC/MS pos late	48493		HMDB0012104			0.97	0.95	1.07	0.98	1.11	1.12		0.967975	0.533738	0.790984	0.778124	0.839731	0.868761	0.639371	0.373931	0.72265	0.439086	0.353325	0.81569		1.0967	1.0619	1.0451	1.1754		100	100	100	100		Lipid	Sphingomyelins	100006295
3147			sphingomyelin (d18:1/22:2, d18:2/22:1, d16:1/24:2)*	LC/MS pos late	57477		HMDB0240672 HMDB0240670 HMDB0240669			0.91	0.86	0.96	0.95	1.05	1.11		0.446776	0.374609	0.199012	0.579607	0.693702	0.843715	0.61957	0.368674	0.703563	0.433832	0.502652	0.870645		1.1142	1.0158	0.9632	1.0647		100	100	100	100		Lipid	Sphingomyelins	100006296
3148			sphingomyelin (d18:2/23:0, d18:1/23:1, d17:1/24:1)*	LC/MS pos late	52435		HMDB0240634 HMDB0011696 HMDB0240614	134757653		0.91	0.99	1.01	1.09	1.11	1.02		0.745839	0.470961	0.866753	0.785893	0.946997	0.877636	0.990389	0.47912	0.872483	0.485021	0.750732	0.923804		1.1393	1.0352	1.1258	1.1476		100	100	100	100		Lipid	Sphingomyelins	100008956
3149			sphingomyelin (d18:1/24:1, d18:2/24:0)*	LC/MS pos late	47153		HMDB0012107	44260126		0.99	0.89	0.9	0.9	0.92	1.02		0.796997	0.484469	0.636459	0.743899	0.702661	0.844845	0.352947	0.262644	0.460847	0.345251	0.699377	0.920108		1.1006	1.0846	0.9775	0.9926		100	100	100	100		Lipid	Sphingomyelins	100005986	94359-13-4
3150			sphingomyelin (d18:2/24:1, d18:1/24:2)*	LC/MS pos late	52437		HMDB0240636 HMDB0240615	85336023		0.97	0.95	0.99	0.98	1.01	1.04		0.992222	0.540896	0.948884	0.798344	0.849028	0.868761	0.933467	0.464325	0.873188	0.485021	0.58021	0.920108		1.0726	1.0435	1.019	1.0571		100	100	100	100		Lipid	Sphingomyelins	100008957
3151			sphingomyelin (d18:1/25:0, d19:0/24:1, d20:1/23:0, d19:1/24:0)*	LC/MS pos late	57478		HMDB0240671 HMDB0240675 HMDB0240673 HMDB0240674			0.88	0.99	0.89	1.12	1.01	0.9		0.604797	0.432754	0.892086	0.789259	0.61766	0.808754	0.565067	0.345263	0.982354	0.513714	0.481449	0.866632		1.0336	0.9129	1.0266	0.924		100	100	100	100		Lipid	Sphingomyelins	100015792
3154		Ceramide PEs	palmitoyl-sphingosine-phosphoethanolamine (d18:1/16:0)	LC/MS pos late	62984					0.87	1.14	1.14	1.32	1.31	0.99		0.757685	0.475222	0.637106	0.743899	0.949513	0.877636	0.413828	0.285412	0.622842	0.408626	0.475165	0.866632		0.8939	0.7755	1.0223	1.0149		83	86	86	57		Lipid	Ceramide PEs	100021162
3179		Sphingosines	sphingosine	LC/MS pos late	17747	C00319	HMDB0000252	5280335		1.42	0.86	1.84	0.61	1.3	2.14		0.0682023	0.115102	0.622724	0.742984	0.176913	0.648226	0.0404057	0.0744839	0.829404	0.477998	0.063936	0.703731		1.0832	1.5334	0.9302	1.9904		100	100	100	100		Lipid	Sphingosines	297	123-78-4
3181			sphingosine 1-phosphate	LC/MS polar	34445	C06124	HMDB0000277	5283560		1.61	0.93	1.16	0.58	0.72	1.24		0.00103068	0.0108661	0.665408	0.754438	0.659366	0.829943	0.00535512	0.03673	0.0985754	0.137956	0.341801	0.81569		0.8279	1.3299	0.7721	0.9603		100	100	100	100		Lipid	Sphingosines	100000626	26993-30-6
3187			hexadecasphingosine (d16:1)*	LC/MS pos late	57428			14767871		1.02	0.82	1.33	0.81	1.31	1.62		0.7949	0.483751	0.235202	0.579607	0.278673	0.690904	0.131797	0.147029	0.168815	0.19194	0.0177969	0.672423		1.0315	1.0479	0.844	1.3705		100	100	86	100		Lipid	Sphingosines	100015723
3195		Mevalonate Metabolism	3-hydroxy-3-methylglutarate	LC/MS polar	531	C03761	HMDB0000355	1662;5459993		1.32	1.11	1.05	0.84	0.8	0.95		0.382223	0.338198	0.48092	0.716434	0.625631	0.811838	0.564017	0.345263	0.414212	0.32576	0.281994	0.795136		1.3397	1.7654	1.4841	1.4097		100	100	100	100		Lipid	Mevalonate Metabolism	112	503-49-1
3197			mevalonate	LC/MS neg	39583	C02104	HMDB0000227	449		7.9	3.43	2.27	0.43	0.29	0.66		0.000196078	0.004708	0.219191	0.579607	0.404207	0.744374	0.00637517	0.0374316	0.00205322	0.0408052	0.479674	0.866632		0.62	4.8991	2.127	1.4045		100	100	100	100		Lipid	Mevalonate Metabolism	30	96949-03-0
3198			mevalonolactone	LC/MS pos early	48118		HMDB0006024	10428		8.29	3.47	2.24	0.42	0.27	0.64		4.30788e-05	0.00284448	0.199305	0.579607	0.349895	0.72078	0.00499546	0.03673	0.000353928	0.0408052	0.478823	0.866632		0.5892	4.8836	2.0455	1.3189		100	100	100	100		Lipid	Mevalonate Metabolism	100000772	674-26-0
3211		Sterol	desmosterol	LC/MS pos late	6065	C01802	HMDB0002719	439577		1.91	1.4	0.76	0.73	0.4	0.54		0.0622497	0.108167	0.962811	0.798344	0.21331	0.666241	0.115113	0.135183	0.00215409	0.0408052	0.0890072	0.703731		1.041	1.984	1.4536	0.7903		100	100	86	43		Lipid	Sterol	306	313-04-2
3212			cholesterol	LC/MS pos late	63	C00187	HMDB0000067	6432564;11025495;5997		0.67	0.81	0.8	1.2	1.19	0.99		0.0225249	0.0621522	0.328714	0.633259	0.298868	0.705706	0.390464	0.276157	0.568748	0.387898	0.727669	0.923804		1.3233	0.8861	1.0666	1.0542		100	100	100	100		Lipid	Sterol	266	57-88-5
3213			cholesterol sulfate	LC/MS polar	35324	C18043	HMDB00653	65076		0.73	1.28	1.1	1.76	1.51	0.86		0.300383	0.293839	0.668206	0.754438	0.912493	0.87517	0.0322463	0.0681569	0.0996746	0.138373	0.440246	0.849565		0.9535	0.6952	1.2252	1.0491		100	100	100	100		Lipid	Sterol	100001606	2864-50-8
3226			7alpha-hydroxy-3-oxo-4-cholestenoate (7-Hoca)	LC/MS neg	36776	C17337	HMDB0012458	3081085		1.52	1.4	1.23	0.92	0.81	0.88		0.010974	0.0425646	0.0319217	0.519117	0.134629	0.638125	0.455826	0.303795	0.0520419	0.100162	0.392212	0.825559		0.834	1.2668	1.1703	1.0271		100	100	100	100		Lipid	Sterol	100001609	115538-85-7
3229			3beta-hydroxy-5-cholestenoate	LC/MS neg	54805	C17333	HMDB0012453	165511		1.02	0.57	0.53	0.56	0.52	0.92		0.834324	0.495324	0.198169	0.579607	0.10295	0.617178	0.151963	0.161327	0.109155	0.143601	0.511646	0.876431		1.4759	1.5016	0.8446	0.7799		83	100	86	86		Lipid	Sterol	100006370	6561-58-6
3239			4-cholesten-3-one	LC/MS pos late	38125	C00599	HMDB0000921	91477		0.65	0.88	0.67	1.37	1.03	0.75		0.0426141	0.0887367	0.532003	0.726638	0.0876651	0.577955	0.15243	0.161456	0.931111	0.500457	0.249265	0.782573		1.1505	0.7427	1.0151	0.7657		100	86	100	71		Lipid	Sterol	100002227	601-57-0
3241			beta-sitosterol	LC/MS pos late	27414	C01753	HMDB0000852	222284		0.37	0.43	0.55	1.16	1.5	1.29		0.0590164	0.10532	0.098073	0.551308	0.267621	0.683971	0.670607	0.38366	0.0350029	0.0810628	0.0387986	0.672423		1.4731	0.5421	0.631	0.8114		100	86	86	100		Lipid	Sterol	100001033	83-46-5
3244			campesterol	LC/MS pos late	33997	C01789	HMDB0002869	173183		0.51	0.59	0.72	1.16	1.42	1.22		0.0162884	0.0535337	0.0962453	0.551308	0.1194	0.638125	0.891375	0.452366	0.0470408	0.0963938	0.192938	0.738344		1.5118	0.7671	0.891	1.0874		100	100	100	100		Lipid	Sterol	100001269	474-62-4
3263		Pregnenolone Steroids	pregnenolone sulfate	LC/MS neg	38170	C18044	HMDB0000774	105074		1.16	0.47	0.48	0.4	0.41	1.01		0.303769	0.295693	0.320446	0.625888	0.247592	0.682672	0.079842	0.110146	0.0791232	0.122072	0.634969	0.920108		0.7417	0.8595	0.348	0.3526		50	86	43	43		Lipid	Pregnenolone Steroids	100002129	1247-64-9
3291		Progestin Steroids	5alpha-pregnan-3beta,20beta-diol monosulfate (1)	LC/MS neg	37196		HMDB0240580			1.72	0.58	0.72	0.34	0.42	1.24		0.0101984	0.0414397	0.961478	0.798344	0.733097	0.852703	0.00742755	0.0378015	0.00494672	0.0443921	0.287215	0.795136		1.2962	2.2257	0.7527	0.9326		58	100	100	100		Lipid	Progestin Steroids	100002009
3321		Corticosteroids	11-dehydrocorticosterone	LC/MS neg	39779	C05490	HMDB0004029	6290		2.1	1.58	1.53	0.75	0.73	0.97		0.0115419	0.0441801	0.107586	0.551308	0.330054	0.72078	0.0953102	0.12098	0.125175	0.156873	0.39771	0.825559		0.6925	1.4562	1.0969	1.0587		75	100	100	100		Lipid	Corticosteroids	100002781	72-23-1
3325			cortisol	LC/MS pos early	1712	C00735	HMDB0000063	5754		2.78	1.89	2.11	0.68	0.76	1.11		0.00278688	0.0185196	0.243783	0.587269	0.112304	0.638125	0.0904784	0.119727	0.162584	0.186536	0.355824	0.81569		0.5799	1.6126	1.0955	1.2208		100	100	100	100		Lipid	Corticosteroids	356	50-23-7
3335			cortisone	LC/MS neg	1769	C00762	HMDB0002802	222786		3.24	1.14	1.26	0.35	0.39	1.11		0.000301245	0.00589367	0.755852	0.778124	0.723984	0.849177	0.000876207	0.0274573	0.0079616	0.0470715	0.818329	0.936236		0.5913	1.9185	0.6741	0.7461		67	100	71	71		Lipid	Corticosteroids	273	53-06-5
3473		Primary Bile Acid Metabolism	cholate	LC/MS neg	22842	C00695	HMDB0000619	221493		0.05	0.21	0.2	4.57	4.32	0.95		0.0190742	0.0562887	0.706511	0.768423	0.35863	0.72078	0.0285161	0.0634297	0.0938543	0.134761	0.487982	0.869177		13.1708	0.6092	2.7811	2.6325		83	57	100	86		Lipid	Primary Bile Acid Metabolism	136	81-25-4
3475			taurocholate	LC/MS neg	18497	C05122	HMDB0000036	46783527;6675		0.22	0.31	0.44	1.41	2.02	1.43		0.0813414	0.12788	0.340194	0.640672	0.318035	0.72078	0.140333	0.152632	0.465958	0.346656	0.839877	0.94052		4.2949	0.9426	1.3316	1.905		100	100	100	100		Lipid	Primary Bile Acid Metabolism	1648	145-42-6
3481			glycochenodeoxycholate	LC/MS neg	32346	C05466	HMDB0000637	12544		0.22	0.39	1.15	1.75	5.13	2.94		0.338801	0.320156	0.955884	0.798344	0.769809	0.854631	0.290635	0.232067	0.355918	0.300778	0.750482	0.923804		1.2525	0.2811	0.4907	1.4433		8	14	43	14		Lipid	Primary Bile Acid Metabolism	1628	16564-43-5
3482			taurochenodeoxycholate	LC/MS neg	18494	C05465	HMDB0000951	387316		0.2	0.43	0.52	2.14	2.59	1.21		0.0509435	0.0961014	0.422239	0.681928	0.513654	0.772019	0.0123296	0.0464461	0.177321	0.197588	0.907817	0.942048		4.3975	0.8797	1.8806	2.2741		92	86	100	100		Lipid	Primary Bile Acid Metabolism	1629	6009-98-9
3499		Secondary Bile Acid Metabolism	deoxycholate	LC/MS neg	1114	C04483	HMDB0000626	222528;440355		0.43	0.67	0.6	1.56	1.4	0.9		0.695259	0.459652	0.0679951	0.551308	0.174827	0.648226	0.107319	0.130208	0.0173833	0.0663066	0.502364	0.870645		1.856	0.7992	1.2457	1.119		67	100	100	100		Lipid	Secondary Bile Acid Metabolism	302	83-44-3
3509			taurodeoxycholate	LC/MS neg	12261	C05463	HMDB0000896	2733768		0.14	0.29	0.61	2.01	4.3	2.14		0.197891	0.228719	0.898182	0.789259	0.994313	0.887233	0.0174394	0.0527163	0.0767856	0.120656	0.853844	0.942048		7.044	0.9996	2.0096	4.2934		75	86	100	86		Lipid	Secondary Bile Acid Metabolism	1668	207737-97-1
3510			taurodeoxycholic acid 3-sulfate	LC/MS neg	62889					0.61	0.54	0.51	0.89	0.83	0.93		0.82696	0.493594	0.882111	0.786109	0.844256	0.868761	0.624201	0.370274	0.5221	0.372936	0.940865	0.94919		2.4631	1.5054	1.3373	1.2495		83	86	100	86		Lipid	Secondary Bile Acid Metabolism	100006644
3522			taurolithocholate 3-sulfate	LC/MS neg	36850	C03642	HMDB0002580	440071		0.98	0.86	0.73	0.88	0.74	0.85		0.524086	0.40474	0.678026	0.759695	0.755375	0.854631	0.72241	0.402202	0.646519	0.414093	0.839056	0.94052		1.5748	1.5476	1.3566	1.1512		100	100	100	100		Lipid	Secondary Bile Acid Metabolism	100001658	64936-83-0
3524			ursodeoxycholate	LC/MS neg	1605	C07880	HMDB0000946	31401		0.51	1.39	0.83	2.73	1.63	0.6		0.252643	0.263226	0.112826	0.551308	0.677649	0.837823	0.0190574	0.0540092	0.041553	0.0892407	0.139983	0.734339		1.1392	0.5791	1.5821	0.945		58	71	100	71		Lipid	Secondary Bile Acid Metabolism	1135	128-13-2
3550			glycohyodeoxycholate	LC/MS neg	43501			114611		1	1	1	1	1	1															1	1	1	1		8	0	0	0		Lipid	Secondary Bile Acid Metabolism	100003868	13042-33-6
3556			taurocholenate sulfate*	LC/MS neg	32807					1.35	0.61	0.58	0.45	0.43	0.96		0.280409	0.281601	0.552365	0.726638	0.492278	0.757005	0.0562351	0.0902686	0.0885122	0.130063	0.856583	0.942048		1.3545	1.825	0.8212	0.7892		75	86	71	71		Lipid	Secondary Bile Acid Metabolism	100001990
3557			7-ketodeoxycholate	LC/MS neg	31904		HMDB0000391	188292		0.24	0.6	0.56	2.48	2.32	0.94		0.0751859	0.121274	0.372729	0.669085	0.401787	0.744374	0.56751	0.346073	0.509348	0.36731	0.950046	0.950247		1.03	0.2481	0.6144	0.5757		42	29	29	29		Lipid	Secondary Bile Acid Metabolism	100001063	911-40-0
3561			taurochenodeoxycholic acid 3-sulfate	LC/MS neg	62890		HMDB0002486	52931550		0.46	0.34	0.36	0.72	0.78	1.07		0.34351	0.321333	0.369709	0.669085	0.486068	0.755964	0.687668	0.391253	0.664357	0.420154	0.798751	0.935671		2.539	1.177	0.8516	0.9138		83	71	86	71		Lipid	Secondary Bile Acid Metabolism	100021093
3566			ursocholate	LC/MS neg	57573	C17644	HMDB0000917	122340		0.14	2.32	0.13	16.59	0.95	0.06		0.048163	0.0933221	0.864593	0.785893	0.0399601	0.577955	0.27787	0.226522	0.355918	0.300778	0.249243	0.782573		0.495	0.0693	1.1495	0.066		33	14	43	0		Lipid	Secondary Bile Acid Metabolism	100002913	2955-27-3
4139	Nucleotide	Purine Metabolism, (Hypo)Xanthine/Inosine containing	inosine	LC/MS neg	1123	C00294	HMDB0000195	6021		1.25	1.06	0.85	0.85	0.68	0.8		0.0354289	0.08011	0.969246	0.800846	0.386325	0.738651	0.192173	0.183572	0.0216487	0.0724022	0.03781	0.672423		0.9677	1.2051	1.0231	0.8229		100	100	100	100		Nucleotide	Purine Metabolism, (Hypo)Xanthine/Inosine containing	361	58-63-9
4140			hypoxanthine	LC/MS neg	3127	C00262	HMDB0000157	790;135398638		1.82	1.05	1.63	0.58	0.89	1.55		0.000639312	0.00898899	0.791818	0.778124	0.155889	0.648226	0.0114617	0.0447096	0.382806	0.312694	0.139648	0.734339		0.8004	1.4597	0.8425	1.3047		100	100	100	100		Nucleotide	Purine Metabolism, (Hypo)Xanthine/Inosine containing	171	68-94-0
4141			xanthine	LC/MS polar	3147	C00385	HMDB0000292	1188		3.71	2.19	2.34	0.59	0.63	1.07		0.00462747	0.0249429	0.139449	0.551308	0.00462896	0.491602	0.169038	0.16949	0.368262	0.307316	0.241995	0.770853		0.6882	2.5557	1.5095	1.609		100	100	100	100		Nucleotide	Purine Metabolism, (Hypo)Xanthine/Inosine containing	1004	69-89-6
4146			N1-methylinosine	LC/MS pos early	48351		HMDB0002721	650095		0.68	0.73	0.7	1.06	1.03	0.97		0.0301296	0.0740259	0.0646402	0.551308	0.0590234	0.577955	0.524932	0.332704	0.938365	0.50114	0.496327	0.870645		1.309	0.8962	0.9492	0.9207		100	100	100	100		Nucleotide	Purine Metabolism, (Hypo)Xanthine/Inosine containing	100001409	20245-33-4
4147			2'-deoxyinosine	LC/MS neg	15076	C05512	HMDB0000071	135398593		3.48	1.82	2.38	0.52	0.69	1.31		0.00186564	0.0137374	0.550428	0.726638	0.149041	0.647259	0.0951421	0.12098	0.0798496	0.122342	0.502212	0.870645		0.8444	2.9365	1.5368	2.0135		100	100	100	100		Nucleotide	Purine Metabolism, (Hypo)Xanthine/Inosine containing	100000135	890-38-0
4151			urate	LC/MS neg	1604	C00366	HMDB0000289	1175		1.43	1.11	1.81	0.78	1.27	1.64		0.903592	0.519381	0.851046	0.785893	0.12137	0.638125	0.961339	0.472689	0.407092	0.321763	0.181373	0.734339		0.9409	1.3422	1.0403	1.7041		100	100	100	100		Nucleotide	Purine Metabolism, (Hypo)Xanthine/Inosine containing	1134	69-93-2;120K5305
4153			allantoin	LC/MS polar	1107	C02350 C02348 C01551	HMDB0000462	204;439714;439713		0.75	0.83	1.02	1.12	1.37	1.23		0.0958909	0.141489	0.309509	0.620283	0.628274	0.814045	0.115181	0.135183	0.021453	0.0723565	0.0531339	0.703731		1.2253	0.9144	1.0204	1.2513		100	100	100	100		Nucleotide	Purine Metabolism, (Hypo)Xanthine/Inosine containing	1002	97-59-6
4154			allantoic acid	LC/MS polar	33434	C00499	HMDB0001209	203		0.54	0.73	0.9	1.35	1.67	1.23		0.0427152	0.0887367	0.462332	0.707393	0.81772	0.868171	0.00421236	0.03673	0.00130105	0.0408052	0.107549	0.703731		1.4635	0.7851	1.0628	1.3102		100	100	100	100		Nucleotide	Purine Metabolism, (Hypo)Xanthine/Inosine containing	218	99-16-1
4159		Purine Metabolism, Adenine containing	adenosine 5'-monophosphate (AMP)	LC/MS pos early	32342	C00020	HMDB0000045	6083		0.71	0.97	0.98	1.37	1.39	1.01		0.344	0.321333	0.517111	0.720287	0.719652	0.849177	0.0351561	0.0698804	0.103996	0.140491	0.803409	0.935671		1.0985	0.7753	1.0646	1.0787		92	86	100	100		Nucleotide	Purine Metabolism, Adenine containing	209	149022-20-8
4166			adenosine	LC/MS pos early	555	C00212	HMDB0000050	60961		0.91	0.86	1.05	0.94	1.16	1.23		0.718148	0.466035	0.588359	0.735252	0.483348	0.755964	0.878344	0.4484	0.331357	0.290109	0.135771	0.734339		1.0034	0.9104	0.8601	1.0568		92	71	71	100		Nucleotide	Purine Metabolism, Adenine containing	798	58-61-7
4167			adenine	LC/MS pos early	554	C00147	HMDB0000034	190		1.14	1.04	0.74	0.91	0.65	0.71		0.484474	0.387753	0.764655	0.778124	0.118919	0.638125	0.658044	0.379671	0.113728	0.147238	0.041558	0.672423		1.1028	1.259	1.1509	0.8183		100	100	100	100		Nucleotide	Purine Metabolism, Adenine containing	880	73-24-5
4173			N1-methyladenosine	LC/MS pos early	15650	C02494	HMDB0003331	27476		0.92	0.82	0.81	0.9	0.88	0.98		0.549524	0.417068	0.20408	0.579607	0.169756	0.648226	0.11647	0.136011	0.0440708	0.0923572	0.464596	0.866632		1.1502	1.0546	0.9472	0.927		100	100	100	100		Nucleotide	Purine Metabolism, Adenine containing	1242	15763-06-1
4174			N6-methyladenosine	LC/MS pos early	37114		HMDB0004044	102175		0.86	0.89	0.94	1.03	1.09	1.06		0.163794	0.204543	0.300289	0.618792	0.49581	0.760651	0.895674	0.452928	0.559883	0.38501	0.64836	0.920108		1.0597	0.9135	0.9412	0.996		100	100	100	100		Nucleotide	Purine Metabolism, Adenine containing	213	1867-73-8
4184			N6-carbamoylthreonyladenosine	LC/MS neg	35157		HMDB0041623	161466		0.81	0.73	0.7	0.9	0.87	0.97		0.426422	0.364485	0.144014	0.551308	0.114324	0.638125	0.239328	0.206642	0.177201	0.197588	0.413432	0.836554		1.2692	1.0285	0.9225	0.8911		100	100	100	100		Nucleotide	Purine Metabolism, Adenine containing	100001415	24719-82-2
4194			N6-succinyladenosine	LC/MS neg	48130		HMDB0000912	165243		0.62	0.49	0.48	0.79	0.77	0.97		0.216272	0.240006	0.0273896	0.519117	0.0200566	0.495239	0.155623	0.162625	0.0712893	0.117463	0.647954	0.920108		1.3929	0.8702	0.6888	0.6668		75	71	57	14		Nucleotide	Purine Metabolism, Adenine containing	100001664	4542-23-8
4202		Purine Metabolism, Guanine containing	guanosine	LC/MS neg	1573	C00387	HMDB0000133	6802		1.09	1.02	0.88	0.93	0.81	0.87		0.413642	0.355865	0.826898	0.785893	0.50081	0.760651	0.403221	0.2807	0.167781	0.191197	0.262795	0.782573		1.0733	1.1714	1.0895	0.9447		100	100	100	100		Nucleotide	Purine Metabolism, Guanine containing	1099	118-00-3
4203			guanine	LC/MS pos early	32352	C00242	HMDB0000132	135398634		2.37	1.32	2.21	0.56	0.93	1.68		0.000117406	0.00344547	0.40681	0.680312	0.069203	0.577955	0.017892	0.0532048	0.431544	0.333576	0.143383	0.734339		0.72	1.7076	0.9485	1.5926		100	100	100	100		Nucleotide	Purine Metabolism, Guanine containing	172	73-40-5
4206			7-methylguanine	LC/MS pos early	35114	C02242	HMDB0000897	135398679		0.84	0.88	0.85	1.04	1.01	0.97		0.0401739	0.0862657	0.086418	0.551308	0.0567464	0.577955	0.358823	0.263125	0.804724	0.468295	0.283517	0.795136		1.138	0.9596	0.9985	0.9715		100	100	100	100		Nucleotide	Purine Metabolism, Guanine containing	100001456	578-76-7
4212			N2,N2-dimethylguanosine	LC/MS pos early	35137		HMDB0004824	135501639		1.42	0.93	1.06	0.65	0.75	1.15		0.0643918	0.110436	0.59743	0.738422	0.978737	0.882192	0.00210052	0.0274573	0.0478792	0.0965793	0.50524	0.872892		1.0174	1.448	0.9419	1.0809		100	100	86	100		Nucleotide	Purine Metabolism, Guanine containing	100001412	2140-67-2
4213			N2,N2-dimethylguanine	LC/MS pos early	37081			135418794		0.41	0.59	0.56	1.44	1.36	0.94		0.010469	0.0421651	0.229969	0.579607	0.15614	0.648226	0.0225109	0.0574597	0.0304093	0.0771789	0.215369	0.743264		1.7992	0.739	1.0678	1.0054		100	100	100	100		Nucleotide	Purine Metabolism, Guanine containing	100001853	1445-15-4
4220			2'-deoxyguanosine	LC/MS neg	1411	C00330	HMDB0000085	135398592		3.4	1.9	2.34	0.56	0.69	1.23		0.00221769	0.0158307	0.494162	0.716481	0.164642	0.648226	0.117225	0.136487	0.0441167	0.0923572	0.590142	0.920108		0.8173	2.78	1.5515	1.9115		92	100	100	100		Nucleotide	Purine Metabolism, Guanine containing	348	961-07-9
4227		Pyrimidine Metabolism, Orotate containing	orotate	LC/MS polar	1505	C00295	HMDB0000226	967		0.95	0.87	0.81	0.91	0.85	0.93		0.806369	0.487362	0.554183	0.726638	0.374309	0.736869	0.260747	0.218006	0.31375	0.28257	0.540665	0.891693		1.3524	1.2915	1.1789	1.0938		100	100	100	100		Nucleotide	Pyrimidine Metabolism, Orotate containing	445	50887-69-9
4229			orotidine	LC/MS polar	35172		HMDB0000788	92751		0.6	0.64	0.7	1.07	1.18	1.11		0.0833538	0.129122	0.164846	0.579607	0.284403	0.695086	0.912269	0.457804	0.485103	0.357984	0.0827533	0.703731		1.3355	0.7977	0.85	0.9395		100	100	100	100		Nucleotide	Pyrimidine Metabolism, Orotate containing	100001416	314-50-1
4239		Pyrimidine Metabolism, Uracil containing	uridine	LC/MS neg	606	C00299	HMDB0000296	6029		0.89	0.66	1.68	0.74	1.88	2.55		0.304005	0.295693	0.117861	0.551308	0.897985	0.87517	0.777047	0.417206	0.494301	0.36106	0.20421	0.743264		1.308	1.1665	0.8609	2.1965		100	100	100	100		Nucleotide	Pyrimidine Metabolism, Uracil containing	535	58-96-8
4240			uracil	LC/MS polar	605	C00106	HMDB0000300	1174		2.3	1.13	1.42	0.49	0.62	1.26		0.000354976	0.00661344	0.556603	0.726638	0.21865	0.667379	0.00713811	0.0378015	0.0642338	0.111697	0.473885	0.866632		0.6805	1.5672	0.7712	0.9696		100	100	100	100		Nucleotide	Pyrimidine Metabolism, Uracil containing	825	66-22-8
4241			pseudouridine	LC/MS neg	33442	C02067	HMDB0000767	15047		0.7	0.75	0.73	1.07	1.05	0.99		0.0630831	0.109255	0.137158	0.551308	0.11864	0.638125	0.392963	0.277278	0.371031	0.30871	0.740476	0.923804		1.3713	0.9583	1.022	1.0079		100	100	100	100		Nucleotide	Pyrimidine Metabolism, Uracil containing	821	1445-07-4
4242			5,6-dihydrouridine	LC/MS neg	61833		HMDB0000497	94312		0.65	0.7	0.7	1.09	1.09	1		0.0701045	0.11682	0.165615	0.579607	0.164356	0.648226	0.237033	0.20542	0.223502	0.230637	0.940598	0.94919		1.4529	0.9386	1.0207	1.0211		100	100	100	100		Nucleotide	Pyrimidine Metabolism, Uracil containing	100001425	5627-05-04
4243			2'-O-methyluridine	LC/MS neg	57655		HMDB0240328	102212		1.07	0.82	1.02	0.77	0.96	1.24		0.516128	0.400938	0.337786	0.640672	0.919043	0.87517	0.000315464	0.0181999	0.399449	0.320162	0.0986668	0.703731		1.0566	1.1288	0.871	1.0798		100	100	100	100		Nucleotide	Pyrimidine Metabolism, Uracil containing	100010896	2140-76-3
4255			2'-deoxyuridine	LC/MS neg	52602	C00526	HMDB0000012	13712		2.7	1.24	1.85	0.46	0.68	1.49		0.00589137	0.0299235	0.729026	0.773858	0.121682	0.638125	0.0114766	0.0447096	0.213979	0.223825	0.119423	0.711613		0.9316	2.5167	1.1588	1.7229		100	100	100	100		Nucleotide	Pyrimidine Metabolism, Uracil containing	536	951-78-0
4256			4-ureidobutyrate	LC/MS pos early	22118			1571307		0.69	0.69	0.72	0.99	1.03	1.04		0.141119	0.182261	0.137237	0.551308	0.189905	0.652763	0.953247	0.469699	0.6395	0.414093	0.691755	0.920108		1.4048	0.9759	0.9706	1.0062		100	100	100	100		Nucleotide	Pyrimidine Metabolism, Uracil containing	100000718	2609-10-01
4257			3-ureidoisobutyrate	LC/MS polar	57549	C05100	HMDB0002031	160663		1.03	0.96	0.94	0.94	0.92	0.98		0.882012	0.513535	0.790758	0.778124	0.638871	0.818713	0.339542	0.258735	0.237807	0.242412	0.476071	0.866632		1.0151	1.0456	0.9792	0.9569		100	100	100	100		Nucleotide	Pyrimidine Metabolism, Uracil containing	100001531	2905-86-4
4258			3-ureidopropionate	LC/MS pos early	3155	C02642	HMDB0000026	111		1.29	1.07	1.04	0.83	0.8	0.97		0.0840886	0.129501	0.710972	0.768423	0.88366	0.872229	0.0441437	0.0772289	0.0292502	0.0765436	0.611518	0.920108		0.9251	1.197	0.9923	0.9599		100	100	100	100		Nucleotide	Pyrimidine Metabolism, Uracil containing	1053	462-88-4
4259			beta-alanine	LC/MS pos early	55	C00099	HMDB0000056	239		1.22	0.99	1.19	0.81	0.98	1.2		0.0859223	0.130799	0.846945	0.785893	0.43926	0.74548	0.225023	0.199413	0.62001	0.408626	0.397708	0.825559		1.0044	1.2299	0.9979	1.1998		100	100	100	100		Nucleotide	Pyrimidine Metabolism, Uracil containing	244	56-41-7;107-95-9
4261			N-acetyl-beta-alanine	LC/MS neg	37432	C01073	HMDB0061880	76406		0.9	0.99	1.37	1.1	1.54	1.39		0.790696	0.482862	0.844474	0.785893	0.082563	0.577955	0.98203	0.477336	0.122487	0.154274	0.125328	0.724053		1.0904	0.9764	1.0773	1.4989		100	100	100	100		Nucleotide	Pyrimidine Metabolism, Uracil containing	100002102	3025-95-4
4264			3-(3-amino-3-carboxypropyl)uridine*	LC/MS neg	62924			171198		0.79	0.71	0.73	0.9	0.93	1.03		0.507854	0.397413	0.224924	0.579607	0.2947	0.705044	0.423266	0.288211	0.55682	0.384908	0.807137	0.935671		1.3197	1.0399	0.9391	0.9684		100	100	100	100		Nucleotide	Pyrimidine Metabolism, Uracil containing	100001426	52745-94-5
4271		Pyrimidine Metabolism, Cytidine containing	cytidine	LC/MS pos early	514	C00475	HMDB0000089	6175		1.28	1.18	1.35	0.92	1.05	1.14		0.0974405	0.142977	0.82579	0.785893	0.355633	0.72078	0.322708	0.248338	0.775888	0.460354	0.529637	0.884446		0.8769	1.1206	1.036	1.1818		100	100	100	100		Nucleotide	Pyrimidine Metabolism, Cytidine containing	827	65-46-3
4272			cytosine	LC/MS pos early	573	C00380	HMDB0000630	597		0.38	1.26	1.43	3.31	3.76	1.14		0.0446069	0.0899982	0.410231	0.680312	0.574175	0.794827	0.00161645	0.0274573	0.0196925	0.0701875	0.951524	0.950247		1.1692	0.4455	1.4762	1.6759		92	71	100	100		Nucleotide	Pyrimidine Metabolism, Cytidine containing	881	71-30-7
4275			5-methylcytidine	LC/MS neg	22119		HMDB0000982	92918		0.91	2.05	1.32	2.25	1.45	0.64		0.81355	0.489462	0.2261	0.579607	0.138386	0.638125	0.121196	0.137742	0.106783	0.141219	0.714281	0.920941		1.2696	1.1557	2.6017	1.6708		100	100	100	100		Nucleotide	Pyrimidine Metabolism, Cytidine containing	100000763	2140-61-6
4276			N4-acetylcytidine	LC/MS pos early	35130		HMDB0005923	107461		0.66	0.58	0.53	0.89	0.8	0.9		0.635651	0.444495	0.288592	0.61533	0.170173	0.648226	0.260891	0.218006	0.148673	0.176632	0.183459	0.734339		1.7311	1.14	1.0114	0.9133		100	100	100	100		Nucleotide	Pyrimidine Metabolism, Cytidine containing	100001413	3768-18-1
4277			5-hydroxymethylcytosine	LC/MS pos early	37434			70751		0.98	1.36	1.27	1.39	1.3	0.93		0.991264	0.540896	0.0710962	0.551308	0.203043	0.662551	0.171287	0.170843	0.181084	0.199569	0.48095	0.866632		0.7812	0.7634	1.0639	0.9931		67	57	100	100		Nucleotide	Pyrimidine Metabolism, Cytidine containing	100001940	1123-95-1
4278			5-methylcytosine	LC/MS pos early	21106	C02376	HMDB0002894	65040		0.55	0.85	1.03	1.54	1.87	1.21		0.0393963	0.0862657	0.708183	0.768423	0.868539	0.868761	0.0628664	0.0965214	0.0555005	0.103584	0.633737	0.920108		1.2791	0.7089	1.0906	1.3221		92	100	100	100		Nucleotide	Pyrimidine Metabolism, Cytidine containing	1049	58366-64-6
4282			2'-deoxycytidine	LC/MS pos early	15949	C00881	HMDB0000014	13711		0.83	1.49	1.27	1.8	1.54	0.86		0.453726	0.377441	0.39198	0.672368	0.0916199	0.577955	0.165961	0.168161	0.0275748	0.0745199	0.800007	0.935671		1.072	0.8869	1.5933	1.3662		100	100	100	100		Nucleotide	Pyrimidine Metabolism, Cytidine containing	100000125	951-77-9
4284			2'-O-methylcytidine	LC/MS pos early	57554			150971		1.11	1.02	1.16	0.92	1.05	1.14		0.498631	0.395489	0.736724	0.773858	0.469688	0.755964	0.277119	0.226304	0.766588	0.456995	0.372487	0.819254		0.9479	1.0477	0.9668	1.0991		100	100	100	100		Nucleotide	Pyrimidine Metabolism, Cytidine containing	100010895	2140-72-9
4285			5-methyl-2'-deoxycytidine	LC/MS pos early	38159	C03592	HMDB0002224	440055		0.88	1.29	1.7	1.47	1.94	1.32		0.520184	0.402904	0.224391	0.579607	0.029982	0.552106	0.00240905	0.027883	0.0108893	0.0556562	0.159101	0.734339		0.9942	0.8726	1.2853	1.6915		100	100	100	100		Nucleotide	Pyrimidine Metabolism, Cytidine containing	100002300	838-07-3
4286			5-hydroxymethylcytidine	LC/MS neg	54737			68576529		1.08	0.88	0.55	0.81	0.51	0.63		0.477922	0.386609	0.573	0.730901	0.921066	0.87517	0.770134	0.415884	0.227116	0.233543	0.339702	0.81569		2.0424	2.1994	1.7913	1.1228		100	100	100	100		Nucleotide	Pyrimidine Metabolism, Cytidine containing	100005934	19235-17-7
4287			5-hydroxymethyl-2'-deoxycytidine	LC/MS neg	57654			71749131;169016		1.3	1.25	1.26	0.96	0.97	1.01		0.0274599	0.0704142	0.022653	0.519117	0.0576067	0.577955	0.612405	0.365342	0.810403	0.470283	0.988625	0.953784		0.8843	1.1478	1.1065	1.1173		100	100	100	100		Nucleotide	Pyrimidine Metabolism, Cytidine containing	100010957	7226-77-9
4294		Pyrimidine Metabolism, Thymine containing	thymidine	LC/MS neg	2183	C00214	HMDB0000273	5789		2.38	1.31	2.12	0.55	0.89	1.62		0.0294934	0.0731433	0.74103	0.773858	0.197909	0.662551	0.157444	0.163082	0.389721	0.314943	0.459249	0.86083		0.922	2.1986	1.2124	1.9582		100	100	100	100		Nucleotide	Pyrimidine Metabolism, Thymine containing	872	50-89-5
4303			3-aminoisobutyrate	LC/MS pos early	1566	C05145	HMDB0002166	64956		3.02	2.98	4.63	0.99	1.54	1.56		0.0341173	0.0793922	0.104001	0.551308	0.0500659	0.577955	0.461928	0.306931	0.796434	0.465402	0.219834	0.743624		1.1429	3.446	3.4044	5.2965		100	100	100	100		Nucleotide	Pyrimidine Metabolism, Thymine containing	1114	10569-72-9;214139-20-5
4320	Cofactors and Vitamins	Nicotinate and Nicotinamide Metabolism	quinolinate	LC/MS polar	1899	C03722	HMDB0000232	1066		0.86	0.68	0.85	0.78	0.99	1.26		0.996539	0.542297	0.267607	0.595292	0.948215	0.877636	0.154459	0.162625	0.886834	0.486284	0.164781	0.734339		1.3662	1.1783	0.9241	1.1646		75	100	100	100		Cofactors and Vitamins	Nicotinate and Nicotinamide Metabolism	182	89-00-9
4322			nicotinate ribonucleoside	LC/MS pos early	33471	C05841	HMDB0006809	161233		0.75	0.35	0.72	0.47	0.97	2.08		0.548453	0.417068	0.0186958	0.519117	0.515488	0.773429	0.196263	0.184461	0.975599	0.512314	0.175893	0.734339		1.3062	0.9754	0.4554	0.9456		67	43	14	43		Cofactors and Vitamins	Nicotinate and Nicotinamide Metabolism	100001316	2625-49-2
4324			nicotinamide	LC/MS pos early	594	C00153	HMDB0001406	936		0.75	0.6	1.25	0.8	1.67	2.08		0.755649	0.475193	0.206222	0.579607	0.197179	0.662551	0.15397	0.162625	0.125598	0.157013	0.0400477	0.672423		1.3396	1.0014	0.8042	1.6722		100	100	100	100		Cofactors and Vitamins	Nicotinate and Nicotinamide Metabolism	432	98-92-0
4326			nicotinamide ribonucleotide (NMN)	LC/MS pos early	22152	C00455	HMDB0000229	14180		1.03	0.66	1.24	0.64	1.2	1.89		0.979666	0.536357	0.309625	0.620283	0.554027	0.782356	0.112615	0.133852	0.639655	0.414093	0.216143	0.743264		0.7769	0.7983	0.5097	0.9613		50	43	14	71		Cofactors and Vitamins	Nicotinate and Nicotinamide Metabolism	1312	1094-61-7
4327			nicotinamide riboside	LC/MS pos early	33013	C03150	HMDB0000855	439924		0.94	0.88	1.01	0.94	1.08	1.15		0.666853	0.451033	0.760589	0.778124	0.589205	0.801364	0.372009	0.268578	0.774613	0.460141	0.262746	0.782573		1.0819	1.0139	0.9525	1.0916		100	100	100	100		Cofactors and Vitamins	Nicotinate and Nicotinamide Metabolism	100001310	1341-23-7
4336			1-methylnicotinamide	LC/MS pos early	27665	C02918	HMDB0000699	457		0.5	0.77	0.94	1.53	1.87	1.22		0.0278953	0.070843	0.499067	0.716481	0.856015	0.868761	0.043578	0.0768145	0.0280922	0.0754954	0.310187	0.812726		1.2018	0.6023	0.9207	1.1247		100	100	100	100		Cofactors and Vitamins	Nicotinate and Nicotinamide Metabolism	55	1005-24-9
4342			trigonelline (N'-methylnicotinate)	LC/MS pos early	32401	C01004	HMDB0000875	5570		0.55	0.96	0.92	1.74	1.67	0.96		0.226107	0.246456	0.999764	0.811963	0.987157	0.885407	0.0918898	0.119896	0.0260069	0.0737224	0.981866	0.952937		1.6852	0.9328	1.6255	1.5564		100	100	100	100		Cofactors and Vitamins	Nicotinate and Nicotinamide Metabolism	100001092	535-83-1
4344			N1-methyl-2-pyridone-5-carboxamide	LC/MS neg	40469	C05842	HMDB0004193	69698		0.38	0.4	0.45	1.06	1.18	1.12		0.0277225	0.0707444	0.0409583	0.551308	0.0770694	0.577955	0.928711	0.462928	0.805113	0.468295	0.694712	0.920108		2.4369	0.9213	0.975	1.0892		100	100	100	100		Cofactors and Vitamins	Nicotinate and Nicotinamide Metabolism	100001468	701-44-0
4356		Pantothenate and CoA Metabolism	pantoate	LC/MS neg	63061	C00522	HMDB0240389	5289105		0.11	0.34	0.58	3.19	5.43	1.7		0.000587982	0.00884441	0.172791	0.579607	0.854336	0.868761	0.0051475	0.03673	0.00112009	0.0408052	0.0178234	0.672423		2.3215	0.2479	0.7917	1.3449		92	57	100	86		Cofactors and Vitamins	Pantothenate and CoA Metabolism	100002613	470-29-1
4357			pantothenate	LC/MS neg	1508	C00864	HMDB0000210	6613		1.59	1.27	1.11	0.8	0.7	0.87		0.0163655	0.0535337	0.191028	0.579607	0.406232	0.744374	0.130031	0.145657	0.0369668	0.0836828	0.275035	0.794335		0.9191	1.4588	1.1715	1.0199		100	100	100	100		Cofactors and Vitamins	Pantothenate and CoA Metabolism	1024	137-08-6
4369		Ascorbate and Aldarate Metabolism	ascorbic acid 2-sulfate	LC/MS polar	63590		HMDB0060649	54676864		0.24	0.57	0.43	2.4	1.8	0.75		0.000759682	0.00978762	0.249667	0.592053	0.0911223	0.577955	0.0348143	0.069743	0.204872	0.218594	0.184289	0.734339		2.2855	0.5456	1.3074	0.9838		100	100	100	100		Cofactors and Vitamins	Ascorbate and Aldarate Metabolism	100009329
4370			ascorbic acid 3-sulfate*	LC/MS polar	63687			11425365		0.85	0.92	0.72	1.09	0.85	0.78		0.78953	0.482707	0.852375	0.785893	0.356641	0.72078	0.808066	0.426384	0.220196	0.228634	0.186598	0.734339		1.4934	1.265	1.3773	1.0739		100	100	100	100		Cofactors and Vitamins	Ascorbate and Aldarate Metabolism	100020409
4373			2-O-methylascorbic acid	LC/MS polar	63990		HMDB0240294	54726398		0.39	0.52	0.52	1.35	1.34	0.99		0.0184882	0.056058	0.170194	0.579607	0.170366	0.648226	0.119637	0.137264	0.241969	0.244178	0.742821	0.923804		2.0746	0.802	1.0801	1.071		100	100	100	100		Cofactors and Vitamins	Ascorbate and Aldarate Metabolism	100003258	17860-87-6
4374			threonate	LC/MS polar	27738	C01620	HMDB0000943 HMDB0062620	5460407;151152		0.47	0.63	0.68	1.34	1.43	1.07		0.0225848	0.0621522	0.197622	0.579607	0.288985	0.697616	0.206396	0.189784	0.0909517	0.132486	0.711872	0.920108		1.4284	0.6743	0.9038	0.9652		100	100	100	100		Cofactors and Vitamins	Ascorbate and Aldarate Metabolism	100001022	70753-61-6
4377			oxalate (ethanedioate)	LC/MS neg	20694	C00209	HMDB0002329	971		0.62	0.71	0.7	1.14	1.11	0.98		0.0284498	0.0708881	0.147167	0.554356	0.155635	0.648226	0.434637	0.2933	0.812596	0.471012	0.531676	0.88598		1.4396	0.8982	1.0225	1.0006		100	100	100	100		Cofactors and Vitamins	Ascorbate and Aldarate Metabolism	100000841	144-62-7
4378			gulonate*	LC/MS polar	46957	C00800	HMDB0003290	152304		0.76	1.07	0.85	1.41	1.12	0.79		0.665471	0.450675	0.60946	0.740632	0.797495	0.860642	0.0109944	0.0442727	0.720463	0.438354	0.0686056	0.703731		1.5162	1.1497	1.6265	1.2893		100	100	100	100		Cofactors and Vitamins	Ascorbate and Aldarate Metabolism	100001586	20246-53-1
4381		Tocopherol Metabolism	alpha-tocopherol	LC/MS pos late	1561	C02477	HMDB0001893	86472		0.69	0.78	0.74	1.13	1.07	0.95		0.00150757	0.0122516	0.142161	0.551308	0.0736636	0.577955	0.715246	0.39955	0.843597	0.480977	0.436268	0.846183		1.2042	0.8298	0.9343	0.8906		100	100	100	100		Cofactors and Vitamins	Tocopherol Metabolism	1105	59-02-9;10191-41-0
4392			alpha-CEHC sulfate	LC/MS neg	47666					0.69	0.66	0.4	0.95	0.58	0.61		0.475833	0.385511	0.382139	0.669874	0.147077	0.641953	0.844057	0.43614	0.42928	0.333125	0.612788	0.920108		1.2166	0.8401	0.7992	0.4905		75	86	57	43		Cofactors and Vitamins	Tocopherol Metabolism	100005972
4403			gamma-tocopherol/beta-tocopherol	LC/MS pos late	52473	C14152 C02483	HMDB0006335 HMDB0001492			0.72	0.58	0.85	0.81	1.18	1.45		0.6798	0.454964	0.374629	0.669085	0.896724	0.87517	0.50042	0.322418	0.673528	0.422268	0.106387	0.703731		1.605	1.1548	0.9387	1.3589		100	100	100	100		Cofactors and Vitamins	Tocopherol Metabolism	100008998
4415		Pterin Metabolism	pterin	LC/MS pos early	43023	C00715	HMDB0000802	135398660		1.32	0.57	0.91	0.43	0.69	1.6		0.268847	0.272581	0.203413	0.579607	0.795745	0.860642	0.0182383	0.0532048	0.137894	0.167793	0.108666	0.703731		1.0775	1.4276	0.6167	0.9855		67	86	57	86		Cofactors and Vitamins	Pterin Metabolism	100004216	22363-60-4
4428		Hemoglobin and Porphyrin Metabolism	heme	LC/MS pos late	41754	C00032	HMDB0003178	26945		1.01	0.48	0.72	0.47	0.71	1.51		0.696848	0.459894	0.141156	0.551308	0.761086	0.854631	0.293843	0.233205	0.837175	0.47918	0.264246	0.782573		1.7974	1.8159	0.8566	1.2959		100	100	100	100		Cofactors and Vitamins	Hemoglobin and Porphyrin Metabolism	100001386	14875-96-8
4429			bilirubin (Z,Z)	LC/MS pos late	43807	C00486	HMDB0000054	5280352		0.96	0.81	0.73	0.84	0.76	0.91		0.628384	0.441992	0.580157	0.733209	0.474304	0.755964	0.312827	0.242235	0.128627	0.158824	0.975318	0.952937		1.1668	1.1194	0.9397	0.8548		100	100	100	100		Cofactors and Vitamins	Hemoglobin and Porphyrin Metabolism	1090	635-65-4
4430			bilirubin (E,E)*	LC/MS pos late	32586		HMDB0240584	129320511		1.06	1.08	0.62	1.01	0.59	0.58		0.215717	0.239894	0.53532	0.726638	0.348656	0.72078	0.645703	0.375612	0.0868431	0.12874	0.100402	0.703731		1.2222	1.3008	1.3145	0.7638		75	100	86	86		Cofactors and Vitamins	Hemoglobin and Porphyrin Metabolism	100001950
4432			biliverdin	LC/MS pos late	2137	C00500	HMDB0001008	5280353		1.26	0.46	0.45	0.37	0.36	0.98		0.713671	0.46427	0.186239	0.579607	0.168466	0.648226	0.138594	0.151869	0.153135	0.179331	0.928878	0.94919		1.915	2.4074	0.8858	0.8703		67	100	57	57		Cofactors and Vitamins	Hemoglobin and Porphyrin Metabolism	250	55482-27-4;55482-27-4
4450		Vitamin A Metabolism	retinol (vitamin A)	LC/MS pos late	1806	C00473	HMDB0000305	445354		0.99	0.95	0.89	0.96	0.89	0.93		0.887894	0.515405	0.919777	0.790341	0.632332	0.815377	0.789977	0.421702	0.556069	0.384908	0.403207	0.8279		1.0728	1.0664	1.0238	0.9519		100	100	100	100		Cofactors and Vitamins	Vitamin A Metabolism	498	68-26-8
4458			retinal	LC/MS pos late	40807	C00376	HMDB0001358	638015		1.02	0.97	0.97	0.95	0.95	1		0.60025	0.432571	0.914937	0.789259	0.938744	0.87517	0.617803	0.368092	0.641597	0.414093	0.956016	0.950247		0.9606	0.9816	0.9328	0.9286		75	100	86	86		Cofactors and Vitamins	Vitamin A Metabolism	100004088
4471		Vitamin B6 Metabolism	pyridoxal	LC/MS pos early	1651	C00250	HMDB0001545	1050		0.95	0.8	0.79	0.84	0.82	0.98		0.475101	0.385511	0.586862	0.735252	0.60218	0.80654	0.194601	0.184461	0.176972	0.197588	0.915742	0.942048		1.0931	1.0413	0.8728	0.8585		100	100	100	86		Cofactors and Vitamins	Vitamin B6 Metabolism	491	65-22-5
4472			pyridoxate	LC/MS neg	31555	C00847	HMDB0000017	6723		0.34	0.46	0.51	1.35	1.53	1.13		0.0137509	0.0494133	0.163275	0.579607	0.158253	0.648226	0.993868	0.47912	0.300124	0.275233	0.500691	0.870645		2.4185	0.8156	1.1038	1.2443		100	100	100	100		Cofactors and Vitamins	Vitamin B6 Metabolism	100001121	82-82-6
4483	Xenobiotics	Benzoate Metabolism	hippurate	LC/MS neg	15753	C01586	HMDB0000714	464		1.21	0.9	0.95	0.75	0.78	1.05		0.728284	0.469154	0.723372	0.773858	0.887166	0.873243	0.511228	0.327383	0.835592	0.478819	0.39246	0.825559		1.955	2.3657	1.7658	1.8547		100	100	100	100		Xenobiotics	Benzoate Metabolism	100000014	495-69-2
4487			2-hydroxyhippurate (salicylurate)	LC/MS neg	18281	C07588	HMDB0000840	10253		0.27	0.47	0.52	1.76	1.94	1.1		0.0744496	0.121006	0.67468	0.757018	0.69671	0.843715	0.105068	0.128143	0.047284	0.0963938	0.995382	0.954738		2.2717	0.606	1.0674	1.1779		75	43	71	86		Xenobiotics	Benzoate Metabolism	1869	487-54-7
4491			4-hydroxyhippurate	LC/MS neg	35527		HMDB0013678	151012		0.66	1.7	0.8	2.55	1.2	0.47		0.698237	0.459894	0.314439	0.620283	0.780234	0.85544	0.244488	0.208521	0.398495	0.32012	0.401499	0.826218		2.6476	1.7599	4.4919	2.119		100	100	100	100		Xenobiotics	Benzoate Metabolism	100001423	2482-25-9
4494			mandelate	LC/MS polar	22160	C01984	HMDB0000703	439616;1292		1.79	2.54	0.71	1.42	0.4	0.28		0.880423	0.513375	0.635784	0.743899	0.338001	0.72078	0.0129471	0.0464947	0.794239	0.464659	0.428351	0.845053		1.4886	2.6664	3.7821	1.0543		100	86	86	100		Xenobiotics	Benzoate Metabolism	100000710	90-64-2
4498			benzoate	LC/MS neg	15778	C00180	HMDB0001870	243		7.48	2.75	2.63	0.37	0.35	0.96		0.0408852	0.0874375	0.382419	0.669874	0.0955179	0.590154	0.0644243	0.0981041	0.296504	0.27391	0.332548	0.81569		0.9423	7.0485	2.5945	2.4784		100	100	100	100		Xenobiotics	Benzoate Metabolism	100000008	65-85-0
4508			4-hydroxybenzoate	LC/MS neg	21133	C00156	HMDB0000500	135		0.79	1.32	10.41	1.67	13.2	7.89		0.352679	0.323435	0.543619	0.726638	0.385307	0.738651	0.28751	0.231552	0.299651	0.275233	0.586487	0.920108		0.4832	0.381	0.6374	5.0308		17	29	29	29		Xenobiotics	Benzoate Metabolism	100000862	99-96-7
4520			catechol sulfate	LC/MS neg	35320		HMDB0059724	3083879		0.27	0.41	0.69	1.51	2.57	1.7		0.359922	0.326841	0.787525	0.778124	0.567094	0.792044	0.0721299	0.104312	0.0726262	0.117988	0.61891	0.920108		3.0689	0.8299	1.2504	2.1312		100	100	100	100		Xenobiotics	Benzoate Metabolism	100001605	4918-96-1
4523			guaiacol sulfate	LC/MS neg	46111		HMDB0060013	22473		0.11	0.14	0.15	1.27	1.35	1.06		0.075396	0.121274	0.130042	0.551308	0.194466	0.656492	0.660809	0.379671	0.146508	0.175257	0.711637	0.920108		7.1658	0.8063	1.0262	1.0845		58	29	57	57		Xenobiotics	Benzoate Metabolism	100004208
4524			3-methyl catechol sulfate (1)	LC/MS neg	46165			118431379		0.56	0.92	1.44	1.65	2.59	1.57		0.283192	0.282255	0.56046	0.726638	0.331165	0.72078	0.00455621	0.03673	0.0138647	0.0622439	0.391088	0.825559		1.0036	0.5595	0.9216	1.4502		92	43	100	71		Xenobiotics	Benzoate Metabolism	100004112
4526			4-ethylcatechol sulfate	LC/MS neg	63072					0.11	0.13	0.07	1.11	0.6	0.54		0.527049	0.405903	0.754374	0.778124	0.426212	0.744374	0.540965	0.339594	0.882921	0.486284	0.450385	0.855403		11.9232	1.3701	1.5159	0.816		75	71	100	86		Xenobiotics	Benzoate Metabolism	100020536
4527			4-methylcatechol sulfate	LC/MS neg	46146		HMDB0240459	54104170		0.5	0.97	1.66	1.95	3.34	1.72		0.783057	0.480976	0.388393	0.672285	0.144349	0.641688	0.0128102	0.0464947	0.000367802	0.0408052	0.182328	0.734339		2.1962	1.0916	2.127	3.6482		92	100	100	100		Xenobiotics	Benzoate Metabolism	100004111
4528			4-allylcatechol sulfate	LC/MS neg	63597					1.68	1.72	1.79	1.02	1.06	1.04		0.70104	0.460467	0.24425	0.587269	0.205775	0.662551	0.573859	0.348391	0.62156	0.408626	0.817435	0.936236		1.0034	1.69	1.7225	1.7917		92	100	100	100		Xenobiotics	Benzoate Metabolism	100020578
4539			4-acetylphenol sulfate	LC/MS neg	44620			4684006		0.2	0.4	0.46	1.94	2.24	1.16		0.0351079	0.08011	0.454888	0.700066	0.551493	0.782356	0.160172	0.163359	0.0571099	0.104569	0.894317	0.942048		2.6582	0.5427	1.0513	1.2154		75	71	71	100		Xenobiotics	Benzoate Metabolism	100000711
4545			4-ethylphenylsulfate	LC/MS neg	36099	C13637	HMDB0062551	20822574		0.49	1.48	1.69	3.02	3.46	1.15		0.331274	0.314733	0.535078	0.726638	0.269373	0.683971	0.0677419	0.10142	0.0572215	0.104569	0.68538	0.920108		1.6924	0.8274	2.4992	2.8633		100	100	100	100		Xenobiotics	Benzoate Metabolism	100001756	123-07-9
4547			4-vinylphenol sulfate	LC/MS neg	36098	C05627	HMDB0062775	6426766		0.11	0.33	0.08	3.02	0.75	0.25		0.102575	0.147002	0.347037	0.645735	0.0915309	0.577955	0.468386	0.310093	0.783094	0.463042	0.659717	0.920108		11.9228	1.2992	3.924	0.9685		100	100	100	100		Xenobiotics	Benzoate Metabolism	100001755	2628-17-3
4552			4-vinylcatechol sulfate	LC/MS neg	64579					0.07	0.32	0.06	4.81	0.84	0.17		0.237316	0.25303	0.770312	0.778124	0.24613	0.682672	0.264724	0.220421	0.858438	0.483665	0.378746	0.819272		19.5306	1.2821	6.1704	1.0747		92	86	100	100		Xenobiotics	Benzoate Metabolism	100021208
4564			3-methoxycatechol sulfate (2)	LC/MS neg	48752					0.52	0.52	0.52	1	1	1		0.141031	0.182261	0.141031	0.551308	0.141031	0.638125								1.0873	0.5654	0.5654	0.5654		33	0	14	0		Xenobiotics	Benzoate Metabolism	100006376
4566			methyl-4-hydroxybenzoate sulfate	LC/MS neg	48429		HMDB0041646	10657183		151.54	259.47	69.3	1.71	0.46	0.27		0.0544038	0.0984182	0.0985543	0.551308	0.15408	0.648226	0.77485	0.416985	0.487038	0.358885	0.561451	0.901949		0.3705	56.1471	96.1354	25.6767		58	71	86	57		Xenobiotics	Benzoate Metabolism	100006116
4574			p-cresol sulfate	LC/MS neg	36103		HMDB0011635	4615423		0.78	1.17	1.29	1.51	1.66	1.1		0.707433	0.462491	0.492857	0.716481	0.332394	0.72078	0.224816	0.199413	0.107415	0.141682	0.527617	0.884446		1.5694	1.2171	1.8387	2.0182		100	100	100	100		Xenobiotics	Benzoate Metabolism	100001315	3233-57-7
4581			o-cresol sulfate	LC/MS neg	36845		HMDB0011635	11615528		0.54	0.68	0.97	1.27	1.8	1.42		0.648221	0.446433	0.842469	0.785893	0.976167	0.882192	0.389485	0.276157	0.684744	0.426414	0.897706	0.942048		1.3122	0.7061	0.898	1.2738		58	57	86	57		Xenobiotics	Benzoate Metabolism	100001806
4582			phenylpropionylglycine	LC/MS neg	35434		HMDB0000860	152323		0.26	0.46	0.37	1.75	1.39	0.79		0.104665	0.148297	0.317362	0.623928	0.349065	0.72078	0.395283	0.277737	0.441657	0.337237	0.833895	0.94052		2.9035	0.7687	1.3482	1.0667		92	100	86	100		Xenobiotics	Benzoate Metabolism	100001591	56613-60-6
4590			3-(3-hydroxyphenyl)propionate sulfate	LC/MS neg	45415		HMDB0094710	187488		0.12	0.27	0.28	2.31	2.36	1.02		0.929837	0.52532	0.381089	0.669874	0.378551	0.738491	0.0799367	0.110146	0.0918185	0.132977	0.971871	0.952347		6.4898	0.7671	1.7739	1.8132		83	100	100	100		Xenobiotics	Benzoate Metabolism	100005391	86321-32-6
4593			3-(3-hydroxyphenyl)propionate	LC/MS neg	35635	C11457	HMDB0000375	91		3.16	1.2	1.57	0.38	0.5	1.31		0.244578	0.257207	0.820712	0.785148	0.763122	0.854631	0.143763	0.155089	0.10241	0.139964	0.787104	0.935015		1.3475	4.2558	1.6184	2.12		92	86	86	86		Xenobiotics	Benzoate Metabolism	100001624	621-54-5
4595			3-(4-hydroxyphenyl)propionate	LC/MS neg	39587	C01744	HMDB0002199	10394		6.33	6.92	3.64	1.09	0.58	0.53		0.509333	0.397413	0.633567	0.743608	0.422276	0.744374	0.842098	0.435983	0.959849	0.507757	0.697243	0.920108		0.9085	5.751	6.2853	3.3104		67	57	71	71		Xenobiotics	Benzoate Metabolism	100002914	501-97-3
4596			3-phenylpropionate (hydrocinnamate)	LC/MS neg	15749	C05629	HMDB0000764	107		0.49	0.4	0.37	0.81	0.75	0.94		0.569741	0.422203	0.463989	0.708559	0.428939	0.744374	0.84282	0.435983	0.798387	0.466001	0.952991	0.950247		2.0803	1.0237	0.8241	0.7719		92	100	86	100		Xenobiotics	Benzoate Metabolism	100000010	501-52-0
4606			2-methoxyhydroquinone sulfate (1)	LC/MS neg	64049					0.27	0.33	0.27	1.21	1	0.82		0.041289	0.0875586	0.111226	0.551308	0.041289	0.577955	0.355918	0.262644			0.355918	0.81569		1.3757	0.3709	0.4503	0.3709		50	0	14	14		Xenobiotics	Benzoate Metabolism	100021839
4651		Food Component/Plant	maltol sulfate	LC/MS neg	48696					0.14	0.73	1.11	5.15	7.85	1.52		0.0170942	0.054695	0.806778	0.782098	0.716413	0.849177	0.0989652	0.123687	0.0450369	0.0931774	0.479017	0.866632		2.1014	0.2974	1.5312	2.3335		75	29	71	86		Xenobiotics	Food Component/Plant	100006106
4658			2-piperidinone	LC/MS pos early	43400		HMDB0011749	12665		1.47	3.23	2.96	2.2	2.01	0.92		0.267106	0.272436	0.0355104	0.520187	0.161556	0.648226	0.195414	0.184461	0.404009	0.321256	0.47535	0.866632		0.804	1.1818	2.5967	2.3798		100	100	100	100		Xenobiotics	Food Component/Plant	100004295	675-20-7
4727			1-methyl-beta-carboline-3-carboxylic acid	LC/MS neg	43449			5406157		0.5	0.5	0.37	0.99	0.74	0.75		0.349564	0.323435	0.470185	0.712518	0.386123	0.738651	0.816477	0.428536	0.873171	0.485021	0.846459	0.940991		2.8584	1.4364	1.4175	1.0586		67	14	43	43		Xenobiotics	Food Component/Plant	100004434	22329-38-0
4794			2,3-dihydroxyisovalerate	LC/MS polar	38276	C04039	HMDB0012141	677		0.1	0.23	0.26	2.35	2.63	1.12		0.00113227	0.0110258	0.0613863	0.551308	0.0879249	0.577955	0.104652	0.127969	0.0601272	0.107533	0.710274	0.920108		5.5482	0.5513	1.2964	1.4479		100	71	100	100		Xenobiotics	Food Component/Plant	100002417	1756-18-9
4799			2,8-quinolinediol sulfate	LC/MS neg	48691		HMDB0240658			0.12	0.2	0.14	1.69	1.19	0.7		0.222584	0.244444	0.842158	0.785893	0.397506	0.744374	0.0916858	0.119896	0.175426	0.197588	0.264158	0.782573		4.5614	0.544	0.9208	0.6483		25	0	43	43		Xenobiotics	Food Component/Plant	100004321
4802			2-isopropylmalate	LC/MS polar	15667	C02504	HMDB0000402	77		0.58	0.47	0.46	0.81	0.8	0.99		0.531192	0.408436	0.200877	0.579607	0.19031	0.652763	0.350166	0.262644	0.427501	0.332569	0.896981	0.942048		1.9577	1.1308	0.9119	0.9037		100	100	100	100		Xenobiotics	Food Component/Plant	100000409	3237-44-3
4803			2-oxindole-3-acetate	LC/MS pos early	40479		HMDB0035514	3080590		0.09	0.14	0.05	1.52	0.51	0.34		0.17811	0.21579	0.339025	0.640672	0.0606107	0.577955	0.60651	0.363683	0.60281	0.401777	0.256156	0.782573		12.478	1.1567	1.7536	0.5945		83	71	100	100		Xenobiotics	Food Component/Plant	100003109	2971-31-5
4807			3-formylindole	LC/MS pos early	62863	C08493	HMDB29737	10256		1.26	1.04	1.07	0.83	0.85	1.02		0.0299169	0.0738469	0.83163	0.785893	0.386081	0.738651	0.120236	0.137264	0.095727	0.136198	0.54336	0.892933		0.9298	1.1746	0.9714	0.9955		100	100	100	100		Xenobiotics	Food Component/Plant	100020219	487-89-8
4815			3-hydroxyindolin-2-one sulfate	LC/MS neg	48419					0.86	1.45	0.87	1.69	1.01	0.6		0.808295	0.487768	0.347619	0.645735	0.537334	0.778204	0.218266	0.196213	0.688791	0.428404	0.694526	0.920108		1.0622	0.9117	1.5378	0.9215		67	71	100	86		Xenobiotics	Food Component/Plant	100006103
4827			gluconate	LC/MS polar	587	C00257	HMDB0000625	3085666;10690		1.68	0.85	1.33	0.51	0.79	1.56		0.386799	0.341105	0.944395	0.797281	0.858044	0.868761	0.288342	0.231822	0.441493	0.337237	0.626176	0.920108		1.8771	3.15	1.6007	2.4977		100	100	100	100		Xenobiotics	Food Component/Plant	338	527-07-1
4850			beta-guanidinopropanoate	LC/MS pos early	35101	C03065	HMDB0013222	67701		1.84	0.65	0.73	0.35	0.4	1.13		0.441315	0.372394	0.775916	0.778124	0.954861	0.880225	0.336625	0.257352	0.292663	0.272624	0.750732	0.923804		1.0977	2.0247	0.7102	0.8002		75	71	86	86		Xenobiotics	Food Component/Plant	100001411	353-09-3
4875			cinnamoylglycine	LC/MS neg	38637		HMDB0011621	709625		0.44	0.49	0.39	1.11	0.87	0.79		0.468611	0.383186	0.37828	0.669085	0.3363	0.72078	0.655194	0.379244	0.619689	0.408626	0.944779	0.94919		2.6917	1.1889	1.3148	1.0399		92	100	100	100		Xenobiotics	Food Component/Plant	100002253	16534-24-0
4896			genistein sulfate*	LC/MS neg	62061					0.03	0.29	1.26	8.89	38.66	4.35		0.000717564	0.0094761	0.694748	0.767697	0.472433	0.755964	0.0109428	0.0442727	0.106642	0.141219	0.688937	0.920108		4.3857	0.1431	1.2728	5.5327		83	14	100	71		Xenobiotics	Food Component/Plant	100020207
4902			dihydroferulic acid sulfate	LC/MS neg	62857		HMDB0041724	187489		0.05	0.06	0.07	1.11	1.34	1.21		0.0105365	0.0421651	0.0142574	0.4917	0.0245678	0.530801	0.74389	0.41122	0.478582	0.35395	0.585047	0.920108		8.6863	0.4375	0.484	0.5874		67	29	43	43		Xenobiotics	Food Component/Plant	100020272
4914			equol sulfate	LC/MS neg	40478					1.27	4.11	4.67	3.23	3.68	1.14		0.925945	0.52532	0.0801851	0.551308	0.178378	0.648226	0.0202156	0.0552222	0.241944	0.244178	0.936546	0.94919		0.903	1.1465	3.7075	4.2183		83	86	100	86		Xenobiotics	Food Component/Plant	100003429
4915			ergothioneine	LC/MS pos early	37459	C05570	HMDB0003045	5351619		2.76	2.18	2.05	0.79	0.74	0.94		0.0166079	0.0535337	0.0238654	0.519117	0.0400837	0.577955	0.190985	0.183563	0.0483587	0.0965793	0.23236	0.758342		0.724	1.9979	1.5787	1.4875		100	100	100	100		Xenobiotics	Food Component/Plant	100002154	58511-63-0
4917			erythritol	LC/MS polar	20699	C00503	HMDB0002994	222285		0.54	0.64	0.64	1.19	1.18	0.99		0.017633	0.0552045	0.129666	0.551308	0.111025	0.638125	0.22092	0.198071	0.0635667	0.110921	0.777368	0.931556		1.6038	0.8658	1.0293	1.0238		100	100	100	100		Xenobiotics	Food Component/Plant	100000846	149-32-6
4923			ferulic acid 4-sulfate	LC/MS neg	47114		HMDB0029200	6305574		0.01	0.03	0.02	3.06	2.23	0.73		0.00118975	0.0110258	0.0130553	0.4917	0.00715467	0.491602	0.0867732	0.115644	0.0337569	0.0800209	0.743797	0.923804		16.3801	0.179	0.5476	0.3989		75	14	71	71		Xenobiotics	Food Component/Plant	100005389	86321-29-1
4927			quinate	LC/MS polar	18335	C00296	HMDB0003072	6508		0.41	1.07	5.1	2.62	12.48	4.77		0.0912994	0.135853	0.87776	0.786109	0.168054	0.648226	0.0777333	0.109368	0.0349219	0.0810628	0.185584	0.734339		0.9555	0.3905	1.0224	4.8735		75	43	71	86		Xenobiotics	Food Component/Plant	100000442	77-95-2
4948			glycitein sulfate (2)	LC/MS neg	62887					0.47	1.41	1.94	2.98	4.12	1.38		0.0878595	0.132018	0.984213	0.807624	0.81141	0.86653	0.224713	0.199413	0.491036	0.360194	0.877327	0.942048		0.9065	0.4282	1.2761	1.7628		75	29	71	43		Xenobiotics	Food Component/Plant	100021092
4955			homostachydrine*	LC/MS pos early	33009	C08283	HMDB0033433	441447		2.46	4.79	5.82	1.95	2.37	1.22		0.456924	0.379014	0.0469922	0.551308	0.0115112	0.491602	0.0317538	0.0674211	0.030797	0.0773848	0.295426	0.795136		0.8325	2.0486	3.9863	4.8465		100	100	100	100		Xenobiotics	Food Component/Plant	100001550	1195-94-4
4960			indolin-2-one	LC/MS pos early	43374	C12312		321710		0.9	1.42	1.29	1.58	1.44	0.91		0.746244	0.470961	0.372208	0.669085	0.173148	0.648226	0.531164	0.334837	0.153528	0.179331	0.762498	0.926554		1.134	1.0157	1.607	1.4625		92	86	100	100		Xenobiotics	Food Component/Plant	100004318	59-48-3
4981			mannonate*	LC/MS polar	62864			3246006		0.72	0.6	0.67	0.83	0.92	1.11		0.521231	0.403124	0.167043	0.579607	0.317841	0.72078	0.0810079	0.110967	0.214481	0.223825	0.551626	0.895819		1.6895	1.2223	1.0194	1.1292		100	100	100	100		Xenobiotics	Food Component/Plant	100003695	642-99-9
5066			acesulfame	LC/MS neg	48569		HMDB0033585	36573		1	1.44	1	1.44	1	0.69				0.355918	0.653236			0.355918	0.262644			0.355918	0.81569		0.3915	0.3915	0.5654	0.3915		0	0	14	14		Xenobiotics	Food Component/Plant	100006203	55589-62-3
5086			stachydrine	LC/MS pos early	34384	C10172	HMDB0004827	115244		0.66	1.3	1.58	1.97	2.41	1.22		0.194266	0.225041	0.373171	0.669085	0.209578	0.662551	0.00553268	0.03673	0.00664698	0.0449856	0.322042	0.81569		1.0157	0.6674	1.3161	1.606		100	100	100	100		Xenobiotics	Food Component/Plant	100001296	4136-37-2
5096			tartarate	LC/MS neg	15336	C00552 C00898 C02107	HMDB0062642 HMDB0000956	444305;875		9.15	5.68	5.31	0.62	0.58	0.94		0.0328265	0.0770676	0.0304329	0.519117	0.0231426	0.512829	0.857177	0.440483	0.835352	0.478819	0.969921	0.952347		0.3795	3.4709	2.1542	2.0153		58	100	86	86		Xenobiotics	Food Component/Plant	100000295	87-69-4;6106-24-7
5100			thymol sulfate	LC/MS neg	36095	C09908	HMDB0062720	12456386		0.3	0.72	0.41	2.39	1.36	0.57		0.0576283	0.103542	0.216228	0.579607	0.119893	0.638125	0.621014	0.369064	0.753689	0.454154	0.648383	0.920108		3.337	1.0078	2.4079	1.367		100	100	100	100		Xenobiotics	Food Component/Plant	100001757	89-83-8
5112			ethyl alpha-glucopyranoside	LC/MS neg	63152		HMDB0029968	11127487		0.43	0.81	0.48	1.87	1.11	0.59		0.102967	0.147002	0.731538	0.773858	0.201173	0.662551	0.0368303	0.0719829	0.681066	0.42465	0.144498	0.734339		1.5326	0.6618	1.2383	0.7355		83	43	86	71		Xenobiotics	Food Component/Plant	100015965	34625-23-5
5113			methyl glucopyranoside (alpha + beta)	LC/MS pos early	46144		HMDB0029965	445238;3036743;2108		1.02	1.23	1.46	1.21	1.43	1.18		0.766981	0.477206	0.609355	0.740632	0.457057	0.753573	0.764563	0.414272	0.643213	0.414093	0.753064	0.923804		0.7842	0.7988	0.9648	1.1432		92	86	86	100		Xenobiotics	Food Component/Plant	100005864
5139			4-vinylguaiacol sulfate	LC/MS neg	48442		HMDB0127980	53803570		0.17	0.49	0.11	2.95	0.67	0.23		0.279603	0.281601	0.924971	0.790591	0.261598	0.683017	0.226222	0.199757	0.982004	0.513714	0.341275	0.81569		8.1613	1.3537	3.9999	0.9089		92	100	100	100		Xenobiotics	Food Component/Plant	100006126
5140			pyrraline	LC/MS neg	48428	C21013	HMDB0033143	14274616		0.36	0.76	0.82	2.13	2.29	1.07		0.0302831	0.0740586	0.70598	0.768423	0.829762	0.868761	0.0132783	0.0464947	0.0181584	0.0675959	0.874503	0.942048		1.8147	0.65	1.387	1.4859		100	86	100	100		Xenobiotics	Food Component/Plant	100001767	74509-14-1
5143			daidzein sulfate (2)	LC/MS neg	48728			12114465		0.08	0.3	0.79	3.61	9.43	2.61		0.0152942	0.0527358	0.683686	0.762795	0.509666	0.768698	0.0422642	0.0756405	0.162133	0.186452	0.71486	0.920941		4.4122	0.3698	1.3363	3.4885		92	86	100	86		Xenobiotics	Food Component/Plant	100006363
5145			eugenol sulfate	LC/MS neg	48715		HMDB0135245	180632		1.37	0.95	0.96	0.7	0.71	1.01		0.185578	0.218816	0.310103	0.620283	0.380881	0.738651	0.548663	0.341262	0.350976	0.299534	0.909981	0.942048		1.5227	2.0811	1.4497	1.468		83	100	100	100		Xenobiotics	Food Component/Plant	100006171	95480-60-7
5182			furaneol sulfate	LC/MS neg	54795			59815364		0.22	0.62	0.79	2.89	3.67	1.27		0.0432864	0.0893183	0.932457	0.793437	0.662698	0.829943	0.0396031	0.0744839	0.00740105	0.0469288	0.70954	0.920108		2.0061	0.4327	1.2489	1.5881		100	100	100	100		Xenobiotics	Food Component/Plant	100009328
5225			(2,4 or 2,5)-dimethylphenol sulfate	LC/MS neg	62533					0.43	0.83	0.42	1.94	0.98	0.5		0.813175	0.489462	0.443563	0.694802	0.83065	0.868761	0.347965	0.262584	0.966	0.508868	0.303408	0.801738		2.3139	0.9901	1.9188	0.9684		100	100	100	100		Xenobiotics	Food Component/Plant	100020519
5226			caffeic acid sulfate	LC/MS polar	53254		HMDB0041708	21668705		0.23	0.26	0.23	1.09	1	0.92		0.018148	0.056058	0.0295269	0.519117	0.018148	0.491602	0.355918	0.262644			0.355918	0.81569		1.4629	0.3433	0.374	0.3433		58	0	14	14		Xenobiotics	Food Component/Plant	100009337
5229			tartronate (hydroxymalonate)	LC/MS neg	20693	C02287	HMDB0035227	45		0.73	0.84	0.83	1.15	1.14	0.99		0.106008	0.149326	0.447325	0.69519	0.40939	0.744374	0.559012	0.343561	0.815769	0.472307	0.657612	0.920108		1.2308	0.8943	1.0328	1.021		100	100	100	100		Xenobiotics	Food Component/Plant	100000840	80-69-3
5237			3-indoleglyoxylic acid	LC/MS neg	63583			73863		0.75	0.59	0.88	0.79	1.17	1.48		0.870017	0.510313	0.265	0.595292	0.617754	0.808754	0.093299	0.120787	0.202394	0.21641	0.0488829	0.703731		1.409	1.0562	0.8383	1.2394		100	100	86	100		Xenobiotics	Food Component/Plant	100020372	1477-49-2
5272			2-acetamidophenol sulfate	LC/MS neg	48580			181671		0.74	0.98	0.99	1.32	1.33	1.01		0.948681	0.530639	0.587581	0.735252	0.707809	0.848782	0.195749	0.184461	0.290554	0.272624	0.772641	0.931556		1.508	1.1196	1.4752	1.4887		92	100	100	100		Xenobiotics	Food Component/Plant	100006190	40712-60-5
5273			2-aminophenol sulfate	LC/MS neg	43266		HMDB0061116	181670		0.35	0.5	0.38	1.42	1.07	0.75		0.264338	0.271133	0.869882	0.785893	0.380641	0.738651	0.269227	0.222546	0.17689	0.197588	0.339857	0.81569		6.2107	2.2033	3.1311	2.3539		100	100	100	100		Xenobiotics	Food Component/Plant	100004322
5852		Drug - Neurological	gabapentin	LC/MS neg	38686	D00332	HMDB0005015	3446		0.03	0.08	0.78	2.95	29.07	9.84		0.166583	0.206791	0.485663	0.716481	0.605919	0.80654	0.355918	0.262644	0.120952	0.152921	0.104572	0.703731		1.1431	0.0306	0.0904	0.8896		17	0	29	43		Xenobiotics	Drug - Neurological	100002806	60142-96-3
5982		Drug - Topical Agents	salicylate	LC/MS polar	1515	C00805	HMDB0001895	338		0.77	0.69	0.59	0.9	0.76	0.85		0.468497	0.383186	0.721512	0.773858	0.543738	0.778204	0.593483	0.356329	0.668927	0.420529	0.80381	0.935671		1.7169	1.3303	1.1915	1.0163		100	100	100	100		Xenobiotics	Drug - Topical Agents	501	69-72-7
5984			2,6-dihydroxybenzoic acid	LC/MS neg	63042		HMDB0013676	9338		0.18	0.24	0.16	1.39	0.93	0.67		0.184683	0.218247	0.353935	0.651107	0.155841	0.648226	0.755308	0.412014	0.935211	0.501053	0.674369	0.920108		5.5692	0.976	1.356	0.9031		100	86	100	100		Xenobiotics	Drug - Topical Agents	100020837	303-07-1
5988			hydroquinone sulfate	LC/MS neg	35322	C00530	HMDB0240263	161220		0.43	0.76	0.39	1.75	0.91	0.52		0.422163	0.36143	0.535604	0.726638	0.482321	0.755964	0.0700306	0.10352	0.85915	0.483665	0.045111	0.672423		2.768	1.2022	2.1067	1.0928		92	100	100	100		Xenobiotics	Drug - Topical Agents	100001604	123-31-9
6110		Chemical	sulfate*	LC/MS neg	46960	C00059	HMDB01448	5152822		0.94	0.65	0.65	0.69	0.7	1		0.928169	0.52532	0.0755775	0.551308	0.0467534	0.577955	0.00445186	0.03673	0.000602595	0.0408052	0.671228	0.920108		1.3055	1.225	0.8505	0.8544		100	100	100	100		Xenobiotics	Chemical	100002528	14808-79-8
6113			O-sulfo-tyrosine	LC/MS neg	45413		HMDB0155722	514186		0.74	0.81	1.31	1.09	1.77	1.62		0.61179	0.434369	0.816475	0.784767	0.381572	0.738651	0.795793	0.423378	0.205478	0.218776	0.285332	0.795136		1.3555	1.0067	1.0974	1.7805		100	100	100	100		Xenobiotics	Chemical	100005384
6131			3-acetylphenol sulfate	LC/MS neg	48693					0.16	0.26	0.29	1.65	1.81	1.1		0.0511219	0.0961014	0.408671	0.680312	0.389464	0.74276	0.167369	0.168492	0.0678205	0.11469	0.895156	0.942048		3.0226	0.4781	0.7866	0.866		67	29	71	71		Xenobiotics	Chemical	100004326
6176			dimethyl sulfone	LC/MS pos early	43424	C11142	HMDB0004983	6213		0.6	0.88	0.8	1.46	1.33	0.91		0.299389	0.293839	0.947247	0.798344	0.920874	0.87517	0.246064	0.209362	0.165214	0.1887	0.971971	0.952347		1.5012	0.9056	1.3178	1.2037		100	100	100	100		Xenobiotics	Chemical	100004284	67-71-0
6178			ectoine	LC/MS pos early	35651	C06231	HMDB0240650	126041		1.17	0.51	0.68	0.44	0.58	1.34		0.986253	0.539312	0.145661	0.551308	0.528872	0.778204	0.233919	0.203856	0.492398	0.360194	0.247861	0.782573		1.5632	1.8246	0.7951	1.0628		100	100	100	100		Xenobiotics	Chemical	100001635	96702-03-3
6196			methylnaphthyl sulfate (1)*	LC/MS neg	61872					0.51	0.54	0.71	1.06	1.39	1.32		0.104716	0.148297	0.180764	0.579607	0.629994	0.815052	0.382405	0.273967	0.0493311	0.0972406	0.0398262	0.672423		1.8433	0.9373	0.9895	1.3014		100	100	100	100		Xenobiotics	Chemical	100020005
6199			2-naphthol sulfate	LC/MS neg	62520			74428		0.57	1.34	0.97	2.35	1.7	0.72		0.70253	0.460467	0.831452	0.785893	0.922708	0.87517	0.341476	0.259362	0.416165	0.326786	0.786354	0.935015		1.6983	0.9667	2.275	1.6462		100	100	100	100		Xenobiotics	Chemical	100020515
6201			2,4-di-tert-butylphenol	LC/MS neg	64328					0.7	0.94	0.77	1.34	1.1	0.82		0.0210181	0.0600139	0.646735	0.749036	0.142802	0.641688	0.354282	0.262644	0.723442	0.439086	0.166089	0.734339		1.2045	0.8398	1.1282	0.9276		100	100	100	100		Xenobiotics	Chemical	100021918	96-76-4
6213			benzoylcarnitine*	LC/MS pos early	43265					1.01	0.47	0.4	0.47	0.39	0.84		0.836421	0.495324	0.270828	0.596776	0.145692	0.641688	0.44073	0.294974	0.258373	0.255097	0.225139	0.750316		0.9808	0.9938	0.4632	0.3881		58	57	43	29		Xenobiotics	Chemical	100004555	105450-08-6
6214			perfluorooctanesulfonate (PFOS)	LC/MS polar	57564	C18142	HMDB0059586	74483		0.2	0.19	0.24	0.95	1.18	1.24		0.246583	0.257929	0.298832	0.618792	0.577574	0.794827	0.496138	0.321248	0.197602	0.213527	0.0834299	0.703731		5.2691	1.0606	1.0066	1.2522		100	100	100	100		Xenobiotics	Chemical	100010955	1763-23-1
6242			1,2,3-benzenetriol sulfate (2)	LC/MS neg	48762		HMDB0060018 HMDB0060016	54110629;92013662		0.35	0.39	0.24	1.12	0.67	0.6		0.280199	0.281601	0.842295	0.785893	0.345061	0.72078	0.109372	0.131673	0.743499	0.448551	0.483705	0.866632		2.219	0.7817	0.8751	0.5258		58	14	86	57		Xenobiotics	Chemical	100006374
6245			3-hydroxypyridine sulfate	LC/MS neg	48448					0.04	0.29	1.17	7.5	30.61	4.08		0.000113626	0.00344547	0.141328	0.551308	0.991239	0.886801	0.00362898	0.0358894	0.00258692	0.0408052	0.136291	0.734339		2.2891	0.0875	0.6561	2.6787		92	57	86	86		Xenobiotics	Chemical	100006098	1955-23-3
6259			6-hydroxyindole sulfate	LC/MS neg	48698		HMDB0000682	122198196		1.1	1.66	1.61	1.51	1.47	0.97		0.177768	0.21579	0.197391	0.579607	0.174161	0.648226	0.745651	0.411706	0.70303	0.433832	0.993796	0.954738		1.1699	1.2848	1.9416	1.8829		100	100	100	100		Xenobiotics	Chemical	100006260
6263			thioproline	LC/MS pos early	53231		HMDB0062164	93176		1.34	1.24	1.22	0.92	0.91	0.98		0.039466	0.0862657	0.0987474	0.551308	0.303874	0.711693	0.397923	0.278673	0.421738	0.329104	0.590343	0.920108		0.8703	1.1666	1.0791	1.0597		100	100	100	100		Xenobiotics	Chemical	100009232	34592-47-4
6276			5-hydroxy-2-methylpyridine sulfate	LC/MS neg	63230					0.04	0.05	0.09	1.33	2.22	1.67		0.00653848	0.0316784	0.0149646	0.4917	0.0558792	0.577955	0.117956	0.136721	0.102925	0.14004	0.182561	0.734339		4.3296	0.173	0.2301	0.3833		67	0	43	43		Xenobiotics	Chemical	100020973
6278			3-hydroxy-2-methylpyridine sulfate	LC/MS neg	63227					0.1	0.32	1.19	3.07	11.34	3.69		0.00765619	0.0353392	0.482929	0.716481	0.572302	0.794827	0.00572047	0.03673	0.0174486	0.0663066	0.14867	0.734339		2.5938	0.2719	0.8351	3.0822		75	43	86	71		Xenobiotics	Chemical	100020975
6283			3,5-dichloro-2,6-dihydroxybenzoic acid	LC/MS polar	63589			24721632		0.67	0.58	0.41	0.87	0.62	0.71		0.536275	0.411745	0.261198	0.595292	0.0720276	0.577955	0.35083	0.262644	0.0959392	0.136198	0.0171385	0.672423		1.4163	0.9428	0.8194	0.5835		92	100	100	86		Xenobiotics	Chemical	100021324
6284			3-bromo-5-chloro-2,6-dihydroxybenzoic acid*	LC/MS polar	63681			134581543		0.97	0.77	0.66	0.8	0.68	0.85		0.999566	0.54266	0.492232	0.716481	0.254526	0.682672	0.192046	0.183572	0.115959	0.148162	0.099737	0.703731		0.8988	0.872	0.6956	0.5918		75	86	100	57		Xenobiotics	Chemical	100021707
6291			2,4-dichlorophenol sulfate	LC/MS neg	48459			9837697		1.45	1.92	8.04	1.32	5.55	4.2		0.725167	0.468289	0.763658	0.778124	0.458223	0.753573	0.998345	0.479281	0.322117	0.286511	0.178903	0.734339		1.1078	1.606	2.1236	8.909		92	86	86	86		Xenobiotics	Chemical	100006263	3233-63-4
6372			perfluorohexanesulfonate (PFHxS)	LC/MS polar	64623		HMDB0094700			0.04	0.03	0.03	0.77	0.73	0.95		0.132738	0.175292	0.077449	0.551308	0.0746169	0.577955	0.0260855	0.0605338	0.095289	0.136043	0.827278	0.938045		37.6248	1.6522	1.2783	1.212		83	71	71	57		Xenobiotics	Chemical	100022172	355-46-4
6447	Partially Characterized Molecules	Partially Characterized Molecules	pentose acid*	LC/MS polar	63264	C00803	HMDB0000892	7991		0.18	0.58	0.65	3.16	3.56	1.12		0.0176617	0.0552045	0.863301	0.785893	0.845637	0.868761	0.0208432	0.0555515	0.0264979	0.0737224	0.964257	0.951737		2.2073	0.4043	1.2783	1.438		83	57	100	86		Partially Characterized Molecules	Partially Characterized Molecules	100021467
6454			branched-chain, straight-chain, or cyclopropyl 10:1 fatty acid (1)*	LC/MS neg	63615					1.39	0.89	1.01	0.64	0.72	1.14		0.374408	0.332957	0.601848	0.739018	0.987632	0.885407	0.0312316	0.0666151	0.0766641	0.120656	0.325738	0.81569		0.9247	1.2867	0.8186	0.9327		92	86	86	86		Partially Characterized Molecules	Partially Characterized Molecules	100021666
6468			bilirubin degradation product, C16H18N2O5 (2)**	LC/MS neg	64404					1.42	0.96	0.86	0.67	0.6	0.89		0.368389	0.329726	0.827658	0.785893	0.906082	0.87517	0.421187	0.287635	0.506943	0.367093	0.908304	0.942048		1.0533	1.5002	1.0117	0.9008		50	100	71	71		Partially Characterized Molecules	Partially Characterized Molecules	100022004
6470			bilirubin degradation product, C17H18N2O4 (2)**	LC/MS neg	64407					0.97	0.7	0.54	0.72	0.56	0.78		0.633134	0.443561	0.513762	0.720287	0.187378	0.652763	0.242627	0.208318	0.0707748	0.116999	0.226674	0.750316		1.3481	1.3014	0.9399	0.7294		100	100	86	100		Partially Characterized Molecules	Partially Characterized Molecules	100022006
6471			bilirubin degradation product, C17H18N2O4 (3)**	LC/MS neg	64408					0.86	0.71	0.51	0.82	0.6	0.73		0.793496	0.483578	0.594887	0.738422	0.190085	0.652763	0.409492	0.284219	0.106421	0.141219	0.183845	0.734339		1.3061	1.1267	0.9218	0.6704		92	100	86	86		Partially Characterized Molecules	Partially Characterized Molecules	100022007
6472			bilirubin degradation product, C17H20N2O5 (1)**	LC/MS neg	64405					0.97	0.69	0.72	0.71	0.74	1.04		0.847451	0.500174	0.523018	0.722489	0.444509	0.747601	0.422749	0.288211	0.331008	0.290109	0.69332	0.920108		1.3214	1.2852	0.9141	0.9479		92	100	86	100		Partially Characterized Molecules	Partially Characterized Molecules	100022008
6473			bilirubin degradation product, C17H20N2O5 (2)**	LC/MS neg	64406					1.01	0.74	0.68	0.73	0.68	0.93		0.949419	0.530639	0.628818	0.743608	0.348001	0.72078	0.383635	0.274307	0.0725855	0.117988	0.370924	0.819254		1.4994	1.5071	1.1036	1.023		92	100	86	100		Partially Characterized Molecules	Partially Characterized Molecules	100022009
6476			glutamine_degradant*	LC/MS pos early	46225					0.47	0.07	0.14	0.15	0.29	1.98		0.892465	0.516923	0.000704243	0.125768	0.0219398	0.498969	0.00536635	0.03673	0.0731723	0.117988	0.0151061	0.672423		6.2783	2.97	0.4309	0.8535		100	100	100	100		Partially Characterized Molecules	Partially Characterized Molecules	100001540	2353-44-8
	N/A	N/A	X-07765	LC/MS neg	46590					1.28	0.86	1.29	0.67	1.01	1.5		0.138671	0.180531	0.230447	0.579607	0.228341	0.682672	0.164596	0.167141	0.738722	0.446205	0.860859	0.942048		1.1946	1.5336	1.0286	1.5456		100	100	100	100		N/A	N/A
			X-11478	LC/MS neg	46602					0.35	0.32	0.33	0.91	0.95	1.04		0.100177	0.144943	0.0774366	0.551308	0.0717739	0.577955	0.995628	0.47912	0.770275	0.458106	0.748338	0.923804		1.9202	0.6753	0.6174	0.6422		58	71	57	71		N/A	N/A
			X-11787	LC/MS pos early	33132					1.35	1.37	1.39	1.01	1.02	1.01		0.0660864	0.112249	0.131431	0.551308	0.130332	0.638125	0.855566	0.440139	0.959447	0.507757	0.90478	0.942048		0.8602	1.1649	1.1777	1.1918		100	100	100	100		N/A	N/A
			X-11795	LC/MS pos early	33140					1.2	1.54	0.92	1.29	0.77	0.6		0.181615	0.218036	0.0913467	0.551308	0.556087	0.783984	0.311155	0.242055	0.335633	0.291806	0.0674695	0.703731		1.2478	1.4986	1.9267	1.149		100	100	100	100		N/A	N/A
			X-11843	LC/MS neg	46466					2.26	0.22	0.19	0.1	0.09	0.89		0.457324	0.379014	0.327045	0.632531	0.296058	0.705044	0.800465	0.42492	0.851648	0.482502	0.896697	0.942048		6.0851	13.7303	1.3198	1.1763		100	100	100	100		N/A	N/A
			X-11850	LC/MS neg	46507					8.39	1.05	0.66	0.13	0.08	0.62		0.953764	0.531618	0.821834	0.785148	0.916904	0.87517	0.902694	0.455357	0.868311	0.485021	0.676052	0.920108		0.6935	5.8157	0.7301	0.4545		42	57	43	57		N/A	N/A
			X-11852	LC/MS neg	46521					0.69	1.38	1.43	1.99	2.06	1.03		0.480849	0.387167	0.353319	0.651107	0.424749	0.744374	0.00400596	0.0359854	0.0139958	0.0622439	0.850197	0.942048		1.4149	0.9808	1.9552	2.0224		100	100	100	100		N/A	N/A
			X-12007	LC/MS neg	46610					0.07	0.35	1.22	5.31	18.22	3.43		0.000663661	0.00898899	0.300702	0.618792	0.59034	0.801364	0.0174405	0.0527163	0.0684975	0.114976	0.836244	0.94052		1.8428	0.1231	0.6539	2.2428		83	0	71	86		N/A	N/A
			X-12027	LC/MS neg	47510					0.26	1.18	1.1	4.49	4.17	0.93		0.0283618	0.0708881	0.54456	0.726638	0.716681	0.849177	0.0174743	0.0527163	0.0556563	0.103584	0.858147	0.942048		1.1544	0.3045	1.3658	1.2688		58	29	86	86		N/A	N/A
			X-12097	LC/MS pos early	47685					0.16	0.2	0.31	1.21	1.91	1.58		0.0123295	0.0461019	0.0305817	0.519117	0.182951	0.652763	0.0799014	0.110146	0.0169476	0.0663066	0.0492754	0.703731		3.6517	0.594	0.7177	1.1337		92	57	71	71		N/A	N/A
			X-12100	LC/MS pos early	47687					0.87	0.92	0.9	1.05	1.04	0.98		0.52	0.402904	0.737566	0.773858	0.67149	0.832656	0.771437	0.416058	0.881967	0.486284	0.856534	0.942048		1.1725	1.022	1.0769	1.0592		100	100	100	100		N/A	N/A
			X-12101	LC/MS pos early	47642					0.72	0.59	0.47	0.82	0.64	0.78		0.758742	0.475222	0.290085	0.616851	0.0707371	0.577955	0.120481	0.137264	0.0376694	0.0841361	0.107953	0.703731		1.8931	1.3676	1.1237	0.8811		100	100	100	100		N/A	N/A
			X-12127	LC/MS pos early	47702					1.15	0.91	0.92	0.79	0.8	1.01		0.950301	0.530639	0.434285	0.689832	0.497502	0.760651	0.19619	0.184461	0.062025	0.10937	0.823883	0.936955		1.2214	1.4001	1.1059	1.1206		100	100	71	86		N/A	N/A
			X-12216	LC/MS neg	46613					0.47	0.64	0.7	1.36	1.49	1.09		0.447717	0.374803	0.784128	0.778124	0.436165	0.744947	0.146855	0.156616	0.0592323	0.107076	0.353211	0.81569		1.8072	0.8532	1.1628	1.27		83	100	100	100		N/A	N/A
			X-12262	LC/MS neg	47914					2.62	0.44	0.22	0.17	0.09	0.51		0.663346	0.450662	0.514157	0.720287	0.113959	0.638125	0.998302	0.479281	0.570677	0.388607	0.399423	0.825559		3.5346	9.2509	1.5452	0.7879		67	86	86	86		N/A	N/A
			X-12306	LC/MS neg	47917					2.5	1.11	1.51	0.44	0.6	1.36		0.450505	0.375353	0.409732	0.680312	0.768523	0.854631	0.854398	0.440023	0.312355	0.282326	0.654159	0.920108		0.6092	1.5237	0.6764	0.9213		58	71	100	57		N/A	N/A
			X-12407	LC/MS neg	46615					0.15	0.36	0.86	2.4	5.78	2.41		0.0593805	0.105613	0.48062	0.716434	0.356598	0.72078	0.274571	0.2253	0.0145987	0.0625165	0.0045066	0.672423		2.7234	0.4036	0.967	2.3347		58	43	71	86		N/A	N/A
			X-12411	LC/MS neg	46616					0.39	0.86	0.78	2.2	1.98	0.9		0.0448525	0.0899982	0.819087	0.785148	0.600035	0.805222	0.0950671	0.12098	0.0183328	0.0677433	0.617907	0.920108		1.7169	0.6743	1.4801	1.338		100	100	100	100		N/A	N/A
			X-12680	LC/MS pos early	47437					0.57	2.17	1.7	3.8	2.97	0.78		0.300006	0.293839	0.0767169	0.551308	0.264348	0.683971	0.00378186	0.0358894	0.0268206	0.0737224	0.516604	0.876851		1.2134	0.6931	2.6338	2.0577		100	100	100	100		N/A	N/A
			X-12689	LC/MS pos early	47719					0.34	0.35	0.28	1.03	0.83	0.8		0.0872547	0.131689	0.106818	0.551308	0.0300259	0.552106	0.726253	0.40386	0.465013	0.346656	0.326982	0.81569		2.3789	0.8002	0.8269	0.6633		83	86	86	86		N/A	N/A
			X-12707	LC/MS neg	47929					0.46	0.73	0.62	1.59	1.36	0.86		0.0414391	0.0875586	0.657003	0.751486	0.347536	0.72078	0.00745445	0.0378015	0.0864961	0.128605	0.0776368	0.703731		1.5975	0.7315	1.1647	0.9964		100	100	100	100		N/A	N/A
			X-12726	LC/MS neg	47936					0.75	0.86	0.9	1.16	1.21	1.04		0.607412	0.433006	0.799741	0.780057	0.879792	0.872229	0.181978	0.178206	0.28989	0.272624	0.942418	0.94919		1.2986	0.9682	1.1214	1.1681		100	100	100	100		N/A	N/A
			X-12729	LC/MS neg	46623					0.92	1.11	1.13	1.21	1.24	1.02		0.782031	0.480976	0.707709	0.768423	0.200119	0.662551	0.749851	0.412014	0.318383	0.285209	0.289077	0.795136		0.9576	0.8765	1.0589	1.0843		83	100	100	100		N/A	N/A
			X-12730	LC/MS neg	47937					0.12	0.48	1.01	4.15	8.72	2.1		0.00863419	0.0375725	0.967736	0.800749	0.560323	0.786109	0.00211611	0.0274573	0.00276725	0.0408052	0.392655	0.825559		2.4857	0.2869	1.1917	2.5018		92	43	86	86		N/A	N/A
			X-12731	LC/MS neg	47938					0.28	0.72	1.11	2.55	3.94	1.54		0.808887	0.487768	0.122941	0.551308	0.404763	0.744374	0.0554213	0.0897148	0.334544	0.291377	0.656941	0.920108		2.521	0.7099	1.8114	2.7963		67	86	100	100		N/A	N/A
			X-12818	LC/MS neg	47943					0.46	0.46	0.46	1.01	1	0.99		0.107375	0.15085	0.116964	0.551308	0.107375	0.631266	0.355918	0.262644			0.355918	0.81569		1.0389	0.4743	0.4799	0.4743		33	0	14	0		N/A	N/A
			X-12847	LC/MS neg	46364					0.72	0.85	0.66	1.18	0.91	0.77		0.576124	0.423858	0.654047	0.750909	0.398687	0.744374	0.908217	0.457156	0.651142	0.415793	0.199549	0.743264		1.9033	1.3756	1.6229	1.2522		100	100	100	100		N/A	N/A
			X-13507	LC/MS pos early	47439					0.58	0.67	0.89	1.17	1.54	1.32		0.692636	0.458938	0.859828	0.785893	0.594755	0.802324	0.190252	0.183236	0.0108159	0.0556562	0.413418	0.836554		1.5795	0.9114	1.062	1.4045		100	100	100	100		N/A	N/A
			X-13553	LC/MS neg	47959					0.47	0.81	0.66	1.72	1.4	0.82		0.0518093	0.0967054	0.955753	0.798344	0.438424	0.74548	0.00385058	0.0358894	0.0765237	0.120656	0.0229745	0.672423		1.6572	0.7807	1.3413	1.0958		100	100	100	100		N/A	N/A
			X-13695	LC/MS neg	47962					0.04	0.05	0.08	1.32	2.12	1.61		0.0237142	0.0639119	0.0623553	0.551308	0.126031	0.638125	0.556454	0.3429	0.389803	0.314943	0.629186	0.920108		15.6737	0.5713	0.7535	1.2122		83	71	86	86		N/A	N/A
			X-13729	LC/MS neg	47971					0.77	0.71	0.71	0.91	0.91	1		0.911394	0.519905	0.63309	0.743608	0.593964	0.802324	0.487404	0.317535	0.652439	0.416093	0.918343	0.942812		1.1561	0.8946	0.8161	0.8151		58	71	71	71		N/A	N/A
			X-13866	LC/MS neg	46417					1.06	0.78	0.71	0.74	0.67	0.9		0.956689	0.531618	0.990736	0.808857	0.778811	0.85544	0.905898	0.45648	0.673885	0.422268	0.584666	0.920108		1.3443	1.4263	1.0543	0.949		50	71	57	57		N/A	N/A
			X-14056	LC/MS pos early	46632					2.02	1.48	0.99	0.73	0.49	0.67		0.0101661	0.0414397	0.0817286	0.551308	0.927068	0.87517	0.111966	0.13342	0.0231257	0.0732182	0.0192381	0.672423		0.8337	1.6813	1.2342	0.8279		100	100	100	100		N/A	N/A
			X-14837	LC/MS pos early	48359					2.9	2.3	1.8	0.79	0.62	0.78		0.602063	0.432697	0.0708365	0.551308	0.0777683	0.577955	0.269015	0.222546	0.32873	0.289981	0.743491	0.923804		0.8911	2.5811	2.0453	1.6004		75	86	100	100		N/A	N/A
			X-15220	LC/MS neg	46658					3.89	0.29	0.14	0.07	0.04	0.49		0.730642	0.469529	0.295481	0.618352	0.0362773	0.577955	0.269659	0.222546	0.175778	0.197588	0.16605	0.734339		1.044	4.0563	0.2978	0.1462		42	29	43	14		N/A	N/A
			X-15245	LC/MS neg	46661					3.05	2.07	0.83	0.68	0.27	0.4		0.00576344	0.0295579	0.0651614	0.551308	0.912628	0.87517	0.218428	0.196213	0.0117697	0.0574256	0.00328158	0.672423		0.8079	2.465	1.6698	0.6732		83	100	100	100		N/A	N/A
			X-15503	LC/MS neg	46977					0.47	0.77	0.8	1.63	1.68	1.03		0.00416488	0.0236564	0.364853	0.663478	0.42389	0.744374	0.0438057	0.0769257	0.0578481	0.105331	0.979483	0.952937		1.3566	0.6443	1.0487	1.0842		100	100	100	100		N/A	N/A
			X-15728	LC/MS neg	46666					0.53	0.39	0.52	0.73	0.99	1.35		0.658779	0.449602	0.422828	0.681928	0.358473	0.72078	0.694137	0.393019	0.406172	0.321763	0.710954	0.920108		2.5985	1.374	1.0058	1.3589		58	71	86	86		N/A	N/A
			X-16124	LC/MS neg	46461					1.78	1.63	3.13	0.92	1.76	1.92		0.660826	0.450123	0.666658	0.754438	0.639399	0.818713	0.971488	0.475155	0.729965	0.441978	0.807682	0.935671		7.111	12.637	11.6137	22.2584		58	43	43	29		N/A	N/A
			X-17010	LC/MS neg	47993					0.42	0.84	0.7	1.99	1.66	0.83		0.0580277	0.103906	0.897216	0.789259	0.687894	0.84334	0.1135	0.134562	0.0775628	0.121053	0.8824	0.942048		1.6831	0.7109	1.4162	1.1774		92	100	100	100		N/A	N/A
			X-17335	LC/MS pos late	47820					0.98	0.69	0.51	0.71	0.53	0.74		0.653265	0.448737	0.251579	0.592053	0.0451458	0.577955	0.0347841	0.069743	0.00583931	0.0449856	0.151119	0.734339		1.242	1.2141	0.8586	0.638		100	100	100	86		N/A	N/A
			X-17351	LC/MS neg	48001					0.22	0.73	0.35	3.29	1.56	0.47		0.00187243	0.0137374	0.614392	0.742984	0.0332746	0.568401	0.0427762	0.0762646	0.0835243	0.126477	0.119857	0.711613		1.7201	0.3806	1.2534	0.5937		75	29	71	71		N/A	N/A
			X-17438	LC/MS neg	46705					1.04	0.82	0.75	0.79	0.72	0.92		0.899114	0.517934	0.717826	0.773608	0.448355	0.748843	0.415489	0.285412	0.280939	0.268924	0.472477	0.866632		0.9611	1.0028	0.792	0.7253		50	43	71	29		N/A	N/A
			X-17676	LC/MS neg	46970					0.21	0.56	0.58	2.61	2.7	1.04		0.0011723	0.0110258	0.433645	0.689832	0.479003	0.755964	0.00147113	0.0274573	0.00756491	0.0469288	0.975353	0.952937		2.0434	0.4357	1.1362	1.178		100	86	100	86		N/A	N/A
			X-18345	LC/MS neg	47342					0.52	1.9	1.77	3.67	3.41	0.93		0.182689	0.218247	0.0788484	0.551308	0.467701	0.755964	0.0148138	0.049076	0.0392107	0.0856749	0.466221	0.866632		1.2945	0.6706	2.4621	2.2887		92	100	100	100		N/A	N/A
			X-18886	LC/MS neg	48047					0.94	0.93	1.09	0.99	1.16	1.18		0.906313	0.519406	0.894393	0.789259	0.969096	0.882192	0.681551	0.388246	0.885532	0.486284	0.711043	0.920108		1.296	1.22	1.2053	1.4184		83	100	86	86		N/A	N/A
			X-18913	LC/MS neg	46695					0.44	0.78	0.76	1.78	1.73	0.97		0.0352178	0.08011	0.689097	0.765903	0.461831	0.75574	0.103803	0.127353	0.241952	0.244178	0.528897	0.884446		1.6649	0.7279	1.2992	1.2575		100	100	100	100		N/A	N/A
			X-19438	LC/MS neg	46261					2.17	1.5	0.76	0.69	0.35	0.51		0.0135451	0.0493131	0.335361	0.639031	0.573852	0.794827	0.0390006	0.0744839	0.0129909	0.0612013	0.111218	0.703731		0.8117	1.7625	1.2153	0.6166		58	100	100	71		N/A	N/A
			X-21258	LC/MS neg	46259					0.19	0.19	0.17	1.02	0.91	0.9		0.053622	0.0980026	0.0602309	0.551308	0.0503394	0.577955	0.556255	0.3429	0.266347	0.260412	0.342492	0.81569		4.8338	0.8972	0.9113	0.8205		100	100	100	100		N/A	N/A
			X-21286	LC/MS neg	46295					1.2	1.33	1.68	1.11	1.4	1.26		0.507801	0.397413	0.326629	0.632531	0.110585	0.638125	0.696951	0.393308	0.448228	0.339752	0.44757	0.855403		0.7903	0.9497	1.0545	1.3304		75	100	86	100		N/A	N/A
			X-21310	LC/MS neg	46354					1.14	1.25	1.22	1.1	1.07	0.97		0.211122	0.237788	0.29478	0.618352	0.265597	0.683971	0.902479	0.455357	0.913032	0.494441	0.978409	0.952937		0.8516	0.9666	1.0645	1.036		100	100	100	100		N/A	N/A
			X-21315	LC/MS neg	46359					1.25	2.8	17.36	2.23	13.84	6.19		0.64519	0.445508	0.637597	0.743899	0.537742	0.778204	0.757676	0.412014	0.460979	0.345251	0.323849	0.81569		15.2983	19.188	42.8849	265.567		92	86	86	86		N/A	N/A
			X-21319	LC/MS neg	46363					0.69	0.58	0.53	0.85	0.77	0.91		0.349798	0.323435	0.227371	0.579607	0.1313	0.638125	0.912446	0.457804	0.573298	0.389337	0.674079	0.920108		1.2458	0.8572	0.7287	0.663		75	43	57	43		N/A	N/A
			X-21353	LC/MS neg	46398					0.84	0.51	0.34	0.61	0.41	0.67		0.570243	0.422203	0.420743	0.681928	0.13016	0.638125	0.175607	0.173789	0.0504672	0.0983029	0.221478	0.743624		1.407	1.1774	0.7172	0.484		83	100	86	86		N/A	N/A
			X-21742	LC/MS neg	46911					0.16	0.85	0.23	5.39	1.47	0.27		0.111175	0.153333	0.333631	0.639019	0.259886	0.682672	0.653911	0.379244	0.489986	0.360002	0.997587	0.954738		11.5263	1.8216	9.8097	2.6749		100	100	100	86		N/A	N/A
			X-21796	LC/MS neg	46972					1.49	0.77	1.3	0.52	0.88	1.69		0.776111	0.479498	0.243489	0.587269	0.579415	0.79483	0.376004	0.270626	0.91406	0.494465	0.297514	0.795136		1.205	1.7933	0.9312	1.5693		100	100	100	100		N/A	N/A
			X-22162	LC/MS pos early	47417					0.96	1.16	0.94	1.2	0.98	0.82		0.947896	0.530639	0.248776	0.592053	0.980984	0.882192	0.0123003	0.0464461	0.785587	0.463374	0.0111232	0.672423		0.963	0.9258	1.1135	0.9081		100	100	100	100		N/A	N/A
			X-22776	LC/MS neg	48081					0.96	0.95	0.86	0.99	0.9	0.91		0.909817	0.519783	0.934755	0.793437	0.798111	0.860642	0.801769	0.425105	0.912503	0.494441	0.814875	0.935738		0.8005	0.7699	0.7613	0.692		58	71	71	57		N/A	N/A
			X-23137	LC/MS neg	48707					0.73	0.75	0.55	1.03	0.75	0.73		0.345721	0.322086	0.519019	0.720287	0.0944668	0.590154	0.520858	0.331424	0.8451	0.480977	0.215934	0.743264		1.5048	1.1055	1.1356	0.8245		92	100	100	100		N/A	N/A
			X-23138	LC/MS neg	48708					0.63	0.61	0.6	0.96	0.96	1		0.183244	0.218247	0.153715	0.568199	0.130389	0.638125	0.790837	0.421702	0.876178	0.486005	0.661188	0.920108		1.6023	1.006	0.9703	0.9674		83	100	100	86		N/A	N/A
			X-23139	LC/MS neg	48710					0.58	0.83	0.66	1.43	1.14	0.8		0.0759493	0.121574	0.561365	0.726638	0.133211	0.638125	0.0405612	0.0744839	0.252952	0.251226	0.198555	0.743264		1.3327	0.7695	1.1039	0.8795		100	100	100	100		N/A	N/A
			X-23140	LC/MS neg	48711					0.74	0.74	0.65	1.01	0.88	0.87		0.786033	0.481684	0.709319	0.768423	0.353585	0.72078	0.835299	0.434906	0.407848	0.321763	0.340546	0.81569		1.331	0.9795	0.9897	0.8651		100	100	100	100		N/A	N/A
			X-23276	LC/MS neg	48972					0.53	0.78	1.05	1.45	1.96	1.35		0.0254138	0.0672353	0.386924	0.67121	0.990681	0.886801	0.0622321	0.0962565	0.0769006	0.120656	0.241146	0.770853		1.3832	0.7388	1.0736	1.4455		100	100	100	100		N/A	N/A
			X-23536	LC/MS neg	49412					0.79	1.21	0.9	1.53	1.14	0.74		0.687134	0.457548	0.578011	0.733209	0.756306	0.854631	0.110711	0.132943	0.919452	0.496847	0.0129111	0.672423		1.2087	0.9545	1.4635	1.0851		100	100	100	100		N/A	N/A	0
			X-23587	LC/MS pos early	49463					0.5	1.45	1.89	2.92	3.82	1.31		0.16817	0.208041	0.393541	0.672368	0.689854	0.843715	0.138476	0.151869	0.285513	0.271259	0.631908	0.920108		1.2466	0.6183	1.8066	2.3611		92	100	100	100		N/A	N/A
			X-23593	LC/MS pos early	49469					0.62	0.82	0.89	1.31	1.42	1.08		0.00642978	0.0314486	0.305069	0.620283	0.605791	0.80654	0.0304781	0.0662173	0.0320571	0.0793605	0.449924	0.855403		1.3147	0.8211	1.0769	1.1646		100	100	100	100		N/A	N/A
			X-23639	LC/MS pos early	49515					1.25	1.35	1.09	1.08	0.87	0.81		0.343973	0.321333	0.1019	0.551308	0.24971	0.682672	0.293776	0.233205	0.699202	0.43327	0.179467	0.734339		0.9207	1.1547	1.2449	1.0024		100	100	100	100		N/A	N/A
			X-23641	LC/MS pos late	49517					0.76	0.5	0.49	0.66	0.64	0.98		0.580323	0.425761	0.0411349	0.551308	0.0437399	0.577955	0.188366	0.18217	0.146692	0.175257	0.664381	0.920108		1.5901	1.2153	0.7997	0.7818		100	100	100	100		N/A	N/A
			X-23654	LC/MS pos early	49531					0.76	0.64	0.67	0.84	0.89	1.05		0.412036	0.355642	0.113637	0.551308	0.172302	0.648226	0.0797236	0.110146	0.387114	0.314286	0.961895	0.951529		1.4611	1.1109	0.9323	0.9833		100	100	100	86		N/A	N/A
			X-23662	LC/MS pos early	49539					0.25	0.16	0.17	0.63	0.68	1.09		0.739622	0.470152	0.199195	0.579607	0.302123	0.709515	0.0505456	0.08493	0.15023	0.177224	0.211475	0.743264		3.7852	0.9428	0.5912	0.6446		58	100	57	71		N/A	N/A
			X-23739	LC/MS pos early	49637					0.67	0.73	0.79	1.09	1.17	1.08		0.0319403	0.0761977	0.0951594	0.551308	0.204887	0.662551	0.521737	0.331424	0.51084	0.367796	0.794097	0.935671		1.3203	0.8834	0.9621	1.0374		100	100	100	100		N/A	N/A
			X-23782	LC/MS pos late	49681					0.66	0.76	0.7	1.16	1.06	0.91		0.63741	0.444495	0.842434	0.785893	0.791778	0.860642	0.243499	0.208318	0.583704	0.394272	0.300134	0.795346		1.3808	0.9098	1.0545	0.9604		92	100	100	100		N/A	N/A
			X-23997	LC/MS pos early	52025					0.63	1.38	1.72	2.21	2.75	1.24		0.33981	0.320536	0.20606	0.579607	0.0580959	0.577955	0.0389968	0.0744839	0.0325012	0.0795055	0.227756	0.751223		1.0275	0.6439	1.4217	1.7698		92	100	100	100		N/A	N/A
			X-24295	LC/MS neg	52483					2.57	1.77	0.68	0.69	0.26	0.38		0.027109	0.0698536	0.145413	0.551308	0.906667	0.87517	0.0937537	0.120787	0.0038844	0.0408052	0.0187213	0.672423		0.8916	2.2888	1.5802	0.6057		75	100	100	100		N/A	N/A
			X-24344	LC/MS neg	52540					1.64	2.16	1.8	1.32	1.1	0.83		0.296547	0.291708	0.157448	0.57132	0.172947	0.648226	0.107988	0.13068	0.704651	0.433971	0.623622	0.920108		0.5575	0.9127	1.202	1.0022		67	71	86	86		N/A	N/A
			X-24345	LC/MS neg	52541					0.28	0.31	0.26	1.14	0.93	0.82		0.100701	0.144943	0.12097	0.551308	0.0740598	0.577955	0.765375	0.414272	0.69633	0.432023	0.945535	0.94919		4.0779	1.1231	1.2792	1.0431		100	100	100	100		N/A	N/A
			X-24411	LC/MS pos early	52640					1	1.86	1.44	1.85	1.43	0.77		0.880508	0.513375	0.234134	0.579607	0.207748	0.662551	0.285523	0.230348	0.201972	0.21641	0.781188	0.931556		0.9517	0.9562	1.7717	1.3665		100	100	100	100		N/A	N/A
			X-24515	LC/MS neg	52836					0.91	0.9	0.89	0.99	0.98	1		0.474088	0.385511	0.389872	0.672368	0.403205	0.744374	0.47239	0.311227	0.445302	0.338983	0.939479	0.94919		1.0344	0.9411	0.9279	0.924		100	100	100	100		N/A	N/A	0
			X-24518	LC/MS pos early	52839					0.2	0.27	0.3	1.36	1.48	1.09		0.0348507	0.080041	0.0614943	0.551308	0.0738022	0.577955	0.0175792	0.0527163	0.00396996	0.0408052	0.376235	0.819254		3.4279	0.6901	0.9351	1.0217		100	100	100	100		N/A	N/A
			X-24623	LC/MS neg	53050					0.43	1.56	0.81	3.64	1.9	0.52		0.998116	0.54243	0.797282	0.780057	0.453364	0.752029	0.800511	0.42492	0.386867	0.314286	0.711636	0.920108		2.2941	0.9816	3.5737	1.8622		75	100	71	100		N/A	N/A
			X-24742	LC/MS pos early	53227					1.82	4.41	3.19	2.42	1.75	0.72		0.351866	0.323435	0.108894	0.551308	0.235213	0.682672	0.0253633	0.0601398	0.377098	0.310163	0.290928	0.795136		2.6221	4.7844	11.5668	8.3557		83	86	100	86		N/A	N/A
			X-24935	LC/MS neg	57604					0.98	1.41	1.54	1.44	1.57	1.09		0.568599	0.422203	0.580236	0.733209	0.747037	0.854631	0.171533	0.170843	0.292112	0.272624	0.699084	0.920108		0.8751	0.8554	1.2313	1.3441		100	100	100	100		N/A	N/A	0
			X-24937	LC/MS neg	57606					1.08	1.15	1.17	1.07	1.09	1.02		0.835853	0.495324	0.442389	0.694802	0.549919	0.782356	0.366742	0.266423	0.407809	0.321763	0.821944	0.936955		1.0972	1.1803	1.2602	1.2835		100	100	100	100		N/A	N/A	0
			X-25109	LC/MS pos early	61682					3.29	0.91	0.83	0.28	0.25	0.91		0.104176	0.148297	0.428123	0.685551	0.29748	0.705706	0.00597602	0.03673	0.00223787	0.0408052	0.418392	0.840525		1.1192	3.6788	1.022	0.9258		100	100	100	100		N/A	N/A
			X-25247	LC/MS neg	62464					0.12	0.07	0.03	0.6	0.25	0.42		0.16041	0.200793	0.0531199	0.551308	0.00930977	0.491602	0.515069	0.328683	0.243418	0.245149	0.456424	0.857653		8.5438	0.989	0.5889	0.2446		75	57	57	43		N/A	N/A
			X-25279	LC/MS neg	62521					1	0.96	1.23	0.96	1.23	1.29		0.965511	0.532935	0.809715	0.782923	0.880879	0.872229	0.386425	0.275159	0.707066	0.434394	0.054414	0.703731		0.9704	0.9659	0.9278	1.1925		100	100	100	100		N/A	N/A
			X-25343	LC/MS pos early	62636					1.63	1.07	0.65	0.66	0.4	0.61		0.0428365	0.0887367	0.498265	0.716481	0.48359	0.755964	0.0259933	0.0605338	0.00125216	0.0408052	0.0205376	0.672423		1.0759	1.7515	1.1537	0.7009		100	100	100	100		N/A	N/A	0
			X-25371	LC/MS neg	62664					0.52	0.62	0.6	1.2	1.15	0.96		0.158284	0.199075	0.366409	0.664779	0.357346	0.72078	0.772236	0.416058	0.239087	0.243223	0.844389	0.940599		1.5991	0.8271	0.9889	0.9525		100	100	100	100		N/A	N/A	0
			X-25442	LC/MS neg	62764					0.56	0.62	0.5	1.11	0.9	0.81		0.172991	0.211528	0.264961	0.595292	0.0907806	0.577955	0.873005	0.446162	0.496432	0.361566	0.408467	0.833183		1.5624	0.8728	0.9685	0.7832		100	100	100	100		N/A	N/A
			X-25877	LC/MS pos early	63777					1.26	0.94	0.83	0.75	0.66	0.89		0.435539	0.369885	0.621142	0.742984	0.496847	0.760651	0.247002	0.209778	0.0770685	0.120656	0.906556	0.942048		1.4594	1.8361	1.3732	1.2167		100	100	100	100		N/A	N/A	0
			X-25957	LC/MS pos early	63908					0.84	1.14	1.31	1.35	1.55	1.15		0.410176	0.354616	0.740137	0.773858	0.337137	0.72078	0.196201	0.184461	0.105745	0.141219	0.599206	0.920108		1.0699	0.9031	1.2185	1.4008		100	100	100	100		N/A	N/A
			X-26035	LC/MS pos early	64248					0.91	0.82	0.86	0.9	0.94	1.05		0.910026	0.519783	0.572787	0.730901	0.776803	0.85544	0.147893	0.157364	0.384253	0.312974	0.222254	0.743624		1.1567	1.0546	0.9474	0.9907		100	100	100	100		N/A	N/A	0
			X-26107	LC/MS pos late	64396					0.59	0.36	0.28	0.61	0.48	0.79		0.218646	0.241825	0.0155397	0.4917	0.00381139	0.491602	0.0183479	0.0532048	0.00587372	0.0449856	0.294243	0.795136		2.1817	1.2781	0.781	0.6192		100	100	100	86		N/A	N/A
			X-26191	LC/MS neg	64917					0.12	0.12	0.12	0.96	1.02	1.05		0.083712	0.129298	0.0697987	0.551308	0.0853202	0.577955	0.756395	0.412014	0.948674	0.504501	0.74036	0.923804		8.0332	0.9639	0.93	0.9792		100	100	100	100		N/A	N/A
